# Supplementary material for: Unusual Secondary Metabolites of the Aerial Parts of Dionysia diapensifolia Bioss. (Primulaceae) and Their Anti-Inflammatory Activity
Source: PubMed Central journal article supplement (PMC7175200; doi:10.3390/biom10030438), 2020-03-12
Supplement: biomolecules-10-00438-s001.pdf [file biomolecules-10-00438-s001.pdf]

# Unusual Secondary Metabolites of the Aerial Parts of *Dionysia diapensifolia* Bioss. (Primulaceae) and Their Anti-Inflammatory Activity

Mostafa Alilou <sup>1,2</sup>, Stefania Marzocco <sup>3,\*</sup>, Hossein Batooli <sup>4</sup>, Jakob Troppmair <sup>2</sup>, Stefan Schwaiger <sup>1,\*</sup> and Hermann Stuppner <sup>1</sup>

<sup>1</sup> Institute of Pharmacy, Pharmacognosy, Center for Molecular Biosciences (CMBI), University of Innsbruck, 6020 Innsbruck, Austria; mostafa.alilou@student.uibk.ac.at (M.A.); hermann.stuppner@uibk.ac.at (H.S.)

<sup>2</sup> Daniel-Swarovski Research Laboratory, Department of Visceral, Transplant and Thoracic Surgery, Innsbruck Medical University, Innrain 66, 6020 Innsbruck, Austria; jakob.troppmair@i-med.ac.at

<sup>3</sup> Department of Pharmacy, University of Salerno, Via Giovanni Paolo II 132, I-84084 Fisciano SA, Italy

<sup>4</sup> Kashan Botanical Garden, Research Institute of Forests and Rangelands; Agricultural Research, Education and Extension Organization (AREEO), 193951113 Tehran, Iran; ho\_batooli@yahoo.com

<sup>4</sup>

\* Correspondence: smarzocco@unisa.it (S.M.); stefan.schwaiger@uibk.ac.at (S.S.); Tel.: +39-089-969250 (S.M.); +43-512-507-58406 (S.S.)

## INDEX

|                                                                                                                      |    |
|----------------------------------------------------------------------------------------------------------------------|----|
| Figure S1. <sup>1</sup> H-NMR (600.19 MHz, CHCl <sub>3</sub> -d) of compound 1.....                                  | 4  |
| Figure S2. <sup>1</sup> H-NMR (600.19 MHz, CHCl <sub>3</sub> -d) of compound 1 (insert δ 8.0 – 6.5 ppm). .....       | 5  |
| Figure S3. COSY spectrum (600.19 MHz, CHCl <sub>3</sub> -d) of compound 1. ....                                      | 6  |
| Figure S4. HSQC spectrum (600.19/150.91 MHz, CHCl <sub>3</sub> -d) of compound 1. ....                               | 7  |
| Figure S5. HSQC spectrum (600.19/150.91 MHz, CHCl <sub>3</sub> -d) of compound 1 (insert δ 8.0 – 6.5 ppm)...         | 8  |
| Figure S6. HMBC spectrum (600.19/150.91 MHz, CHCl <sub>3</sub> -d) of compound 1. ....                               | 9  |
| Figure S7. HSQC spectrum (600.19/150.91 MHz, CHCl <sub>3</sub> -d) of compound 1 (insert δ 8.0 – 4.0 ppm). 10        |    |
| Figure S8. <sup>13</sup> C-NMR spectrum (150.91 MHz, CHCl <sub>3</sub> -d) of compound 1.....                        | 11 |
| Figure S9. IR spectrum of compound 1. ....                                                                           | 12 |
| Figure S10. HRLCESIMS spectrum of compound 1. ....                                                                   | 13 |
| Figure S11. <sup>1</sup> H-NMR (600.19 MHz, CHCl <sub>3</sub> -d) of compound 2.....                                 | 14 |
| Figure S12. <sup>1</sup> H-NMR (600.19 MHz, CHCl <sub>3</sub> -d) of compound 2 (insert δ 8.2 – 6.7 ppm). ....       | 15 |
| Figure S13. COSY spectrum (600.19 MHz, CHCl <sub>3</sub> -d) of compound 2. ....                                     | 16 |
| Figure S14. COSY spectrum (600.19 MHz, CHCl <sub>3</sub> -d) of compound 2 (insert δ 8.2 – 6.7 ppm).....             | 17 |
| Figure S15. HSQC spectrum (600.19/150.91 MHz, CHCl <sub>3</sub> -d) of compound 2. ....                              | 18 |
| Figure S16. HSQC spectrum (600.19/150.91 MHz, CHCl <sub>3</sub> -d) of compound 2 (insert δ 8.2 – 5.4 ppm).<br>..... | 19 |
| Figure S17. HMBC spectrum (600.19/150.91 MHz, CHCl <sub>3</sub> -d) of compound 2. ....                              | 20 |
| Figure S18. HMBC spectrum (600.19/150.91 MHz, CHCl <sub>3</sub> -d) of compound 2 (insert δ 11.7 – 5.5<br>ppm). .... | 21 |

|                                                                                                               |    |
|---------------------------------------------------------------------------------------------------------------|----|
| Figure S19. <sup>13</sup> C-NMR (600.19/150.91 MHz, CHCl <sub>3</sub> - <i>d</i> ) of compound <b>2</b> ..... | 22 |
| Figure S20. IR spectrum of compound <b>2</b> .....                                                            | 23 |
| Figure S21. HRLCESIMS spectrum of compound <b>2</b> .....                                                     | 24 |
| Figure S22. <sup>1</sup> H-NMR (600.19 MHz, CHCl <sub>3</sub> - <i>d</i> ) of compound <b>3</b> .....         | 25 |
| Figure S23. COSY spectrum (600.19 MHz, CHCl <sub>3</sub> - <i>d</i> ) of compound <b>3</b> .....              | 26 |
| Figure S24. HSQC spectrum (600.19, 150.91 MHz, CHCl <sub>3</sub> - <i>d</i> ) of compound <b>3</b> .....      | 27 |
| Figure S25. HMBC spectrum (600.19, 150.91 MHz, CHCl <sub>3</sub> - <i>d</i> ) of compound <b>3</b> .....      | 28 |
| Figure S26. <sup>13</sup> C-NMR (150.91 MHz, CHCl <sub>3</sub> - <i>d</i> ) of compound <b>3</b> .....        | 29 |
| Figure S27. <sup>1</sup> H-NMR (600.19 MHz, CHCl <sub>3</sub> - <i>d</i> ) of compound <b>4</b> .....         | 30 |
| Figure S28. <sup>13</sup> C-NMR (150.91 MHz, CHCl <sub>3</sub> - <i>d</i> ) of compound <b>4</b> .....        | 31 |
| Figure S29. <sup>1</sup> H-NMR (600.19 MHz, CHCl <sub>3</sub> - <i>d</i> ) of compound <b>5</b> .....         | 32 |
| Figure S30. <sup>13</sup> C-NMR (150.91 MHz, CHCl <sub>3</sub> - <i>d</i> ) of compound <b>5</b> .....        | 33 |
| Figure S31. <sup>1</sup> H-NMR (600.19 MHz, CHCl <sub>3</sub> - <i>d</i> ) of compound <b>6</b> .....         | 34 |
| Figure S32. <sup>13</sup> C-NMR (150.91 MHz, CHCl <sub>3</sub> - <i>d</i> ) of compound <b>6</b> .....        | 35 |
| Figure S33. <sup>1</sup> H-NMR (600.19 MHz, CHCl <sub>3</sub> - <i>d</i> ) of compound <b>7</b> .....         | 36 |
| Figure S34. <sup>13</sup> C-NMR (150.91 MHz, CHCl <sub>3</sub> - <i>d</i> ) of compound <b>7</b> .....        | 37 |
| Figure S35. <sup>1</sup> H-NMR (600.19 MHz, CHCl <sub>3</sub> - <i>d</i> ) of compound <b>8</b> .....         | 38 |
| Figure S36. <sup>13</sup> C-NMR (150.91 MHz, CHCl <sub>3</sub> - <i>d</i> ) of compound <b>8</b> .....        | 39 |
| Figure S37. <sup>1</sup> H-NMR (600.19 MHz, MeOH- <i>d</i> <sub>4</sub> ) of compound <b>9</b> .....          | 40 |
| Figure S38. <sup>13</sup> C-NMR (150.91 MHz, MeOH- <i>d</i> <sub>4</sub> ) of compound <b>9</b> .....         | 41 |
| Figure S39. <sup>1</sup> H-NMR (600.19 MHz, DMSO- <i>d</i> <sub>6</sub> ) of compound <b>10</b> .....         | 42 |
| Figure S40. <sup>13</sup> C-NMR (150.91 MHz, DMSO- <i>d</i> <sub>6</sub> ) of compound <b>10</b> .....        | 43 |
| Figure S41. <sup>1</sup> H-NMR (600.19 MHz, MeOH- <i>d</i> <sub>4</sub> ) of compound <b>11</b> .....         | 44 |
| Figure S42. <sup>13</sup> C-NMR (150.91 MHz, MeOH- <i>d</i> <sub>4</sub> ) of compound <b>11</b> .....        | 45 |
| Figure S43. <sup>1</sup> H-NMR (600.19 MHz, MeOH- <i>d</i> <sub>4</sub> ) of compound <b>12</b> .....         | 46 |
| Figure S44. <sup>13</sup> C-NMR (150.91 MHz, MeOH- <i>d</i> <sub>4</sub> ) of compound <b>12</b> .....        | 47 |
| Figure S45. <sup>1</sup> H-NMR (600.19 MHz, MeOH- <i>d</i> <sub>4</sub> ) of compound <b>13</b> .....         | 48 |
| Figure S46. <sup>13</sup> C-NMR (150.91 MHz, MeOH- <i>d</i> <sub>4</sub> ) of compound <b>13</b> .....        | 49 |
| Figure S47. <sup>1</sup> H-NMR (600.19 MHz, Acetone- <i>d</i> <sub>6</sub> ) of compound <b>14</b> .....      | 50 |
| Figure S48. <sup>13</sup> C-NMR (150.91 MHz, Acetone- <i>d</i> <sub>6</sub> ) of compound <b>14</b> .....     | 51 |
| Figure S49. <sup>1</sup> H-NMR (600.19 MHz, DMSO- <i>d</i> <sub>6</sub> ) of compound <b>15</b> .....         | 52 |
| Figure S50. <sup>13</sup> C-NMR (150.91 MHz, DMSO- <i>d</i> <sub>6</sub> ) of compound <b>15</b> .....        | 53 |
| Figure S51. <sup>1</sup> H-NMR (600.19 MHz, DMSO- <i>d</i> <sub>6</sub> ) of compound <b>16</b> .....         | 54 |
| Figure S52. <sup>13</sup> C-NMR (150.91 MHz, DMSO- <i>d</i> <sub>6</sub> ) of compound <b>16</b> .....        | 55 |
| Figure S53. <sup>1</sup> H-NMR (600.19 MHz, CHCl <sub>3</sub> - <i>d</i> ) of compound <b>17</b> .....        | 56 |

|                                                                                                                                                                                                                                                                                                                                                            |    |
|------------------------------------------------------------------------------------------------------------------------------------------------------------------------------------------------------------------------------------------------------------------------------------------------------------------------------------------------------------|----|
| Figure S54. <sup>13</sup> C-NMR (150.91 MHz, CHCl <sub>3</sub> - <i>d</i> ) of compound <b>17</b> . .....                                                                                                                                                                                                                                                  | 57 |
| Figure S55. <sup>1</sup> H-NMR (600.19 MHz, CHCl <sub>3</sub> - <i>d</i> ) of compound <b>18</b> . .....                                                                                                                                                                                                                                                   | 58 |
| Figure S56. <sup>13</sup> C-NMR (150.91 MHz, CHCl <sub>3</sub> - <i>d</i> ) of compound <b>18</b> . .....                                                                                                                                                                                                                                                  | 59 |
| Figure S57. <sup>1</sup> H-NMR (600.19 MHz, DMSO- <i>d</i> <sub>6</sub> ) of compound <b>19</b> . .....                                                                                                                                                                                                                                                    | 60 |
| Figure S58. <sup>13</sup> C-NMR (150.91 MHz, DMSO- <i>d</i> <sub>6</sub> ) of compound <b>19</b> . .....                                                                                                                                                                                                                                                   | 61 |
| Figure S59. <sup>1</sup> H-NMR (600.19 MHz, DMSO- <i>d</i> <sub>6</sub> ) of compound <b>20</b> . .....                                                                                                                                                                                                                                                    | 62 |
| Figure S60. <sup>13</sup> C-NMR (150.91 MHz, DMSO- <i>d</i> <sub>6</sub> ) of compound <b>20</b> . .....                                                                                                                                                                                                                                                   | 63 |
| Figure S61. <sup>1</sup> H-NMR (600.19 MHz, MeOH- <i>d</i> <sub>4</sub> ) of compound <b>21</b> . .....                                                                                                                                                                                                                                                    | 64 |
| Figure S62. <sup>13</sup> C-NMR (150.91 MHz, MeOH- <i>d</i> <sub>4</sub> ) of compound <b>21</b> . .....                                                                                                                                                                                                                                                   | 65 |
| Figure S63. <sup>1</sup> H-NMR (600.19 MHz, CHCl <sub>3</sub> - <i>d</i> ) of compound <b>22</b> . .....                                                                                                                                                                                                                                                   | 66 |
| Figure S64. <sup>13</sup> C-NMR (150.91 MHz, CHCl <sub>3</sub> - <i>d</i> ) of compound <b>22</b> . .....                                                                                                                                                                                                                                                  | 67 |
| Figure S65. <sup>1</sup> H-NMR (600.19 MHz, Acetone- <i>d</i> <sub>6</sub> ) of compound <b>23</b> . .....                                                                                                                                                                                                                                                 | 68 |
| Figure S66. <sup>13</sup> C-NMR (150.91 MHz, Acetone- <i>d</i> <sub>6</sub> ) of compound <b>23</b> . .....                                                                                                                                                                                                                                                | 69 |
| Figure S67. <sup>1</sup> H-NMR (600.19 MHz, MeOH- <i>d</i> <sub>4</sub> ) of compound <b>24</b> . .....                                                                                                                                                                                                                                                    | 70 |
| Figure S68. <sup>13</sup> C-NMR (150.91 MHz, MeOH- <i>d</i> <sub>4</sub> ) of compound <b>24</b> . .....                                                                                                                                                                                                                                                   | 71 |
| Figure S69. <sup>1</sup> H-NMR (600.19 MHz, DMSO- <i>d</i> <sub>6</sub> ) of compound <b>25</b> . .....                                                                                                                                                                                                                                                    | 72 |
| Figure S70. <sup>13</sup> C-NMR (150.91 MHz, DMSO- <i>d</i> <sub>6</sub> ) of compound <b>25</b> . .....                                                                                                                                                                                                                                                   | 73 |
| Table S1. Anti-proliferative activity of selected compounds isolated from diethyl ether subfraction of the methanolic extract of <i>D. diapensifolia</i> in MTT assay after 24 h shown as % cellular inhibition (MEAN±SEM) of n = 3. ***, **, * denote $p < 0.001$ , $p < 0.01$ , $p < 0.05$ vs. control. ....                                             | 74 |
| Figure S71. HPLC-DAD chromatogram of <i>D. diapensifolia</i> <i>n</i> -butanol subfraction and rutin standard. ....                                                                                                                                                                                                                                        | 75 |
| Figure S72. Low energy conformers of compound <b>1</b> . Conformer generation was done on MacroModel 09 (Schrödinger Ltd.), using OPLS-3 as forcefield in gas phase. Conformers occurring in energy window of 5 kcal.mol <sup>-1</sup> were further optimized in DFT/6-31G(d,p) level in the gas phase using Gaussian 16 v. A3 software [1].....           | 76 |
| Table S2. Experimental chemical shifts and Boltzmann-averaged shielding tensors of two diastereomers of <b>1</b> , used for DP4+ chemical shift calculation. ....                                                                                                                                                                                          | 77 |
| Figure S73. The result sheet of DP4+ chemical shift probability calculation of two diastereomers of compound <b>1</b> . Calculation of shift tensors were done using GIAO/mpw1pw91/6-311+(d,p)/CPCM in CHCl <sub>3</sub> in Gaussian 16 A.3 [Ref]. DP4+ probability calculation was done using the method originally published by Grimblat et. al [2]..... | 78 |
| <b>References</b> .....                                                                                                                                                                                                                                                                                                                                    | 79 |

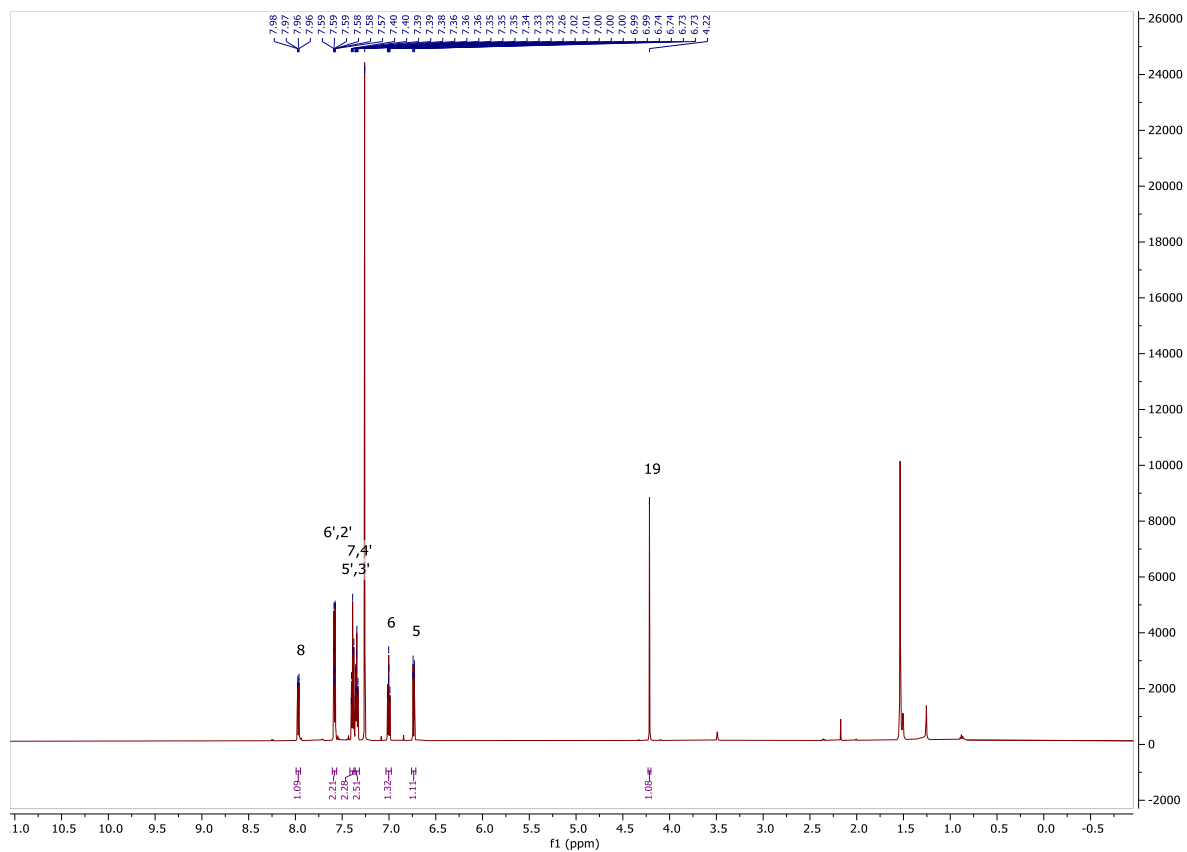

Figure S1.  $^1\text{H-NMR}$  (600.19 MHz,  $\text{CHCl}_3-d$ ) of compound 1.

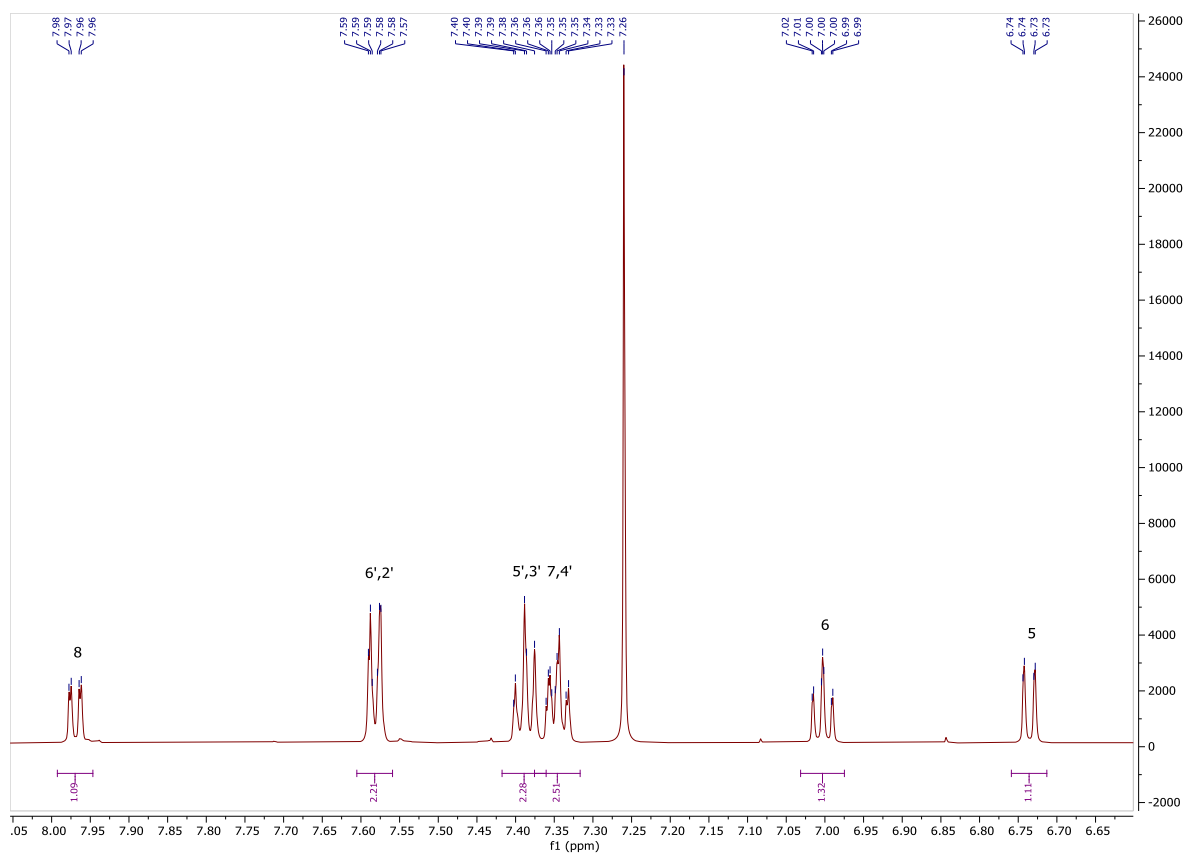

Figure S2. <sup>1</sup>H-NMR (600.19 MHz, CHCl<sub>3</sub>-d) of compound 1 (insert δ 8.0 – 6.5 ppm).

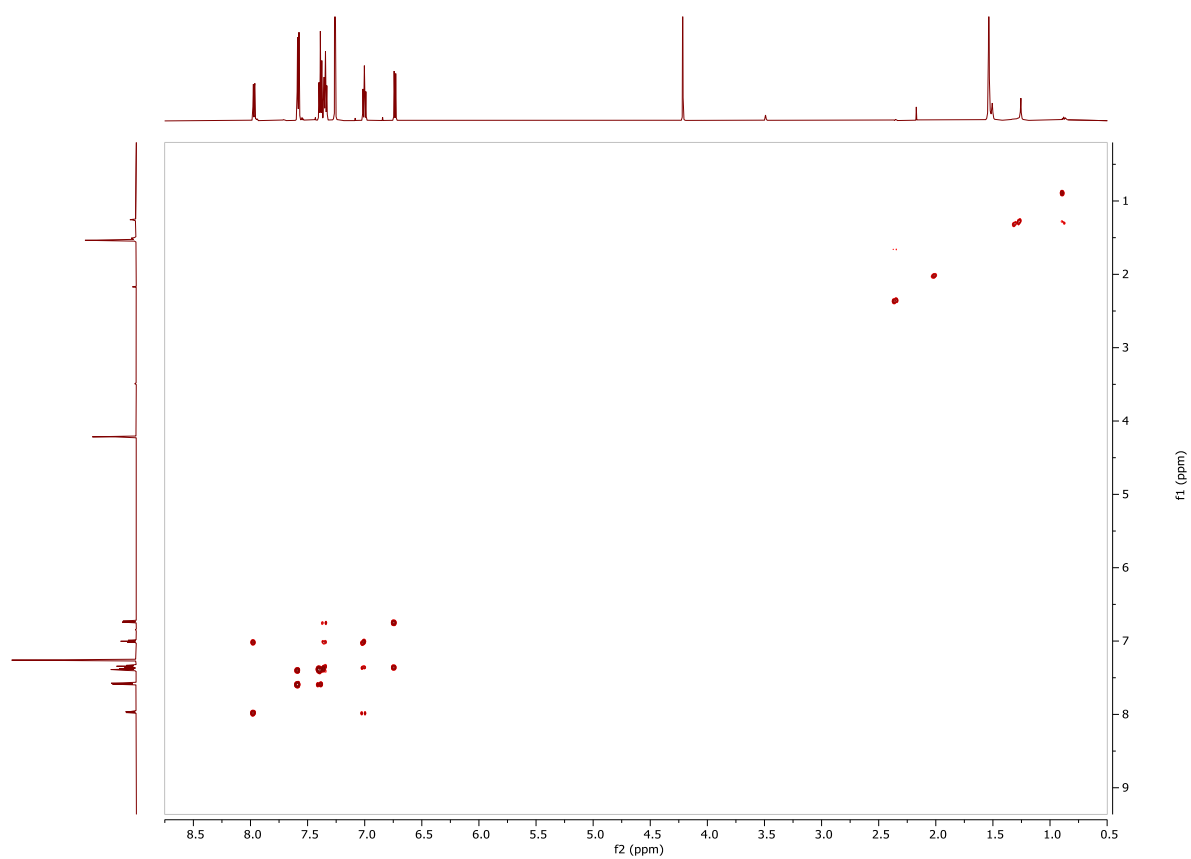

**Figure S3.** COSY spectrum (600.19 MHz, CHCl<sub>3</sub>-*d*) of compound 1.

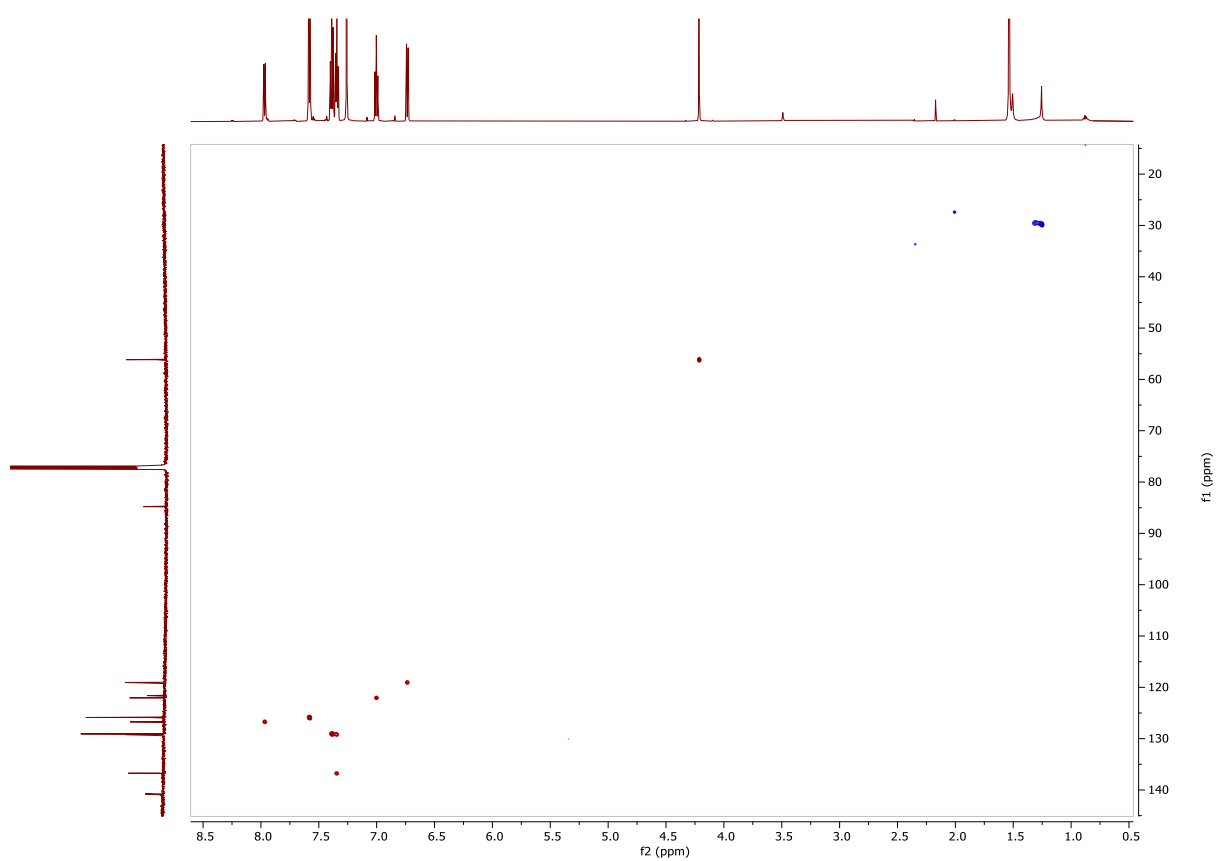

Figure S4. HSQC spectrum (600.19/150.91 MHz,  $\text{CHCl}_3-d$ ) of compound 1.

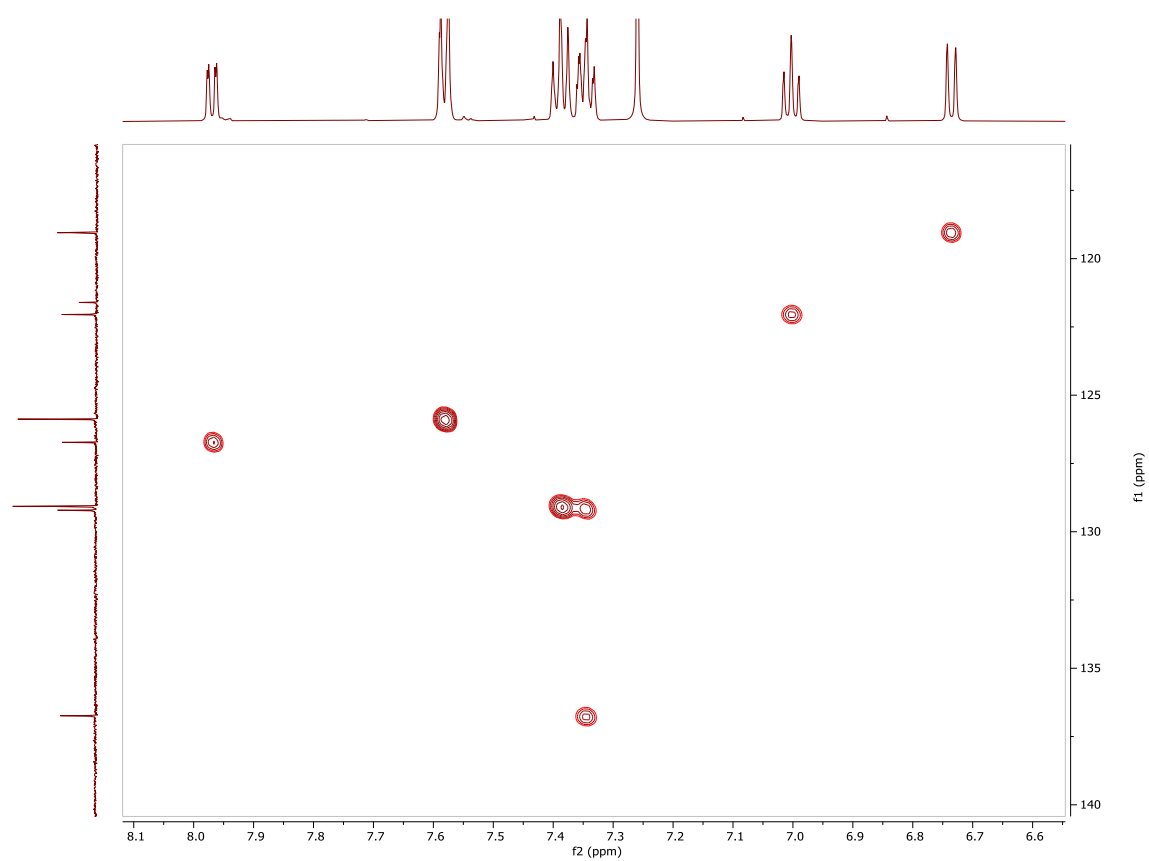

Figure S5. HSQC spectrum (600.19/150.91 MHz,  $\text{CHCl}_3$ -*d*) of compound 1 (insert  $\delta$  8.0 – 6.5 ppm).



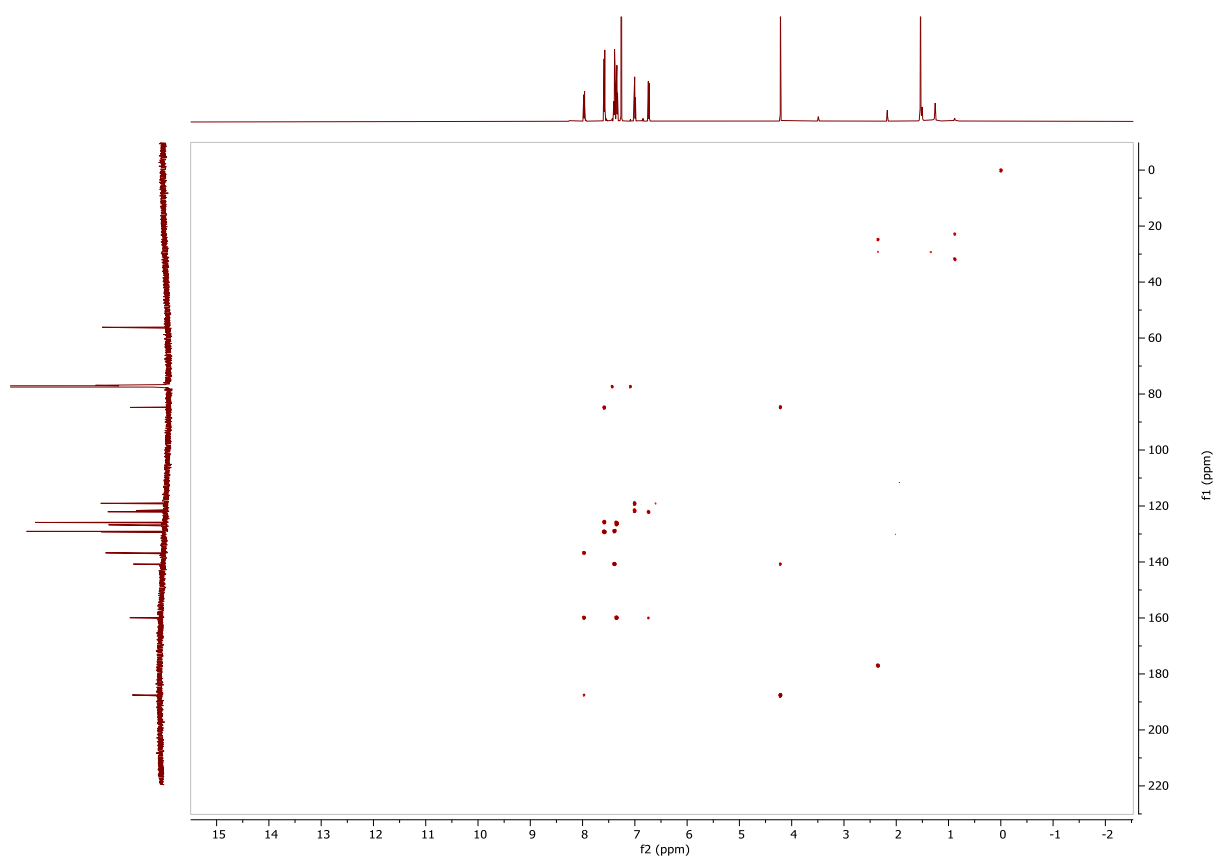

Figure S6. HMBC spectrum (600.19/150.91 MHz,  $\text{CHCl}_3-d$ ) of compound 1.

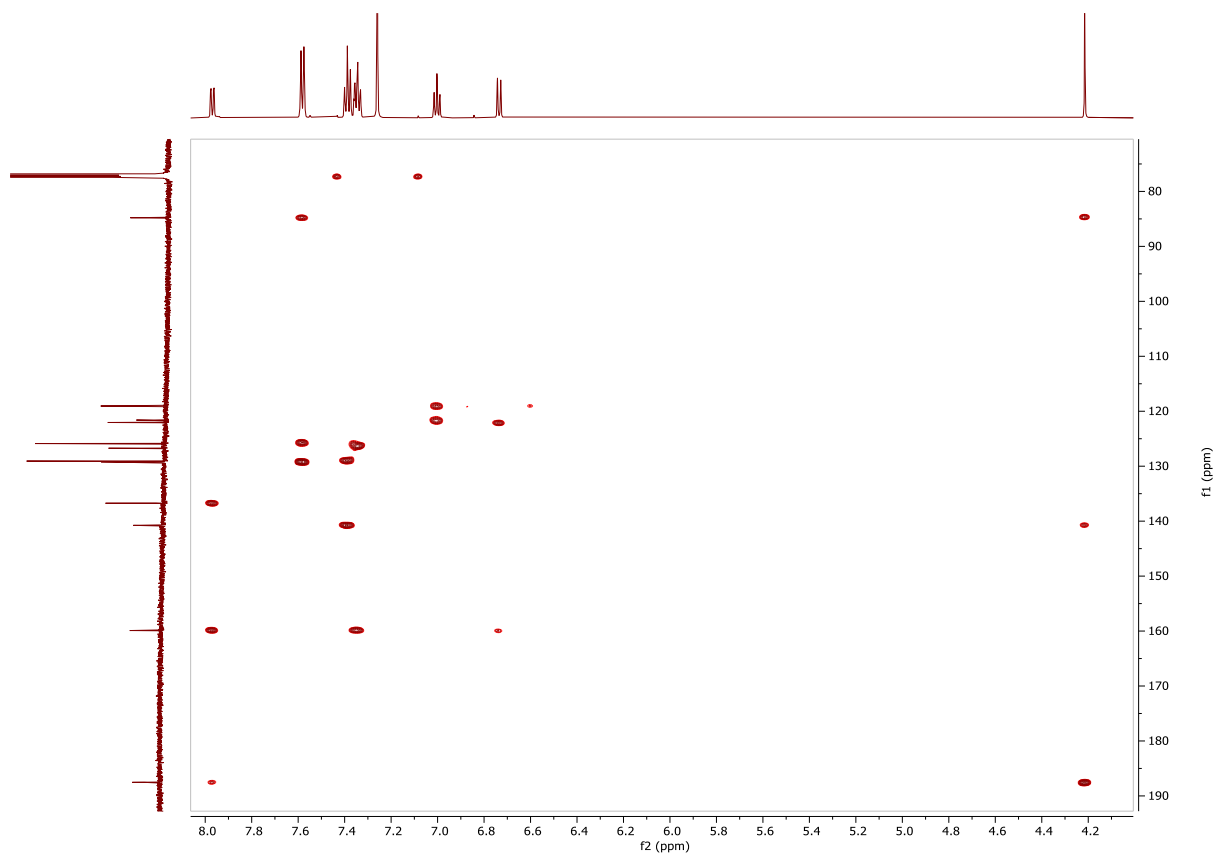

Figure S7. HSQC spectrum (600.19/150.91 MHz,  $\text{CHCl}_3$ -*d*) of compound 1 (insert  $\delta$  8.0 – 4.0 ppm).

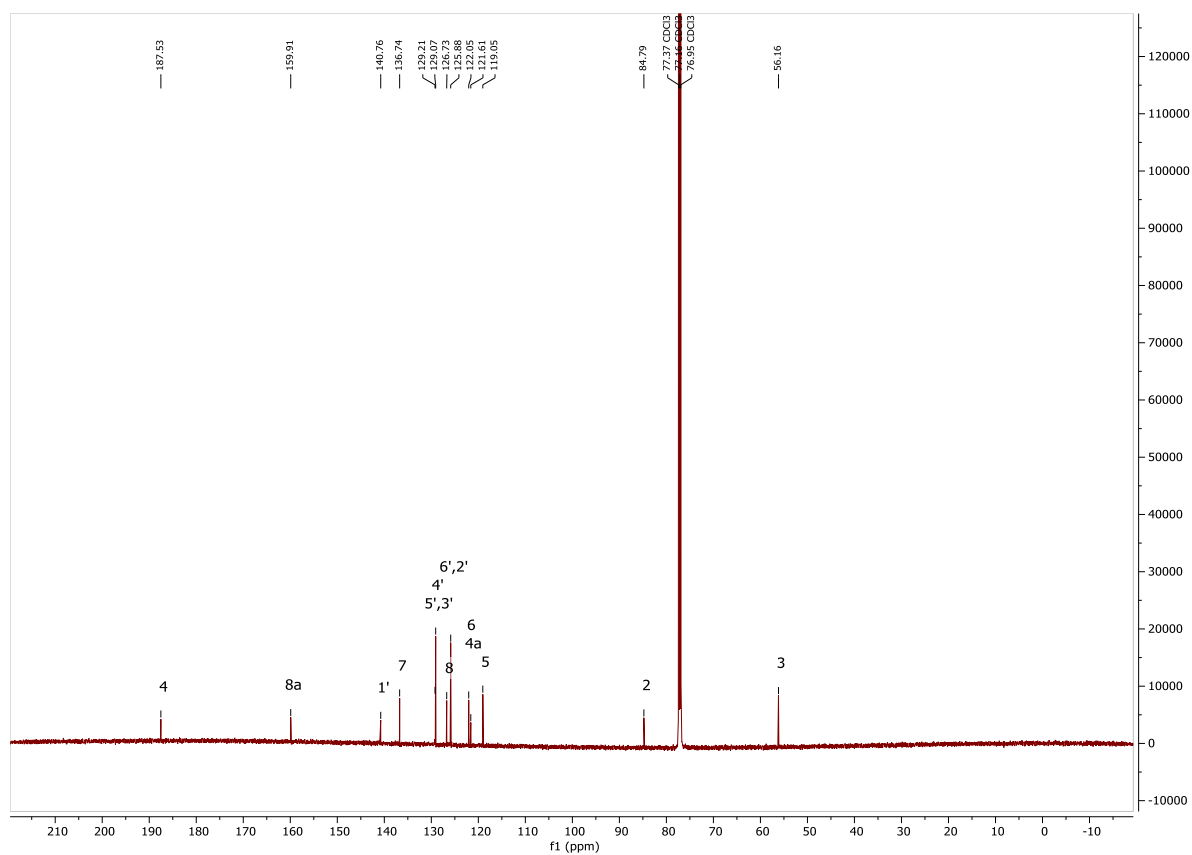

**Figure S8.**  $^{13}\text{C}$ -NMR spectrum (150.91 MHz,  $\text{CHCl}_3$ -*d*) of compound 1.

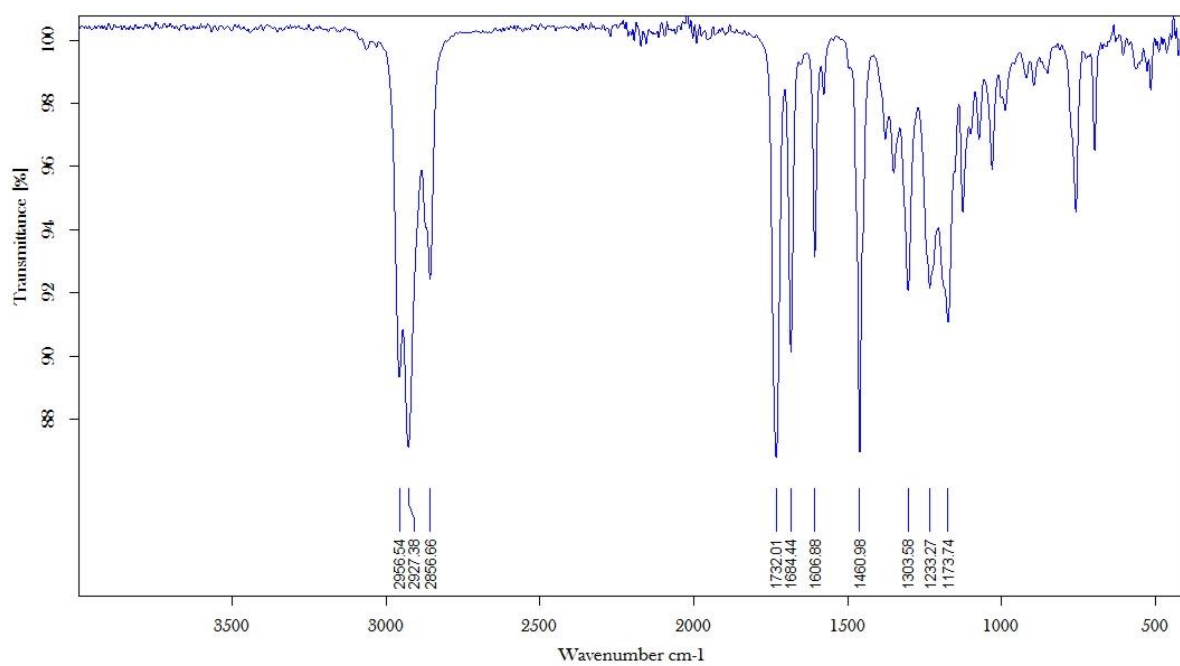

Figure S9. IR spectrum of compound 1.

## Mass Spectrum SmartFormula Report

### Analysis Info

Analysis Name D:\Data\Pharmakognosie\Mostafa\pure\_compounds\_LCMS\Drev\_48-51\_F7\_prep-2-pos\_62\_01\_26122.d  
Method screen\_neg\_2019.m  
Sample Name Drev\_48-51\_F7\_prep-2-pos  
Comment #7 - oeliger A. 1200784/0  
Aceton

Acquisition Date 2/7/2020 10:20:03 PM  
Operator Simon  
Instrument / Ser# micrOTOF-Q 10202

### Acquisition Parameter

|             |            |                       |           |                  |           |
|-------------|------------|-----------------------|-----------|------------------|-----------|
| Source Type | ESI        | Ion Polarity          | Negative  | Set Nebulizer    | 1.6 Bar   |
| Focus       | Not active | Set Capillary         | 3500 V    | Set Dry Heater   | 220 °C    |
| Scan Begin  | 100 m/z    | Set End Plate Offset  | -500 V    | Set Dry Gas      | 6.0 l/min |
| Scan End    | 1500 m/z   | Set Collision Cell RF | 452.4 Vpp | Set Divert Valve | Source    |

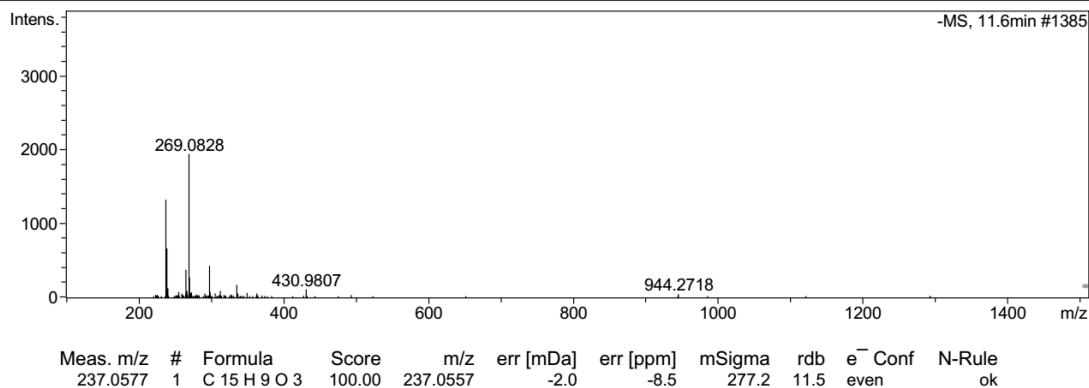

Figure S10. HRLCESIMS spectrum of compound 1.

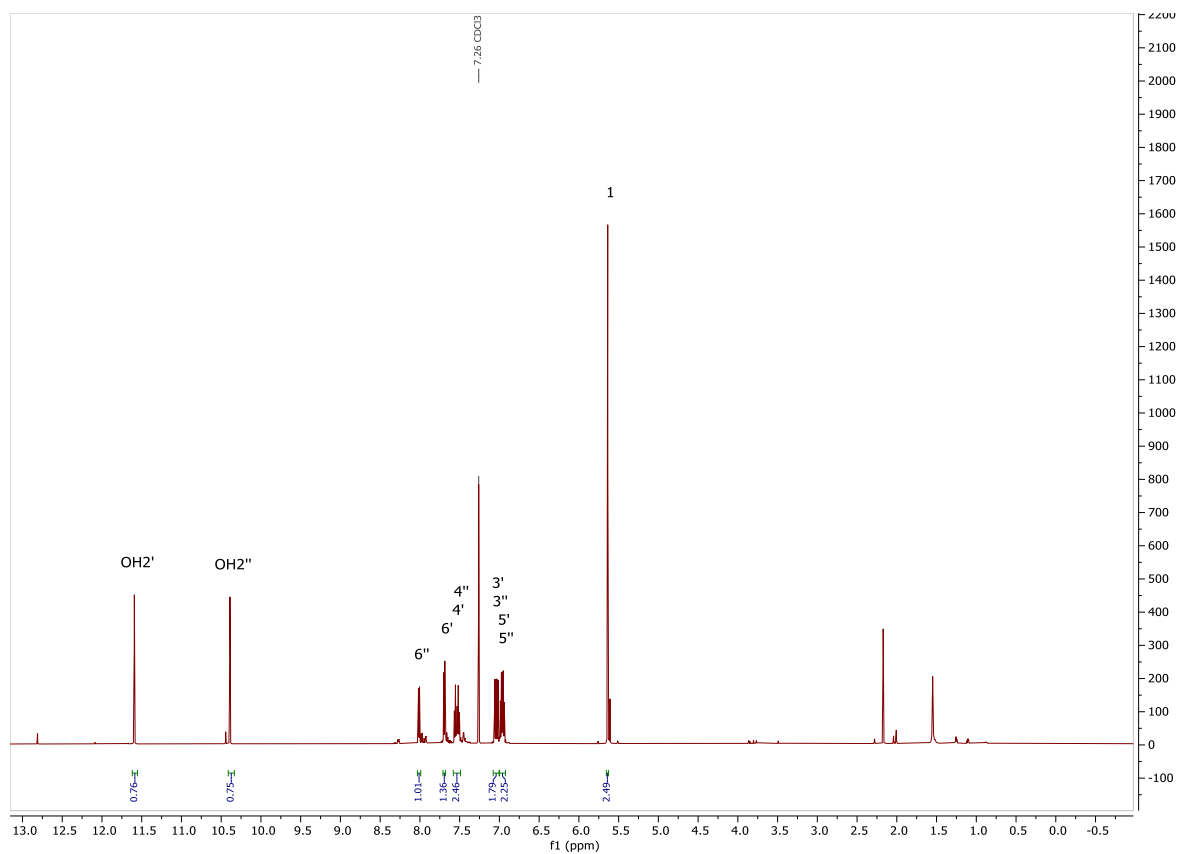

Figure S11. <sup>1</sup>H-NMR (600.19 MHz, CHCl<sub>3</sub>-d) of compound 2.

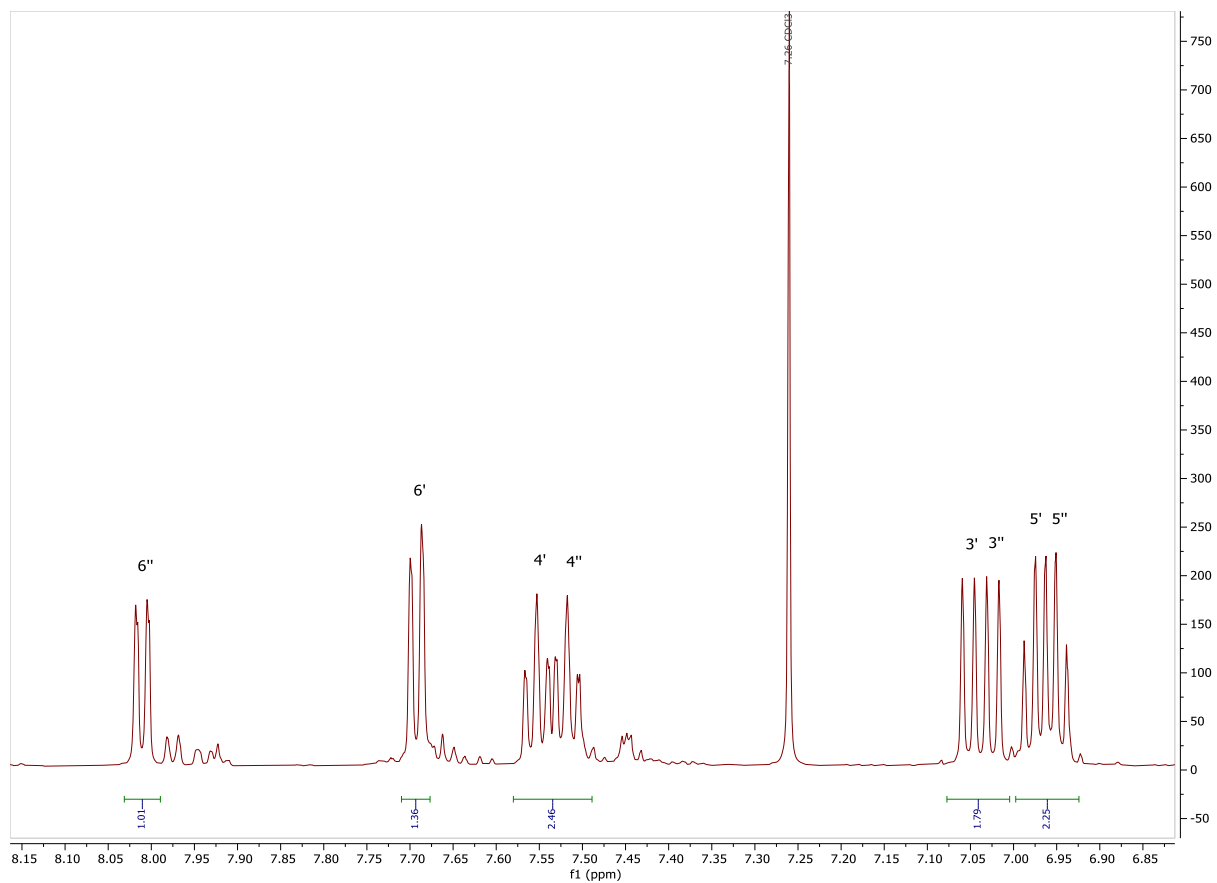

Figure S12. <sup>1</sup>H-NMR (600.19 MHz, CHCl<sub>3</sub>-d) of compound 2 (insert δ 8.2 – 6.7 ppm).

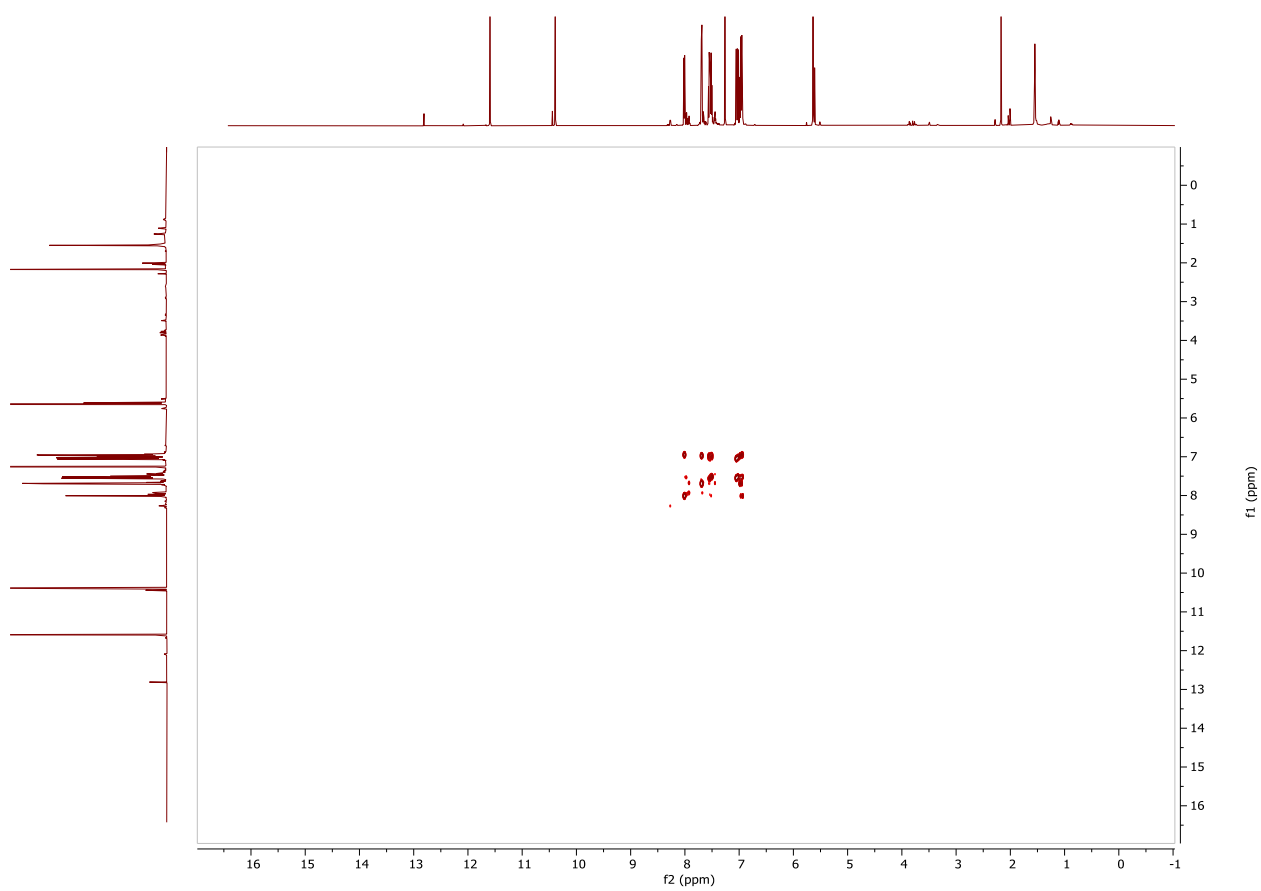

Figure S13. COSY spectrum (600.19 MHz, CHCl<sub>3</sub>-*d*) of compound 2.



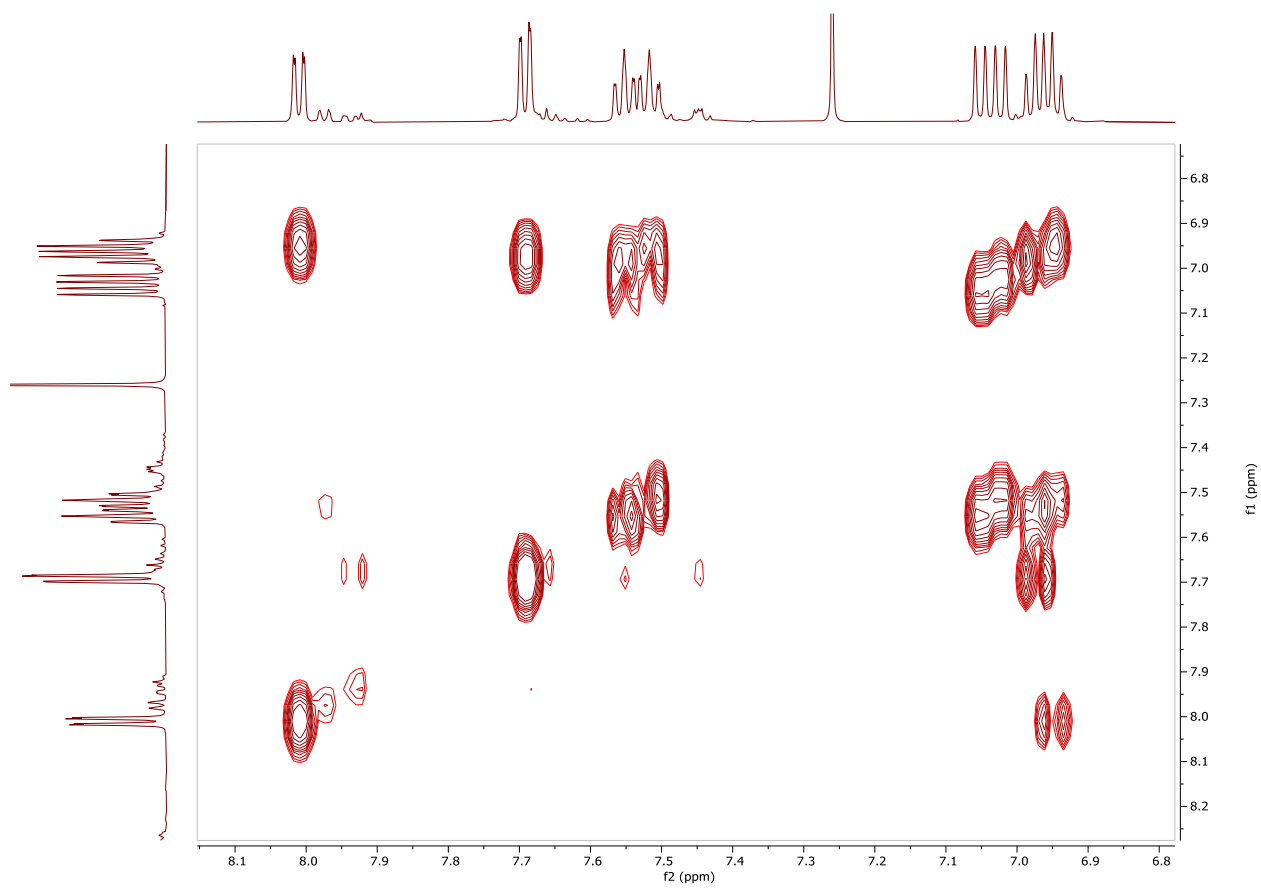

Figure S14. COSY spectrum (600.19 MHz, CHCl<sub>3</sub>-*d*) of compound 2 (insert  $\delta$  8.2 – 6.7 ppm).

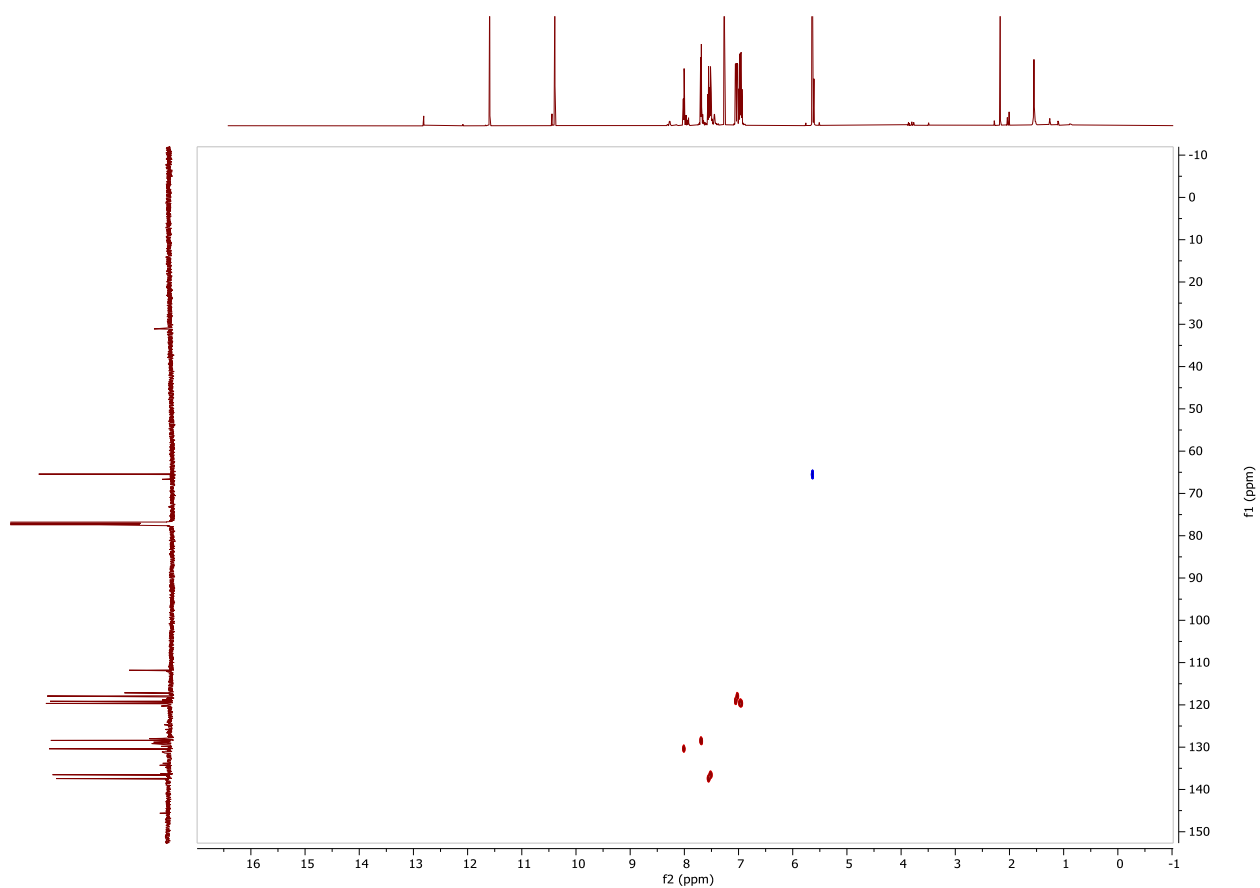

Figure S15. HSQC spectrum (600.19/150.91 MHz,  $\text{CHCl}_3-d$ ) of compound 2.

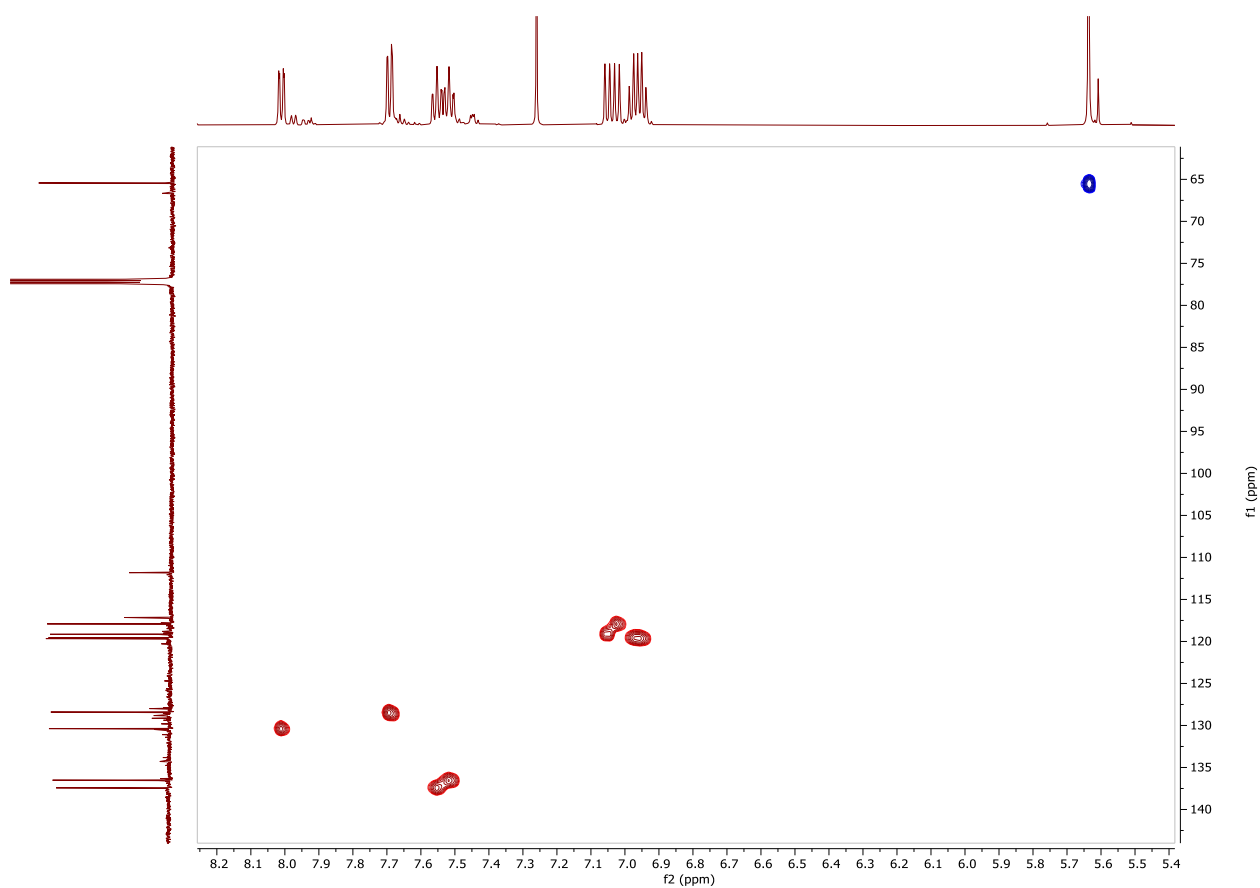

Figure S16. HSQC spectrum (600.19/150.91 MHz,  $\text{CHCl}_3-d$ ) of compound 2 (insert  $\delta$  8.2 – 5.4 ppm).

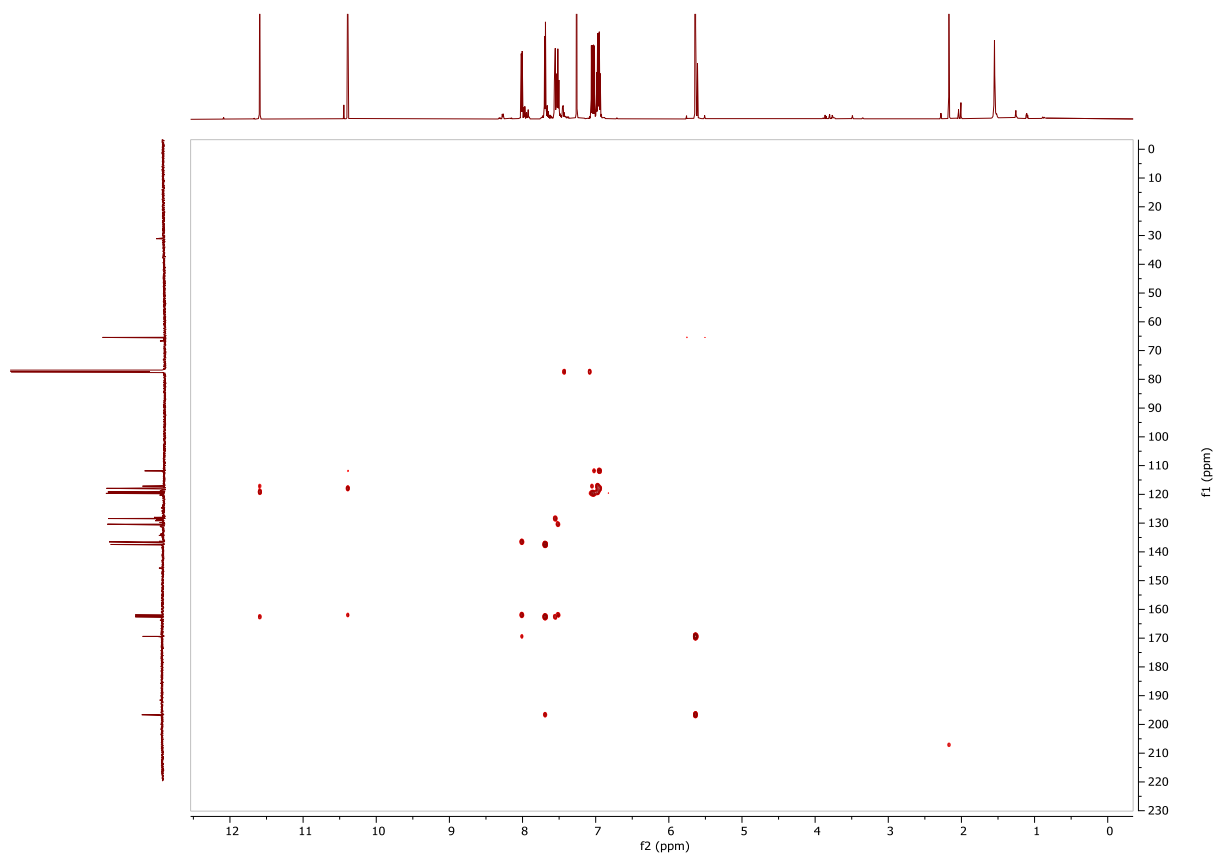

Figure S17. HMBC spectrum (600.19/150.91 MHz,  $\text{CHCl}_3-d$ ) of compound 2.

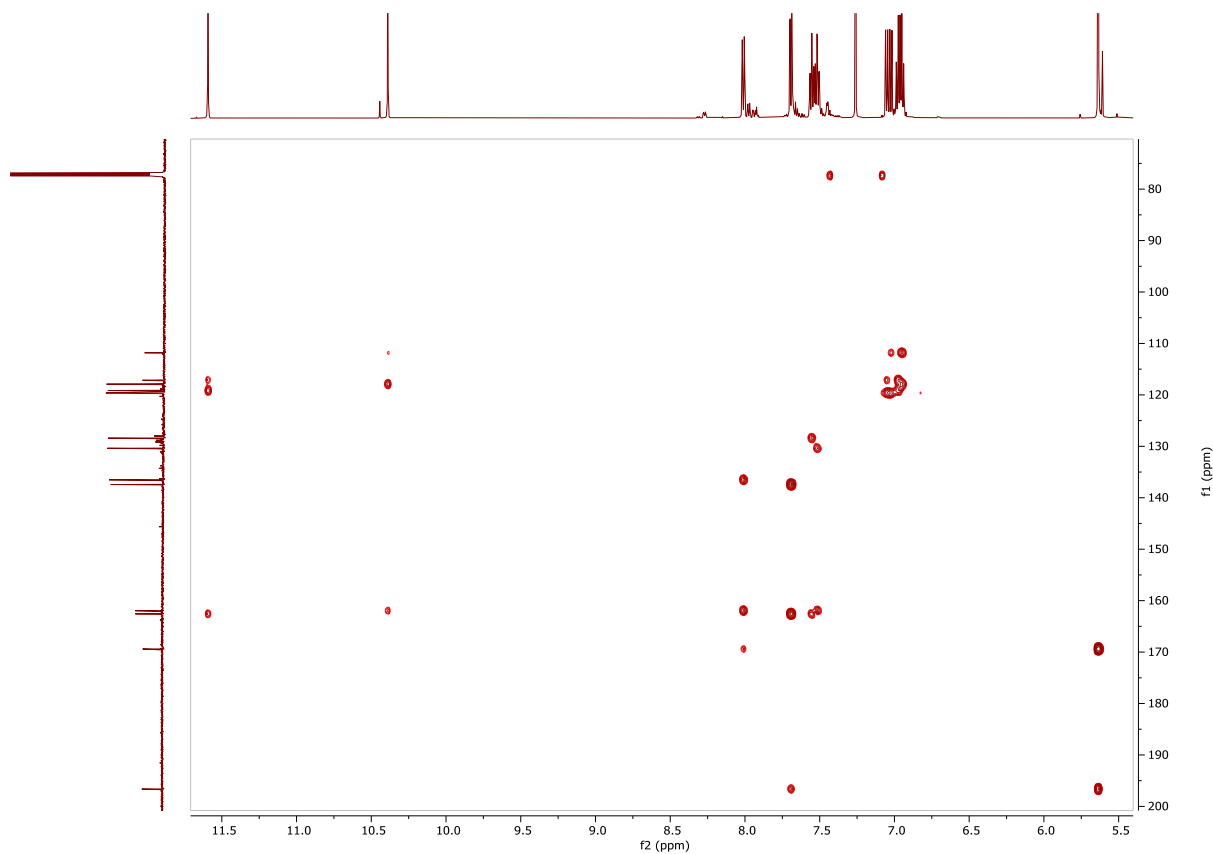

Figure S18. HMBC spectrum (600.19/150.91 MHz, CHCl<sub>3</sub>-d) of compound 22 (insert  $\delta$  11.7 – 5.5 ppm).

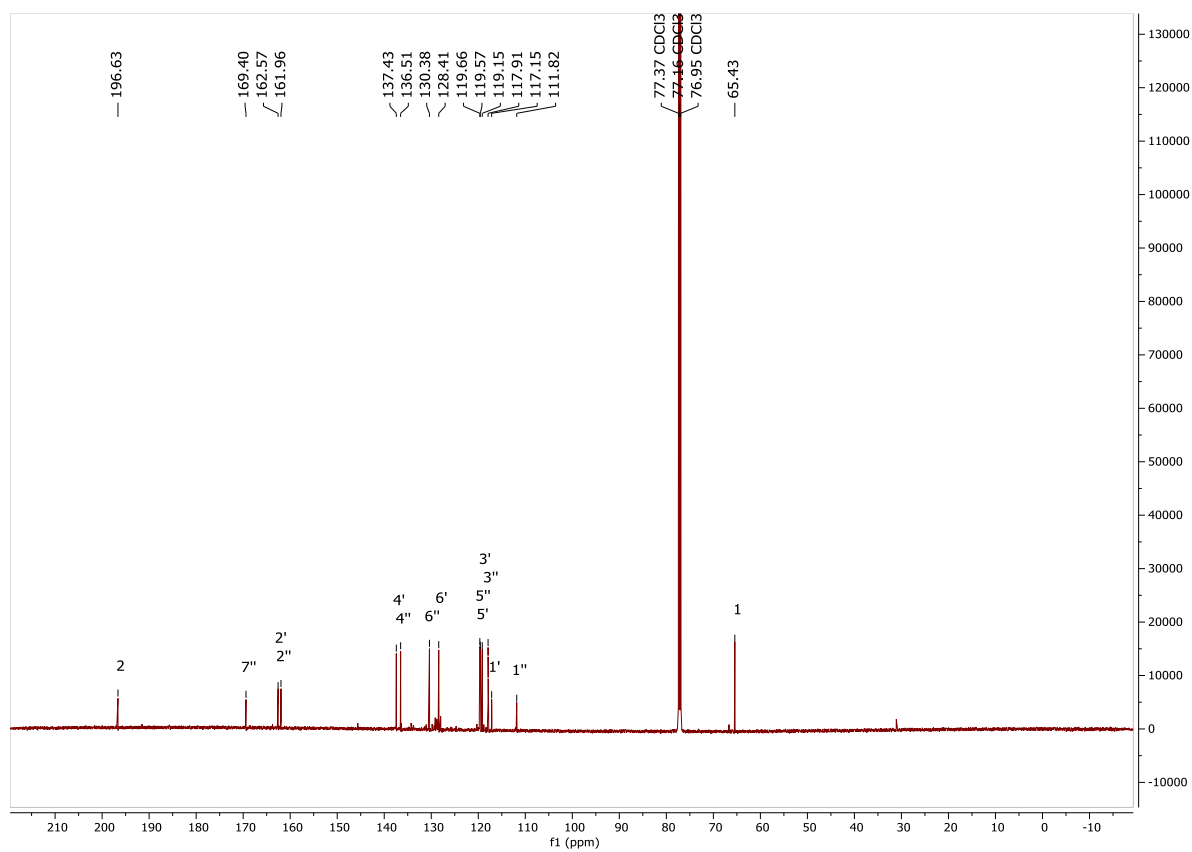

Figure S19.  $^{13}\text{C}$ -NMR (600.19/150.91 MHz,  $\text{CHCl}_3$ -*d*) of compound 2.

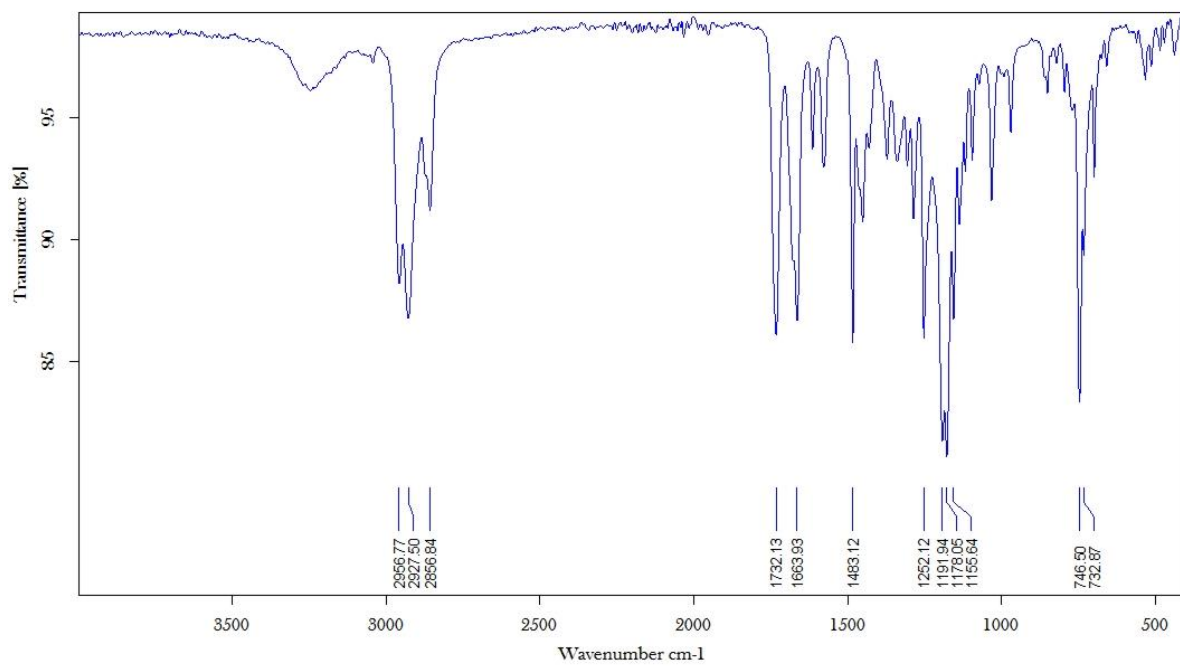

Figure S20. IR spectrum of compound 2.

## Mass Spectrum SmartFormula Report

### Analysis Info

Analysis Name D:\Data\Pharmakognosie\Mostafa\pure\_compounds\_LCMS\F8PS9\_THF\_pos\_45\_01\_26091.d  
Method screen\_pos\_2019.m  
Sample Name F8PS9\_THF\_pos  
Comment #7 - oeliger A. 1200784/0  
Acetone

Acquisition Date 1/10/2020 8:39:13 PM  
Operator Simon  
Instrument / Ser# micrOTOF-Q 10202

### Acquisition Parameter

|             |            |                       |           |                  |           |
|-------------|------------|-----------------------|-----------|------------------|-----------|
| Source Type | ESI        | Ion Polarity          | Positive  | Set Nebulizer    | 1.6 Bar   |
| Focus       | Not active | Set Capillary         | 4500 V    | Set Dry Heater   | 220 °C    |
| Scan Begin  | 100 m/z    | Set End Plate Offset  | -500 V    | Set Dry Gas      | 6.0 l/min |
| Scan End    | 1500 m/z   | Set Collision Cell RF | 452.4 Vpp | Set Divert Valve | Source    |

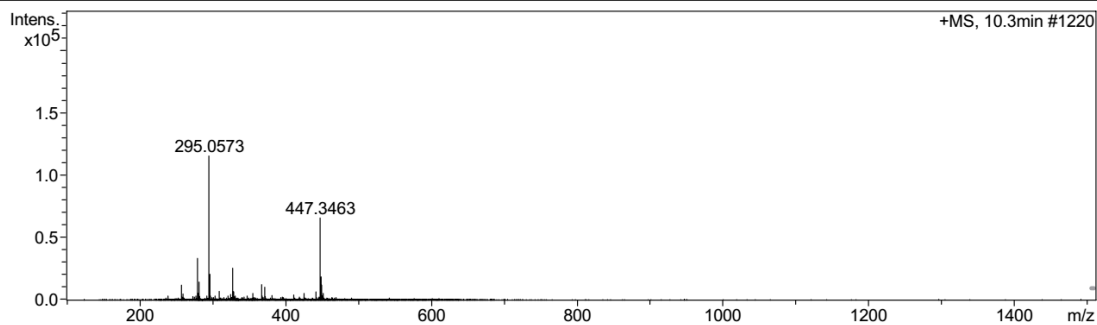

| Meas. m/z | # | Formula            | Score  | m/z      | err [mDa] | err [ppm] | mSigma | rdb | e <sup>-</sup> Conf | N-Rule |
|-----------|---|--------------------|--------|----------|-----------|-----------|--------|-----|---------------------|--------|
| 295.0573  | 1 | C 15 H 12 Na O 5   | 100.00 | 295.0577 | 0.4       | 1.3       | 8.3    | 9.5 | even                | ok     |
|           | 2 | C 13 H 13 Na 2 O 5 | 28.64  | 295.0553 | -2.0      | -6.9      | 20.9   | 6.5 | even                | ok     |

Figure S21. HRLCESIMS spectrum of compound 2.



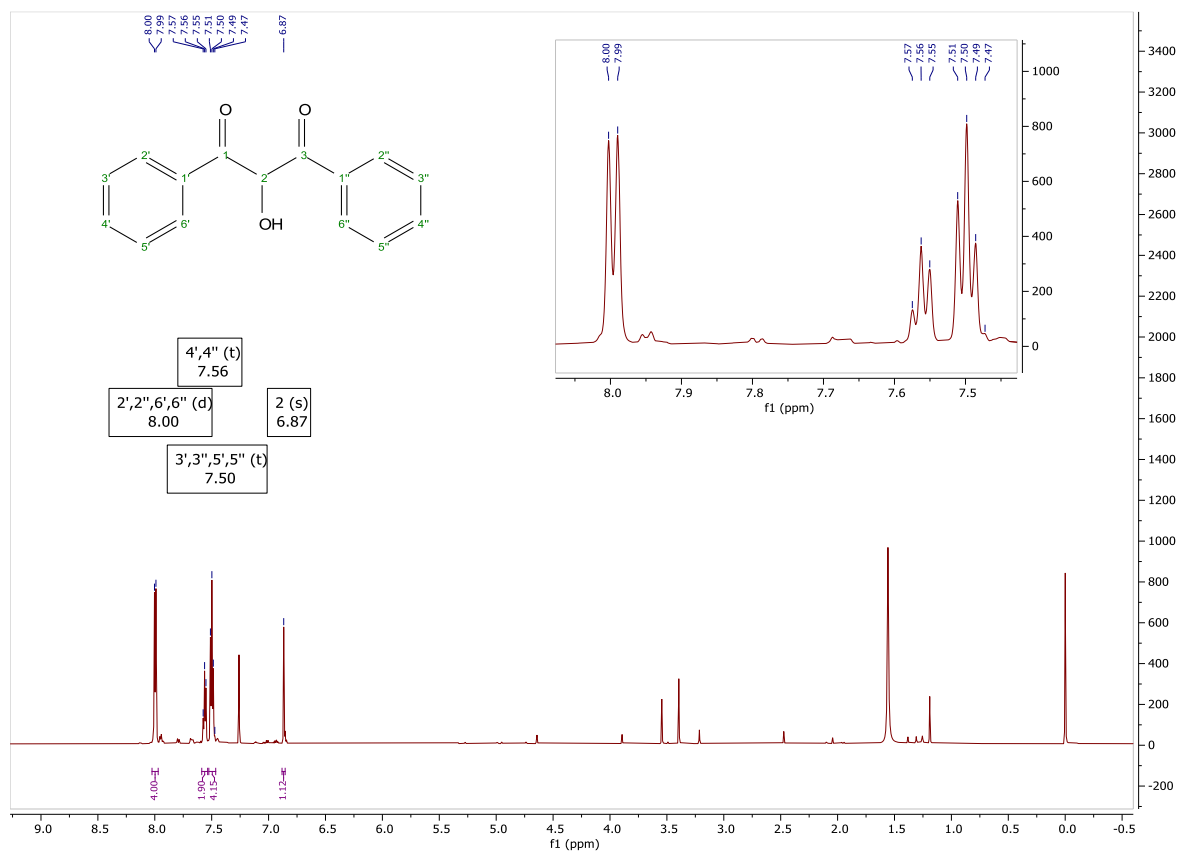

Figure S22.  $^1\text{H-NMR}$  (600.19 MHz,  $\text{CHCl}_3-d$ ) of compound 3.

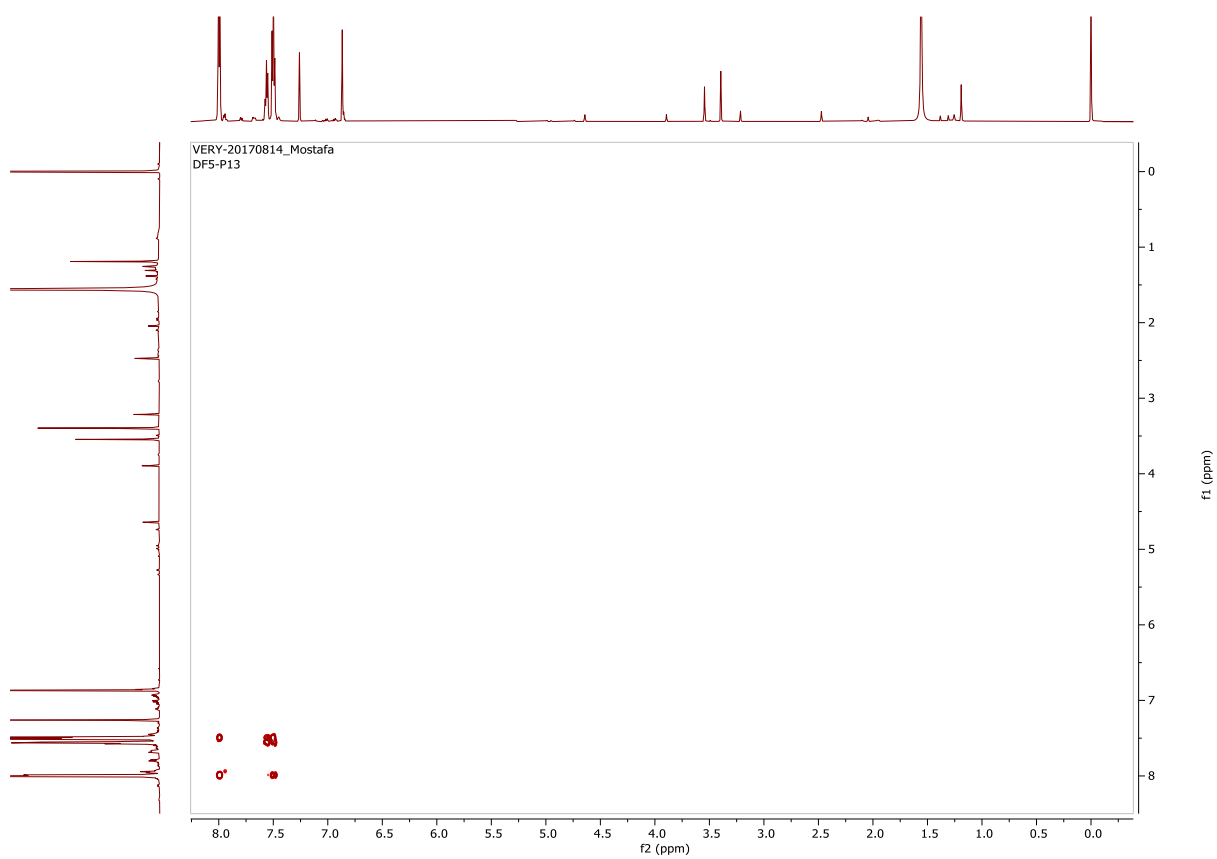

Figure S23. COSY spectrum (600.19 MHz,  $\text{CHCl}_3-d$ ) of compound 3.

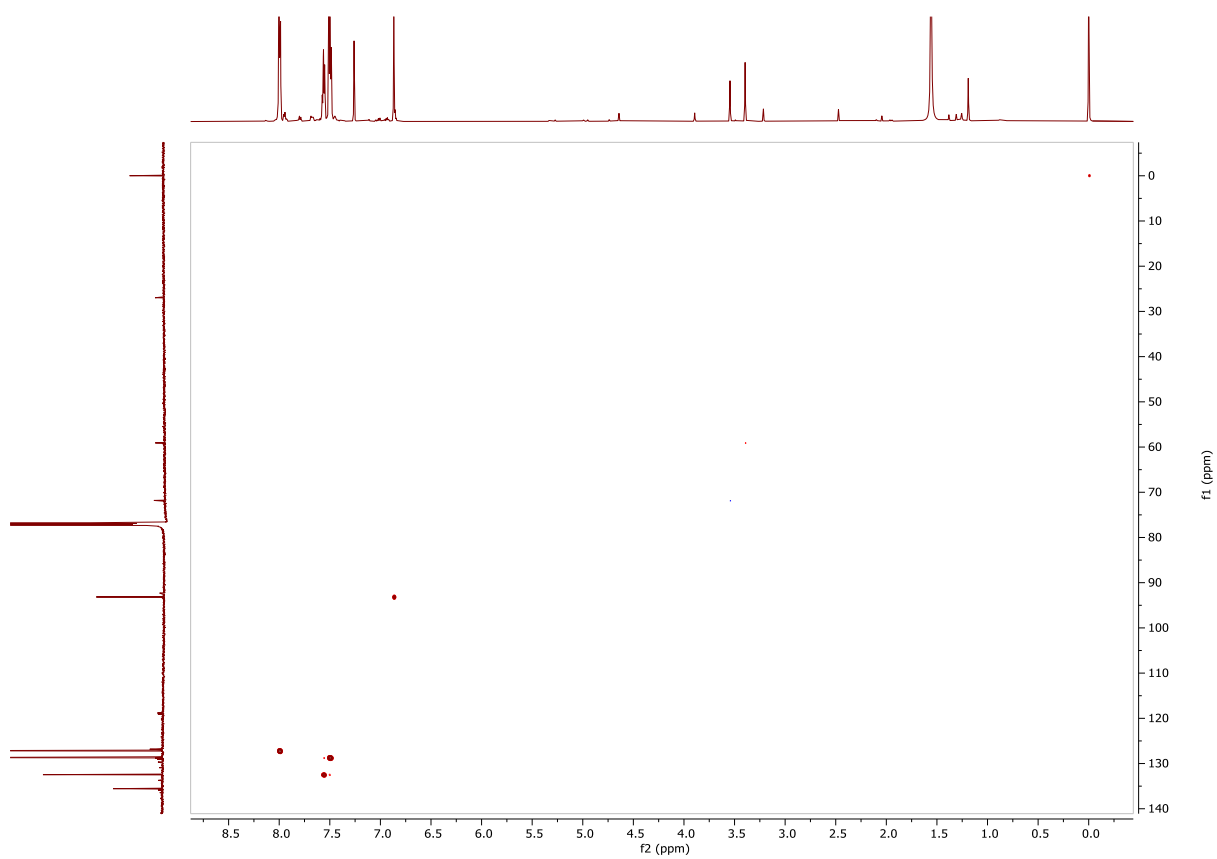

Figure S24. HSQC spectrum (600.19, 150.91 MHz, CHCl<sub>3</sub>-*d*) of compound 3.

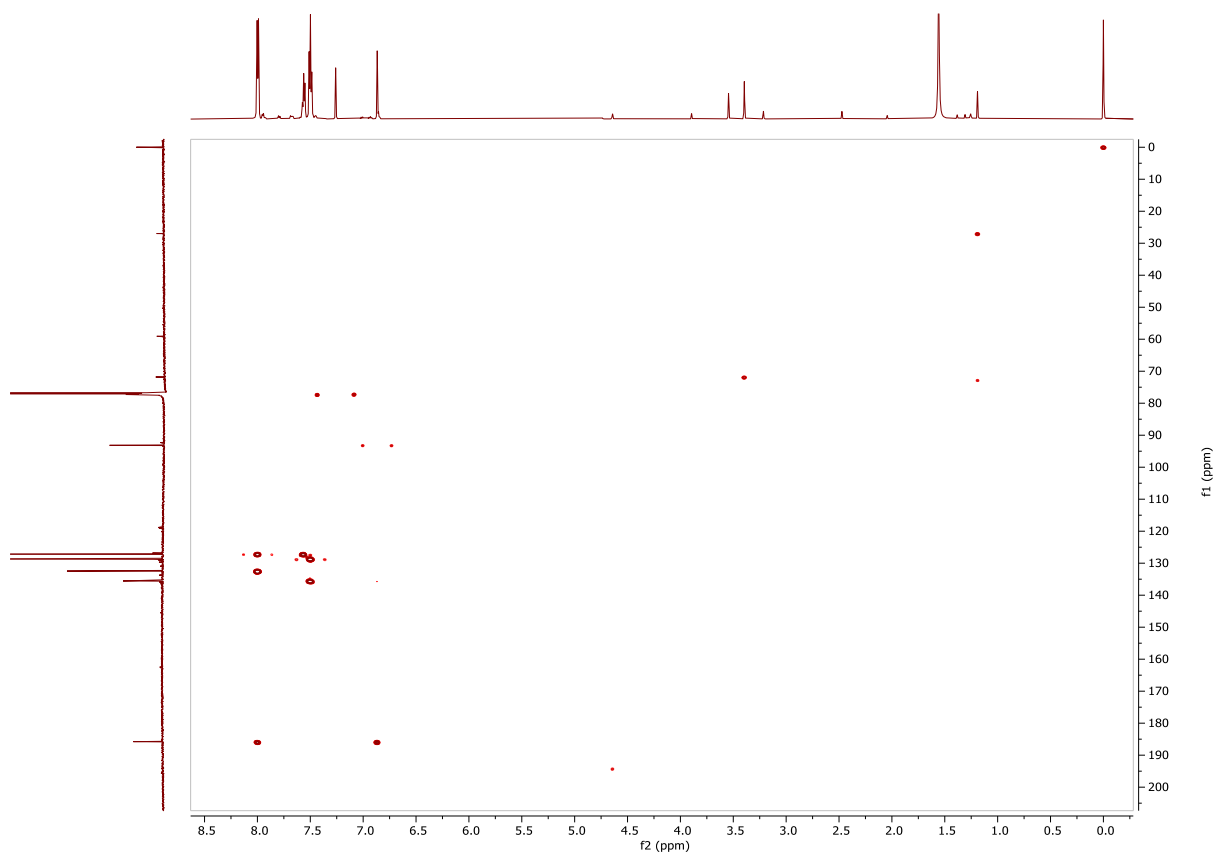

Figure S25. HMBC spectrum (600.19, 150.91 MHz,  $\text{CHCl}_3-d$ ) of compound 3.

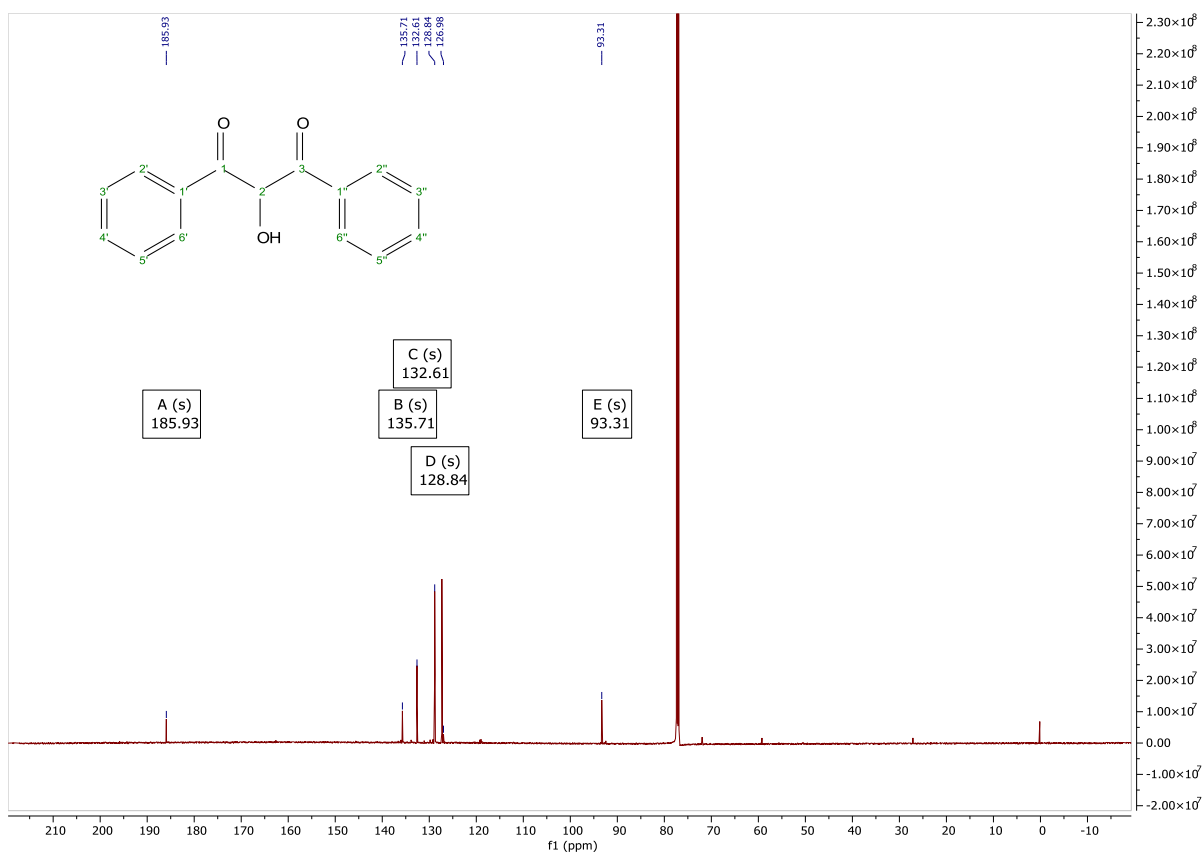

Figure S26. <sup>13</sup>C-NMR (150.91 MHz, CHCl<sub>3</sub>-d) of compound 3.

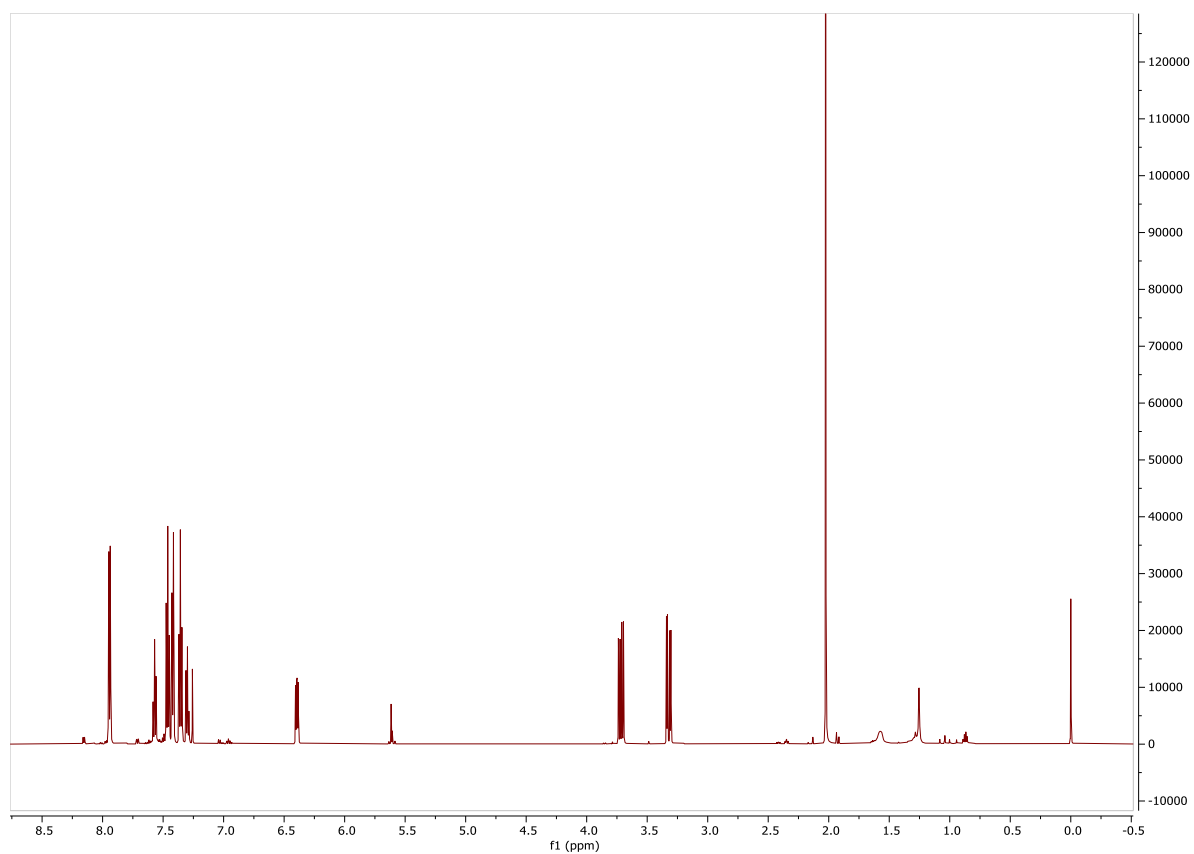

**Figure S27.** <sup>1</sup>H-NMR (600.19 MHz, CHCl<sub>3</sub>-*d*) of compound 4.

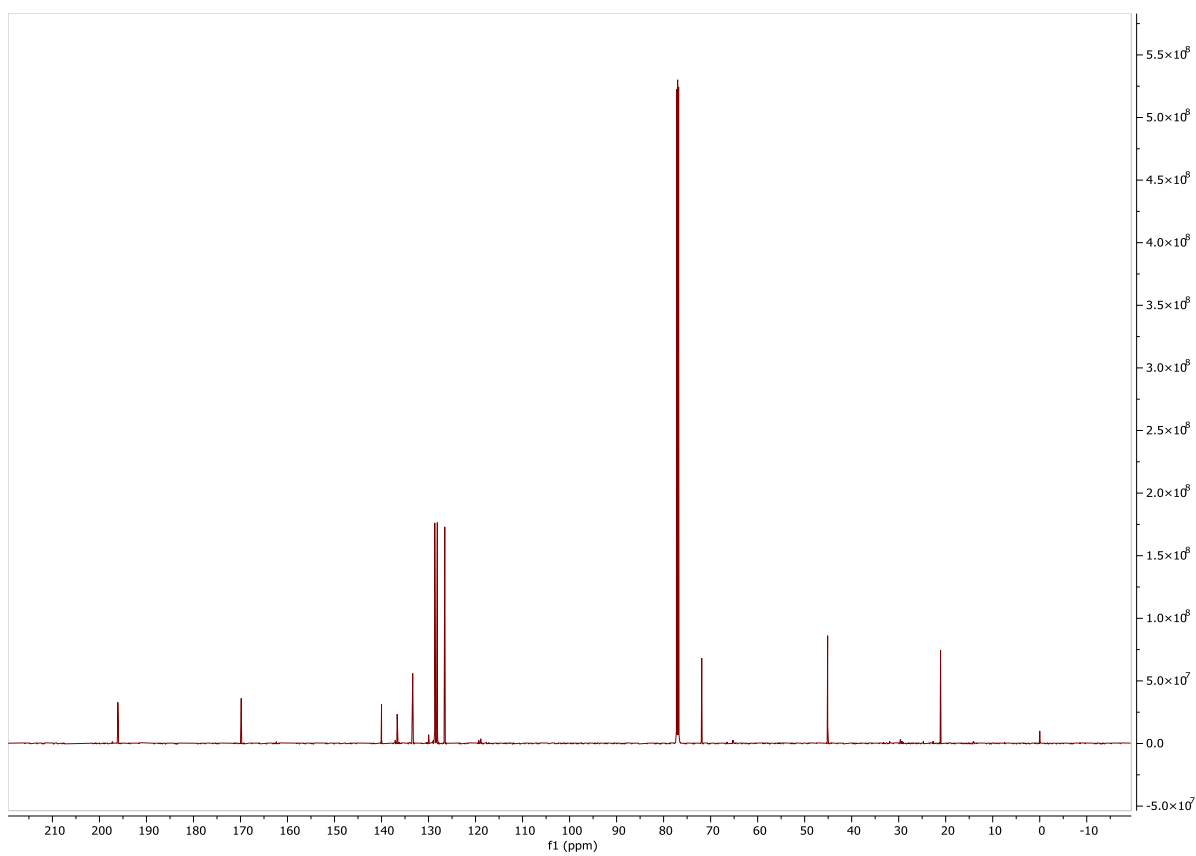

Figure S28.  $^{13}\text{C}$ -NMR (150.91 MHz,  $\text{CHCl}_3$ -*d*) of compound 4.

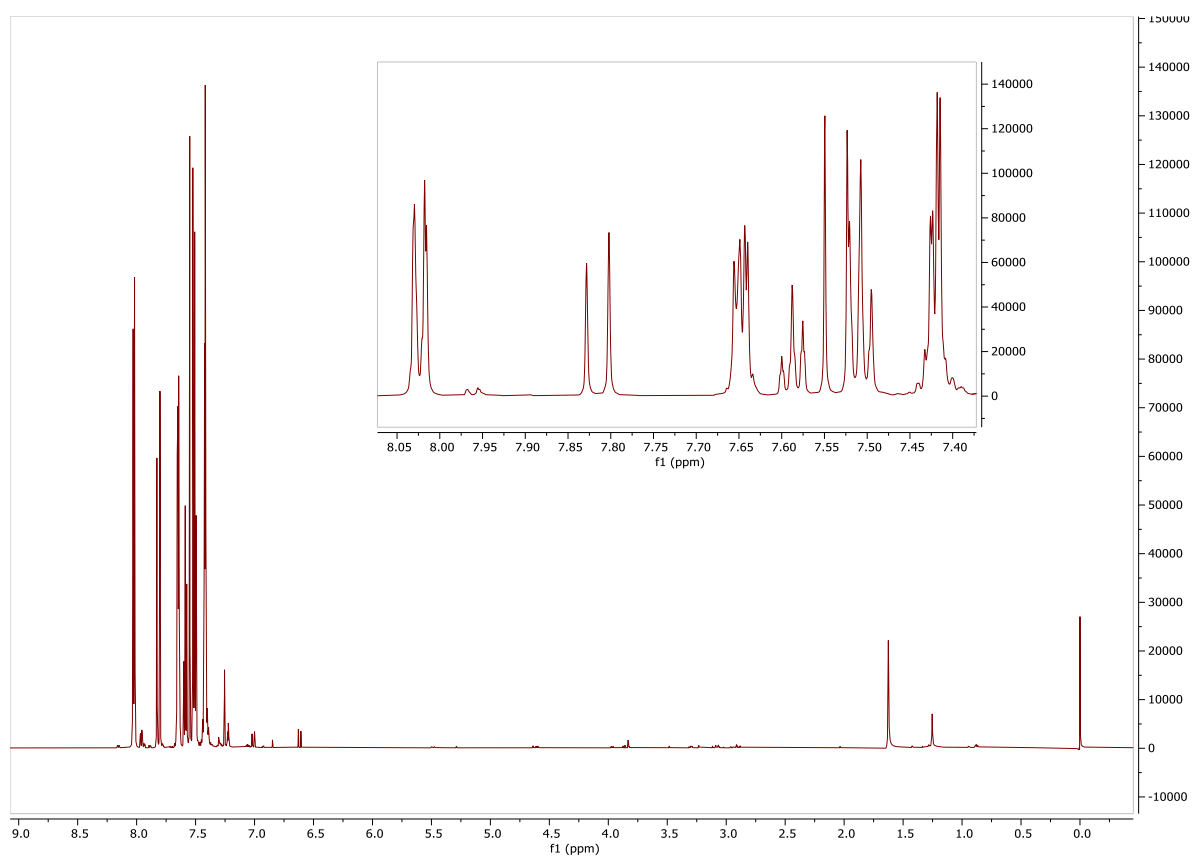

Figure S29. <sup>1</sup>H-NMR (600.19 MHz, CHCl<sub>3</sub>-d) of compound 5.



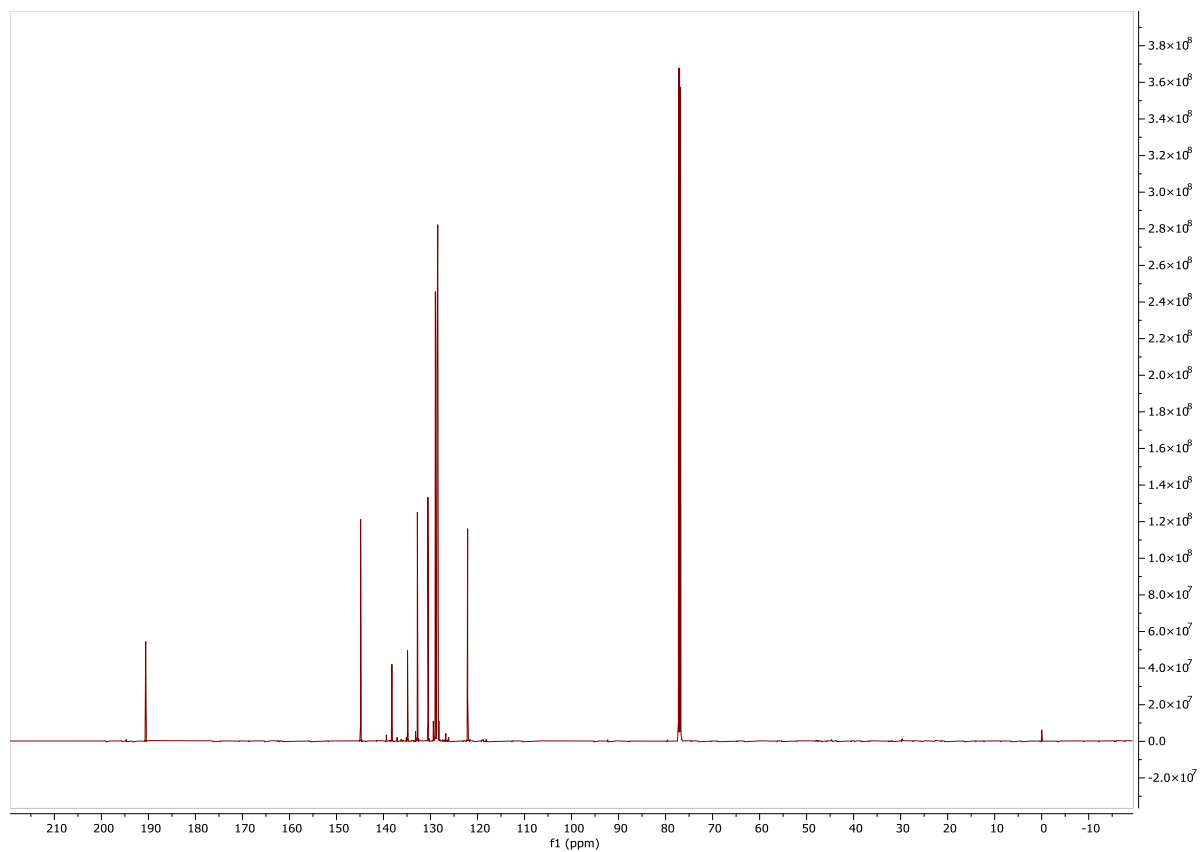

Figure S30.  $^{13}\text{C}$ -NMR (150.91 MHz,  $\text{CHCl}_3$ -*d*) of compound 5.

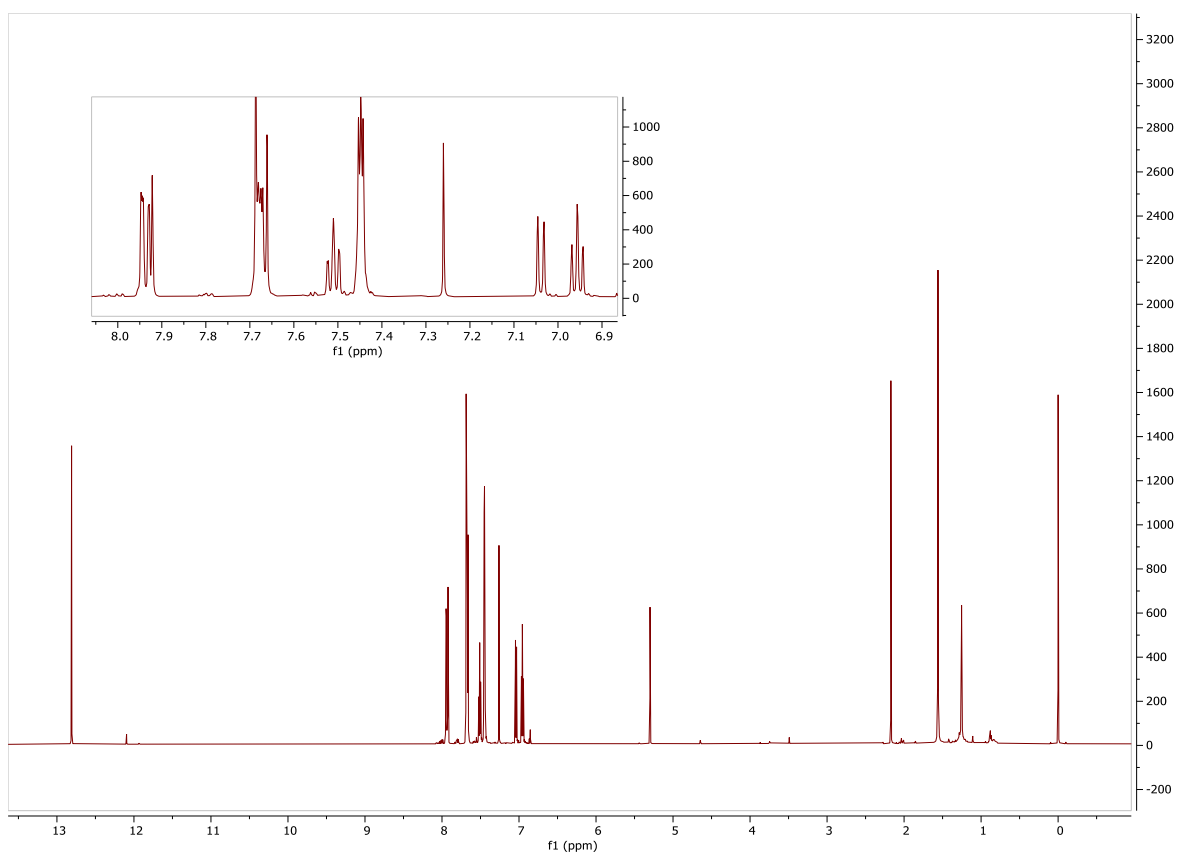

Figure S31. <sup>1</sup>H-NMR (600.19 MHz, CHCl<sub>3</sub>-*d*) of compound 6.

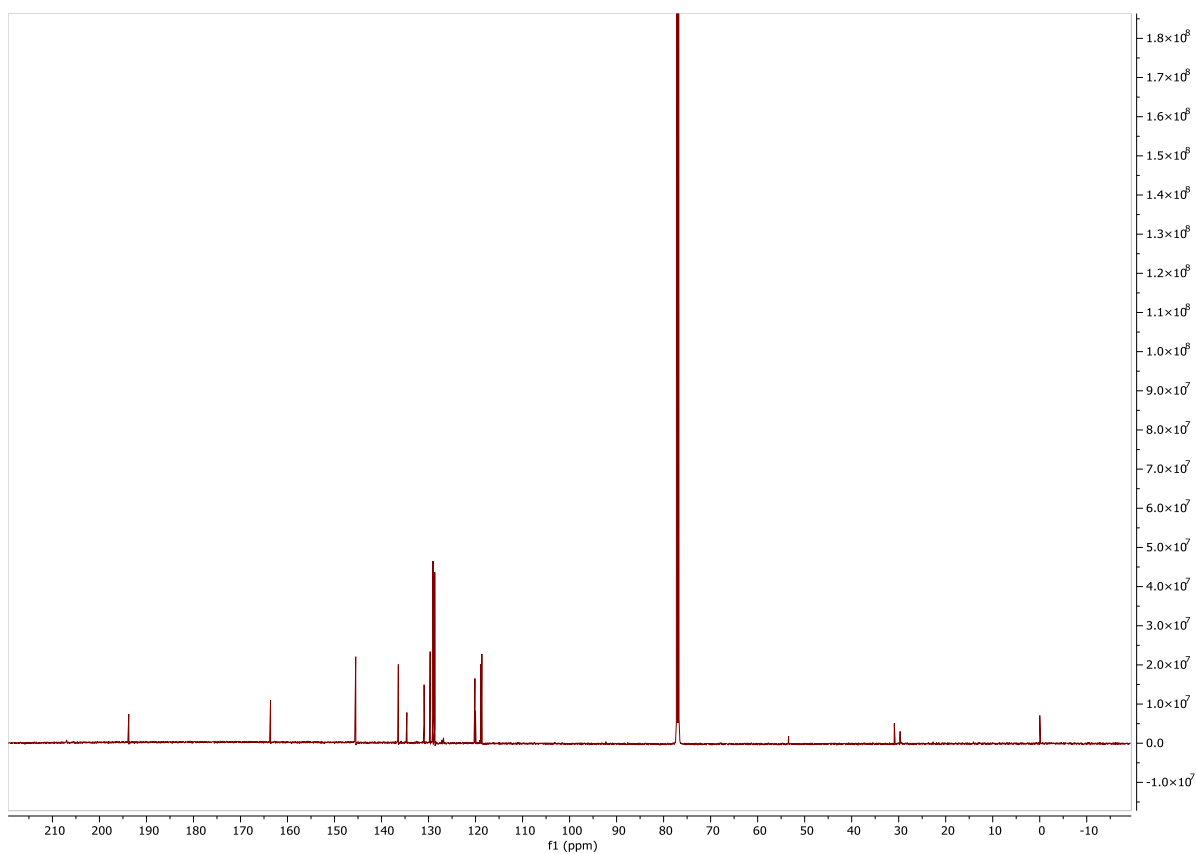

Figure S32.  $^{13}\text{C}$ -NMR (150.91 MHz,  $\text{CHCl}_3$ -*d*) of compound 6.

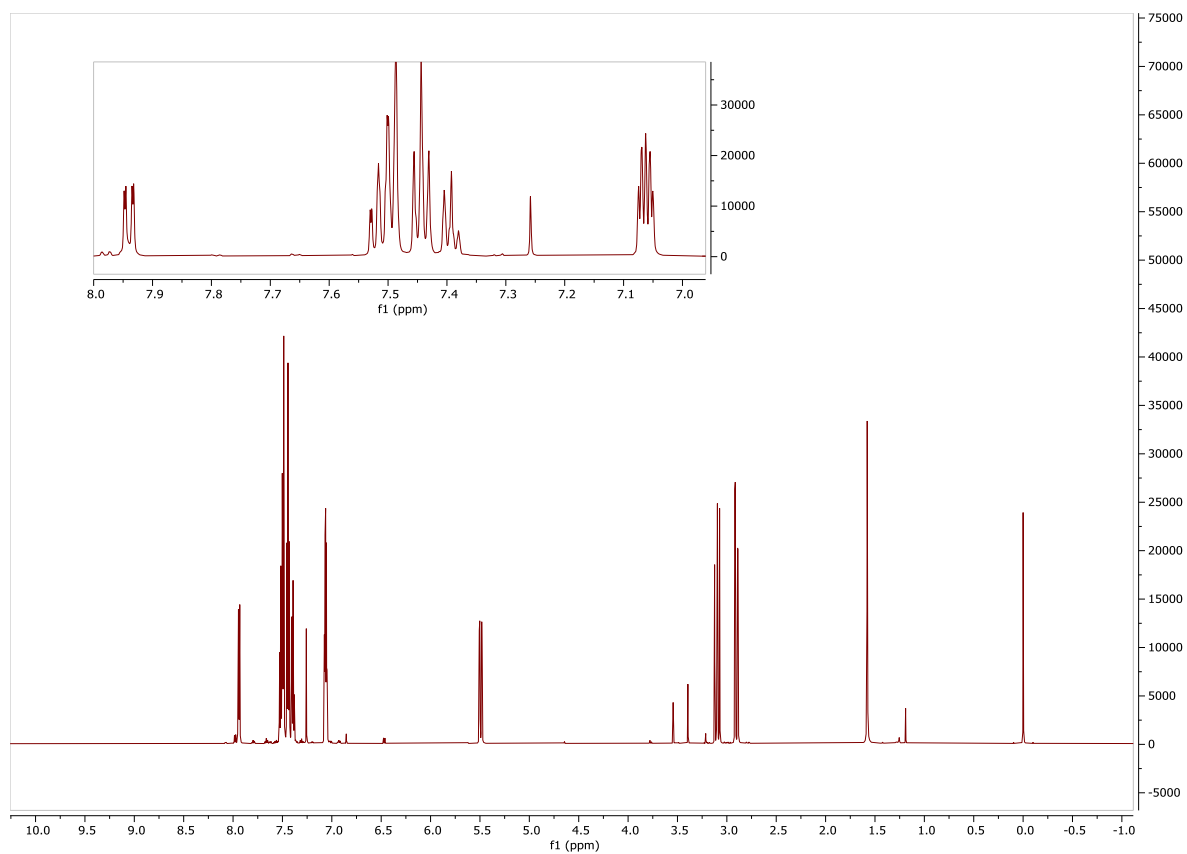

Figure S33.  $^1\text{H-NMR}$  (600.19 MHz,  $\text{CHCl}_3-d$ ) of compound 7.

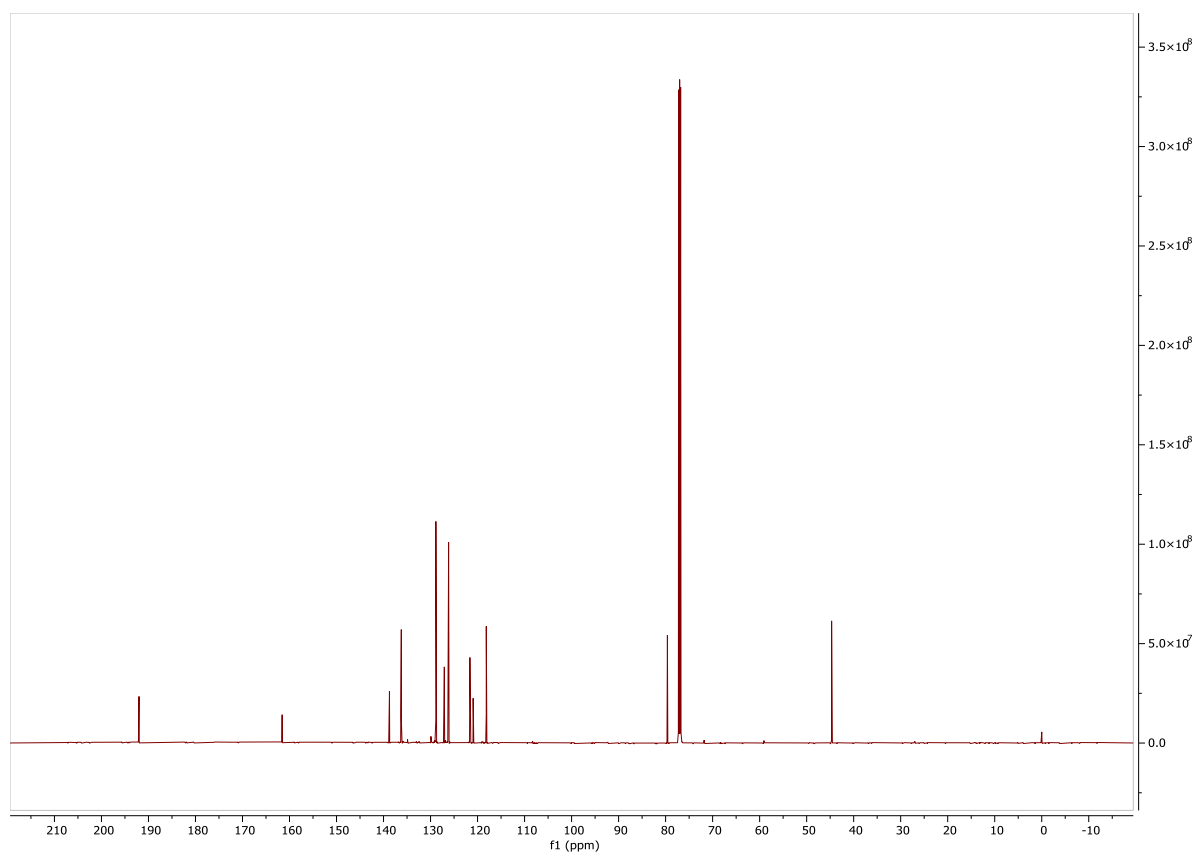

Figure S34.  $^{13}\text{C}$ -NMR (150.91 MHz,  $\text{CHCl}_3$ -*d*) of compound 7.

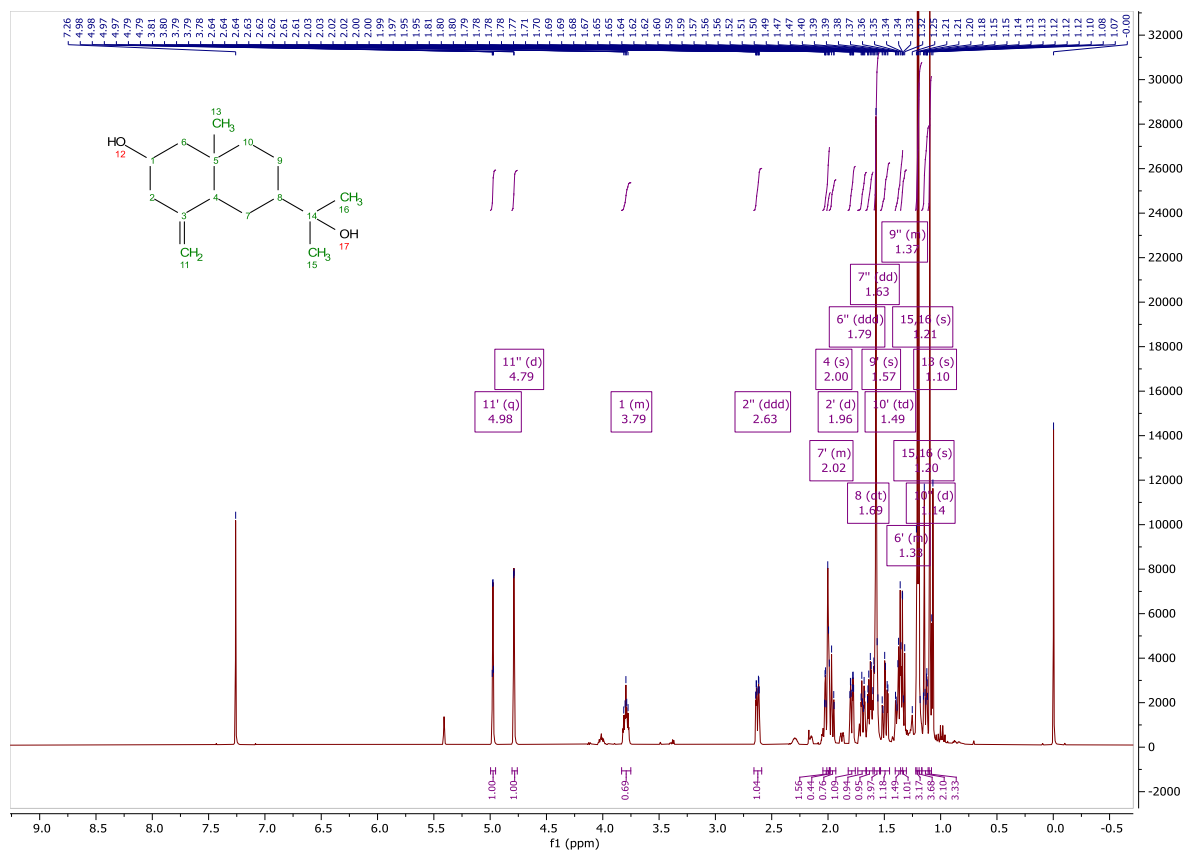

Figure S35. <sup>1</sup>H-NMR (600.19 MHz, CHCl<sub>3</sub>-*d*) of compound 8.

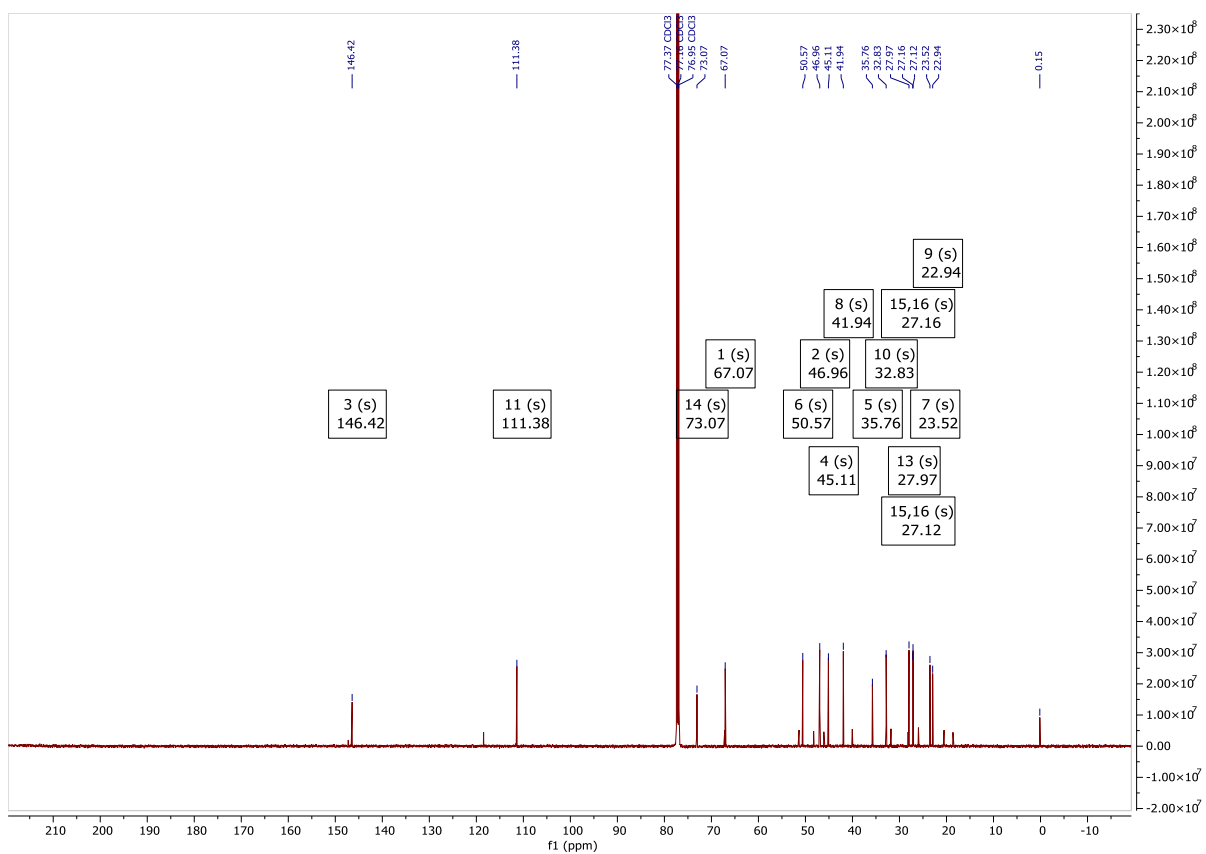

Figure S36.  $^{13}\text{C}$ -NMR (150.91 MHz,  $\text{CHCl}_3$ -*d*) of compound 8.

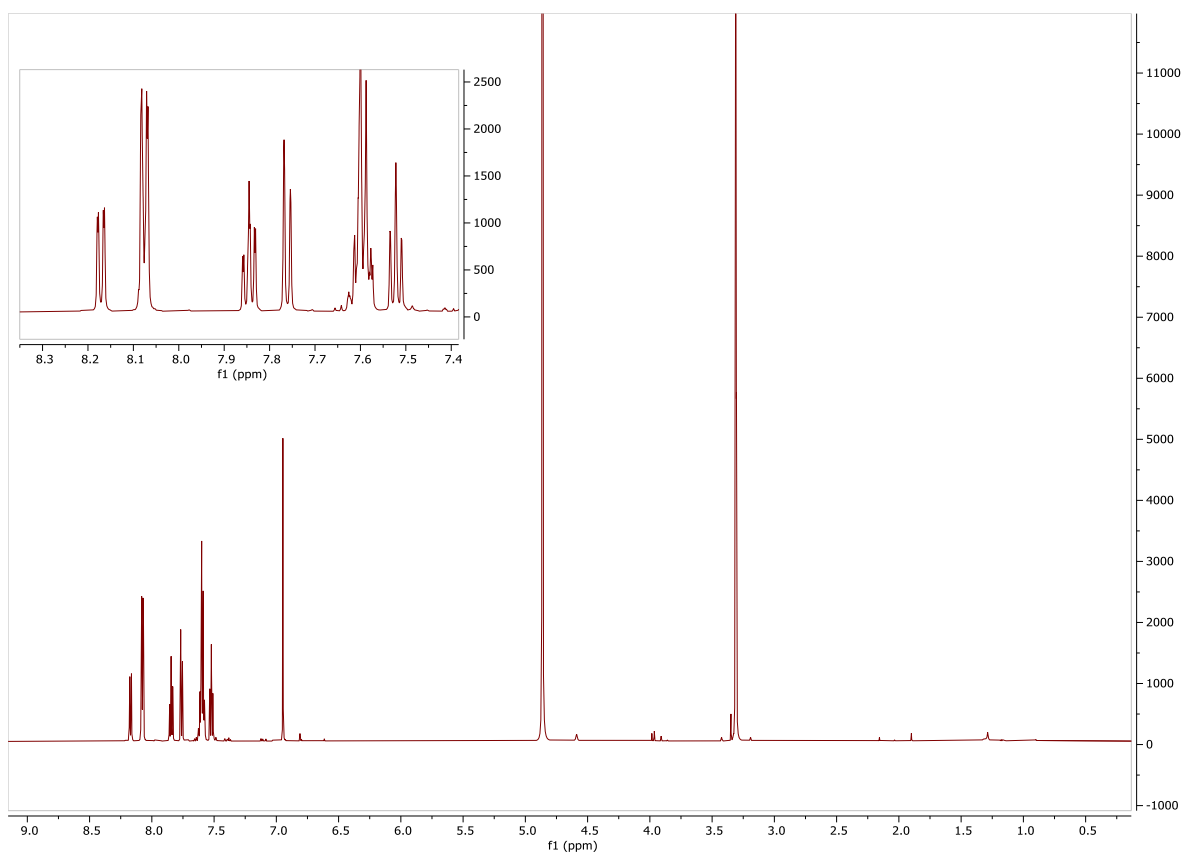

**Figure S37.**  $^1\text{H-NMR}$  (600.19 MHz,  $\text{MeOH-}d_4$ ) of compound 9.



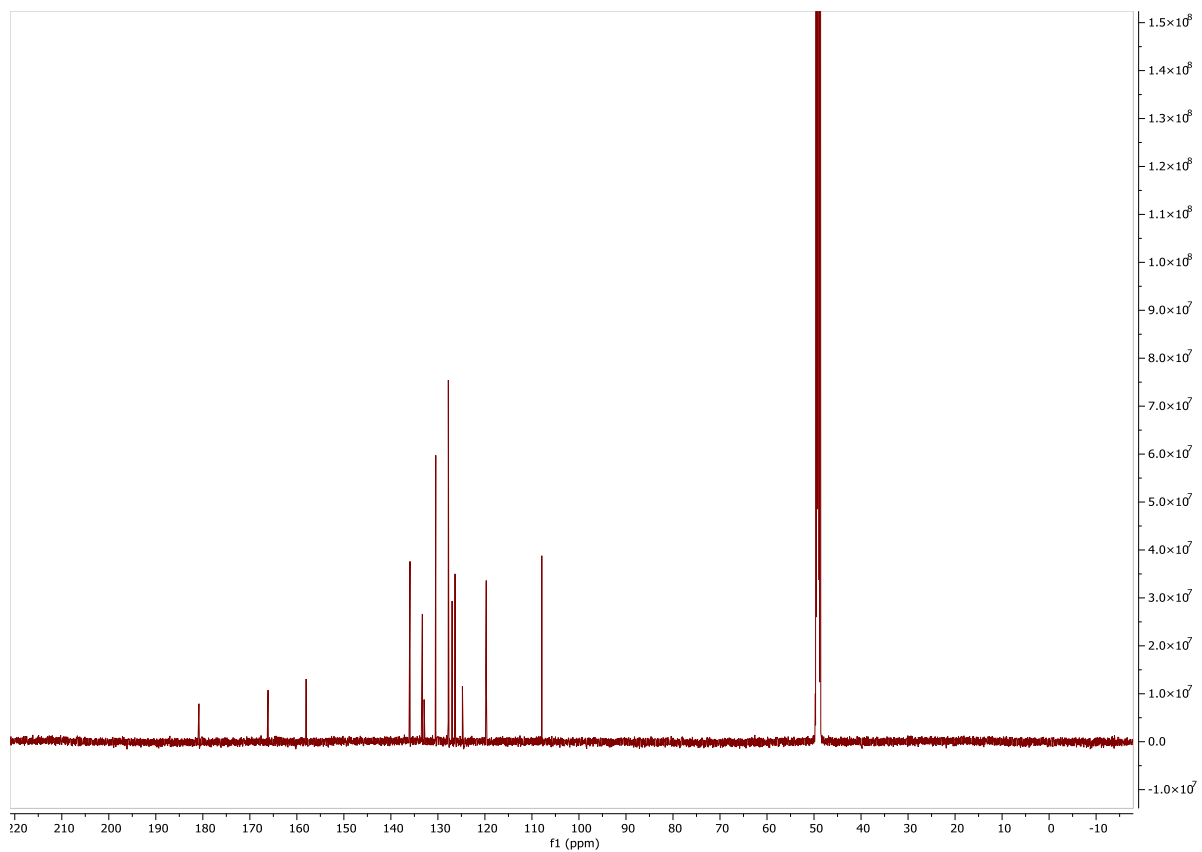

Figure S38.  $^{13}\text{C}$ -NMR (150.91 MHz,  $\text{MeOH-}d_4$ ) of compound 9.

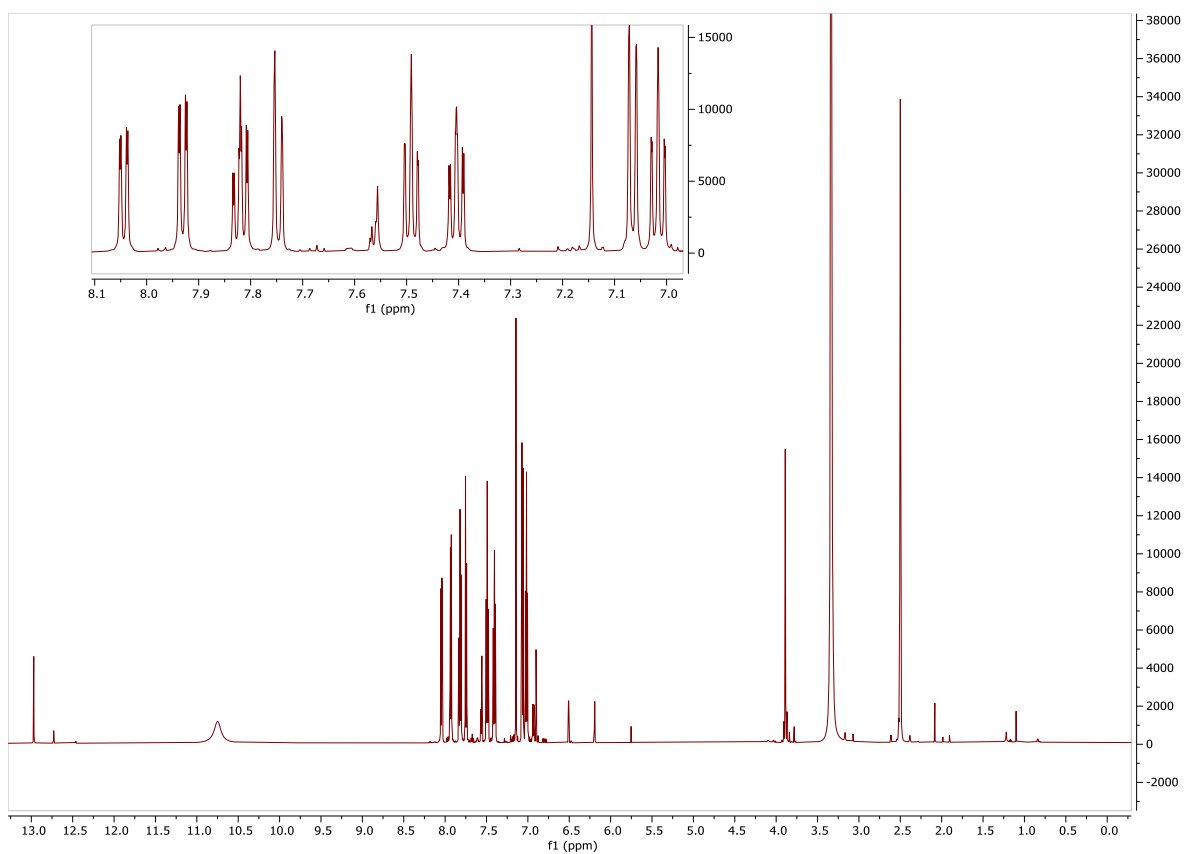

Figure S39. <sup>1</sup>H-NMR (600.19 MHz, DMSO-*d*<sub>6</sub>) of compound 10.

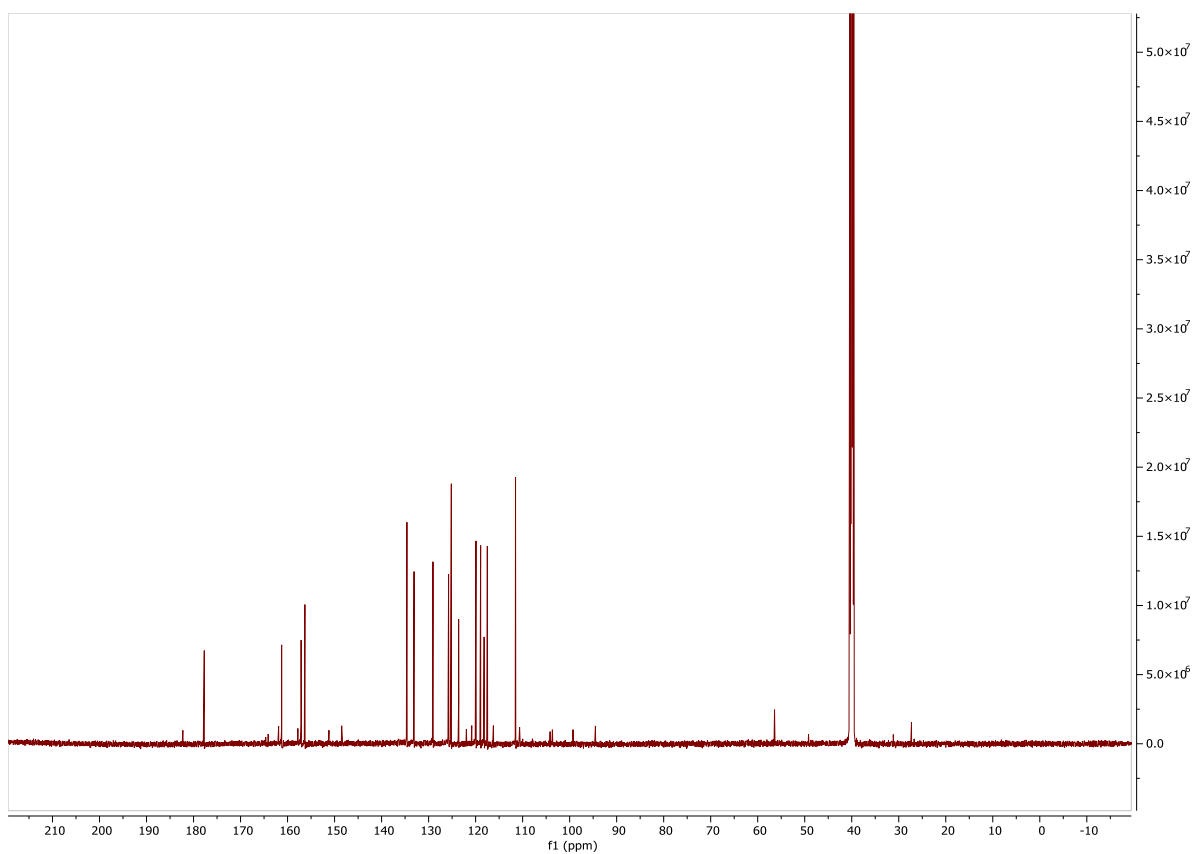

Figure S40.  $^{13}\text{C}$ -NMR (150.91 MHz,  $\text{DMSO-}d_6$ ) of compound 10.

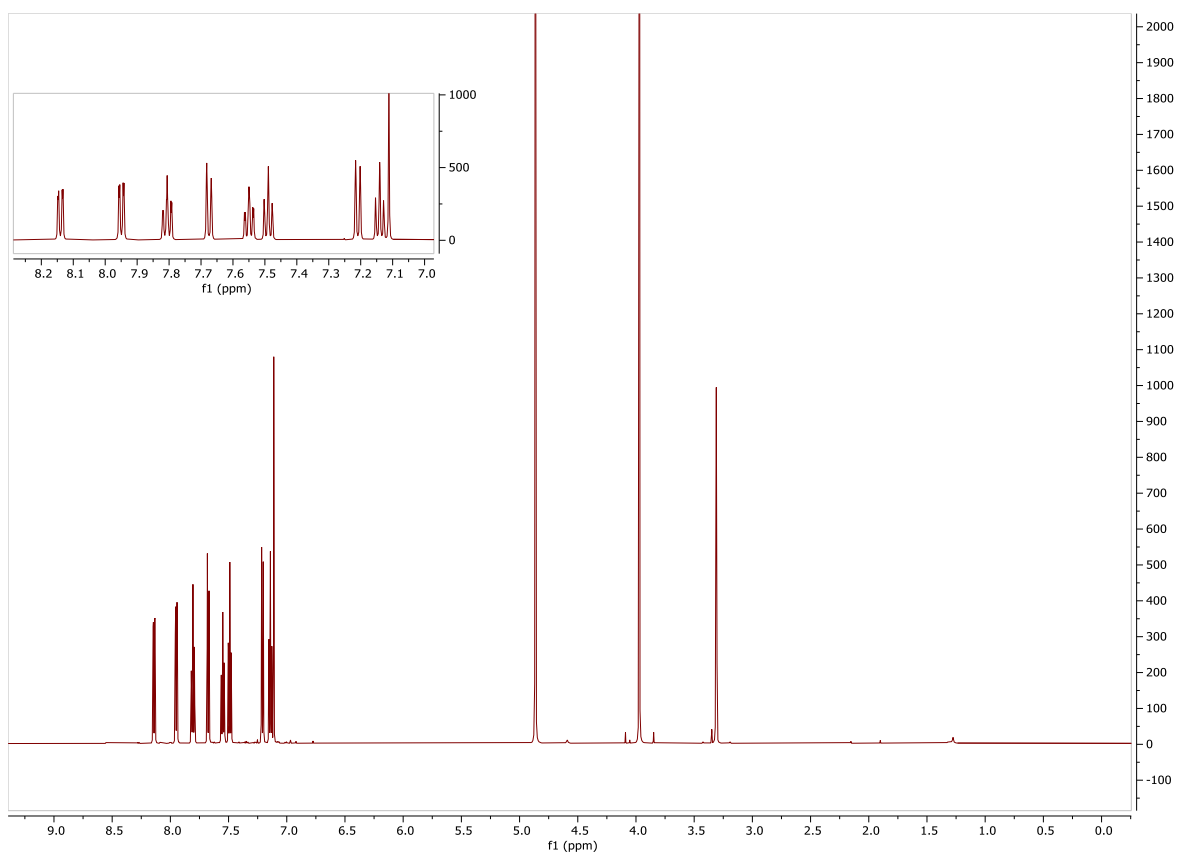

Figure S41.  $^1\text{H-NMR}$  (600.19 MHz,  $\text{MeOH-}d_4$ ) of compound 11.

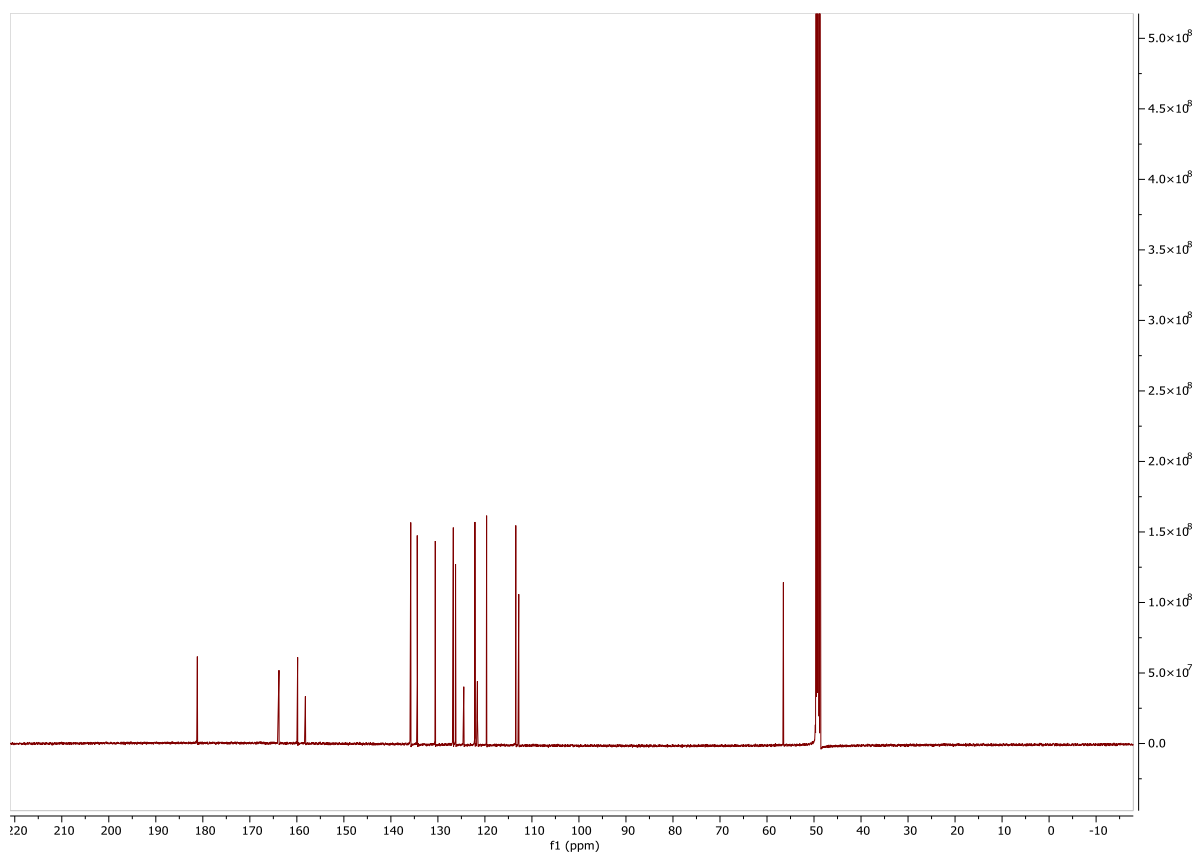

Figure S42.  $^{13}\text{C}$ -NMR (150.91 MHz,  $\text{MeOH-}d_4$ ) of compound 11.

Figure S43.  $^1\text{H-NMR}$  (600.19 MHz,  $\text{MeOH-}d_4$ ) of compound 12.

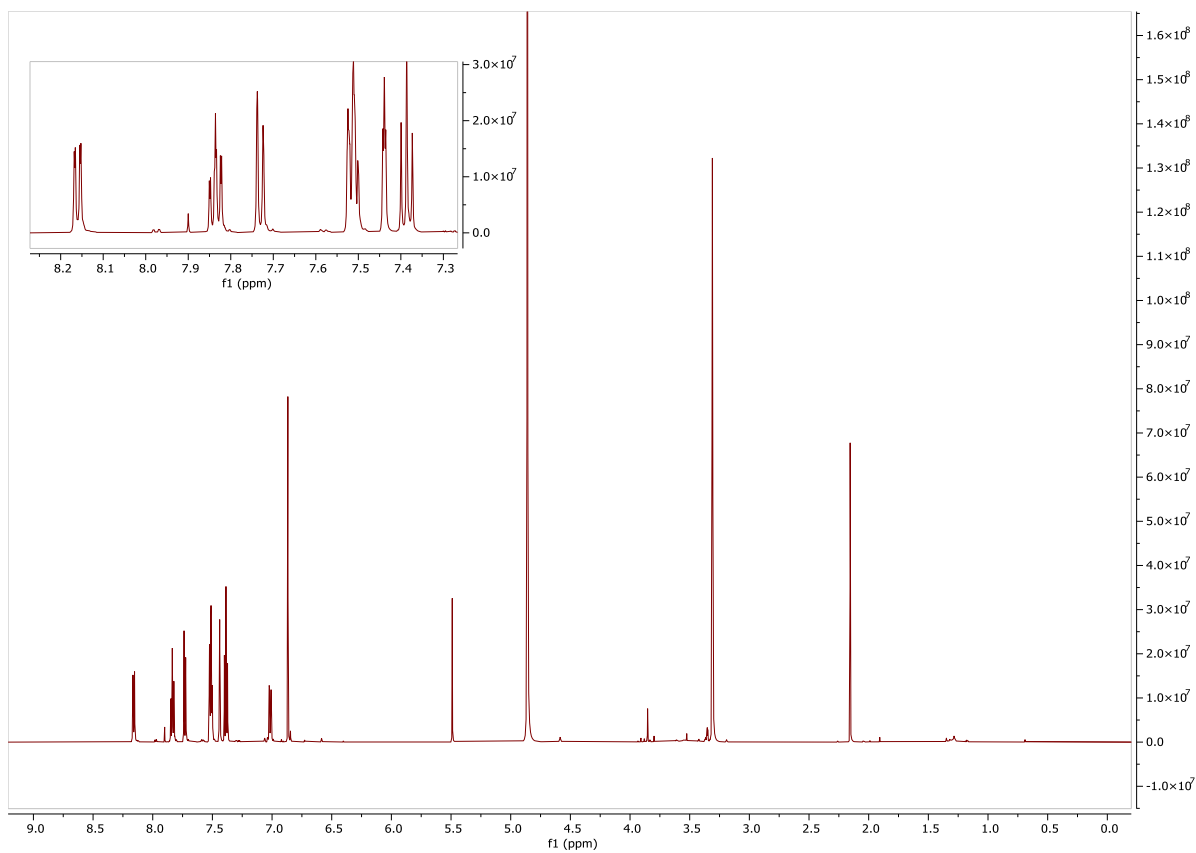

Figure S44.  $^{13}\text{C}$ -NMR (150.91 MHz,  $\text{MeOH-}d_4$ ) of compound 12.

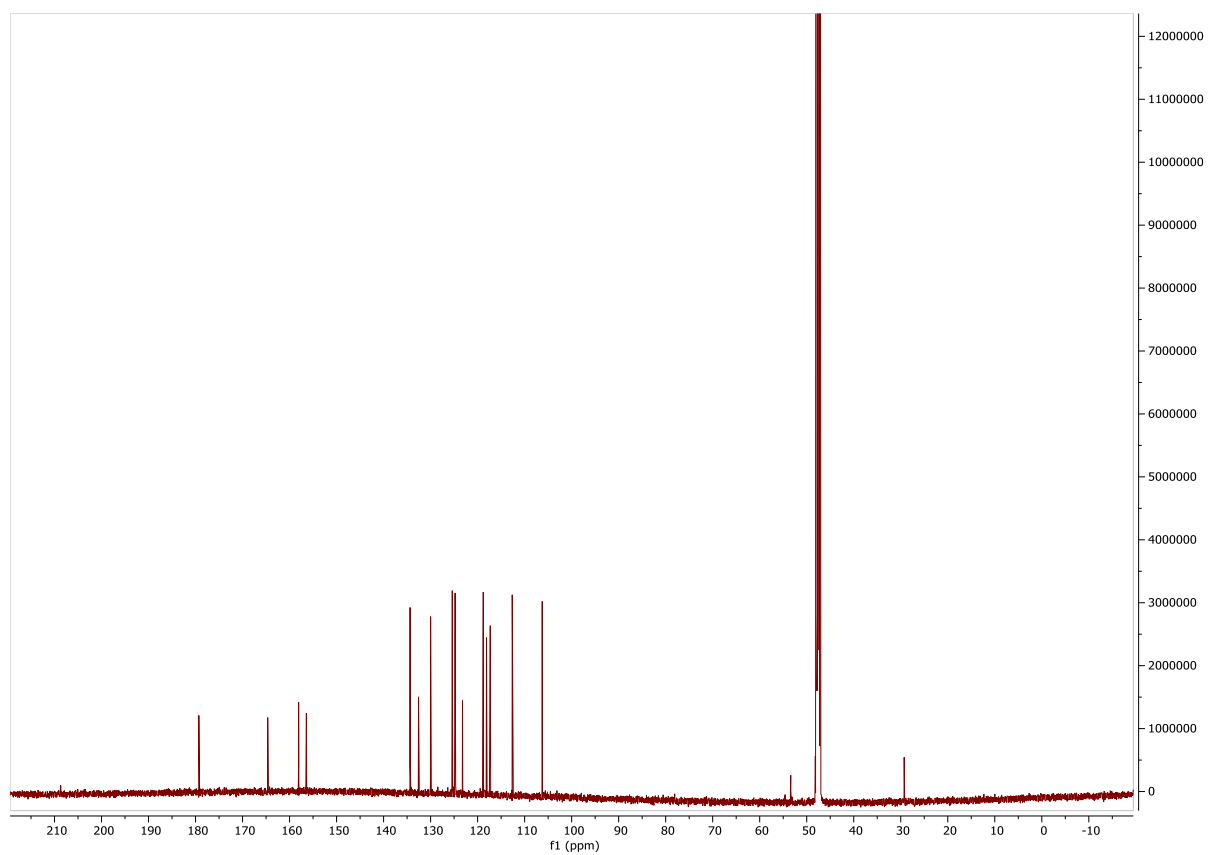

Figure S45.  $^1\text{H-NMR}$  (600.19 MHz,  $\text{MeOH-}d_4$ ) of compound 13.

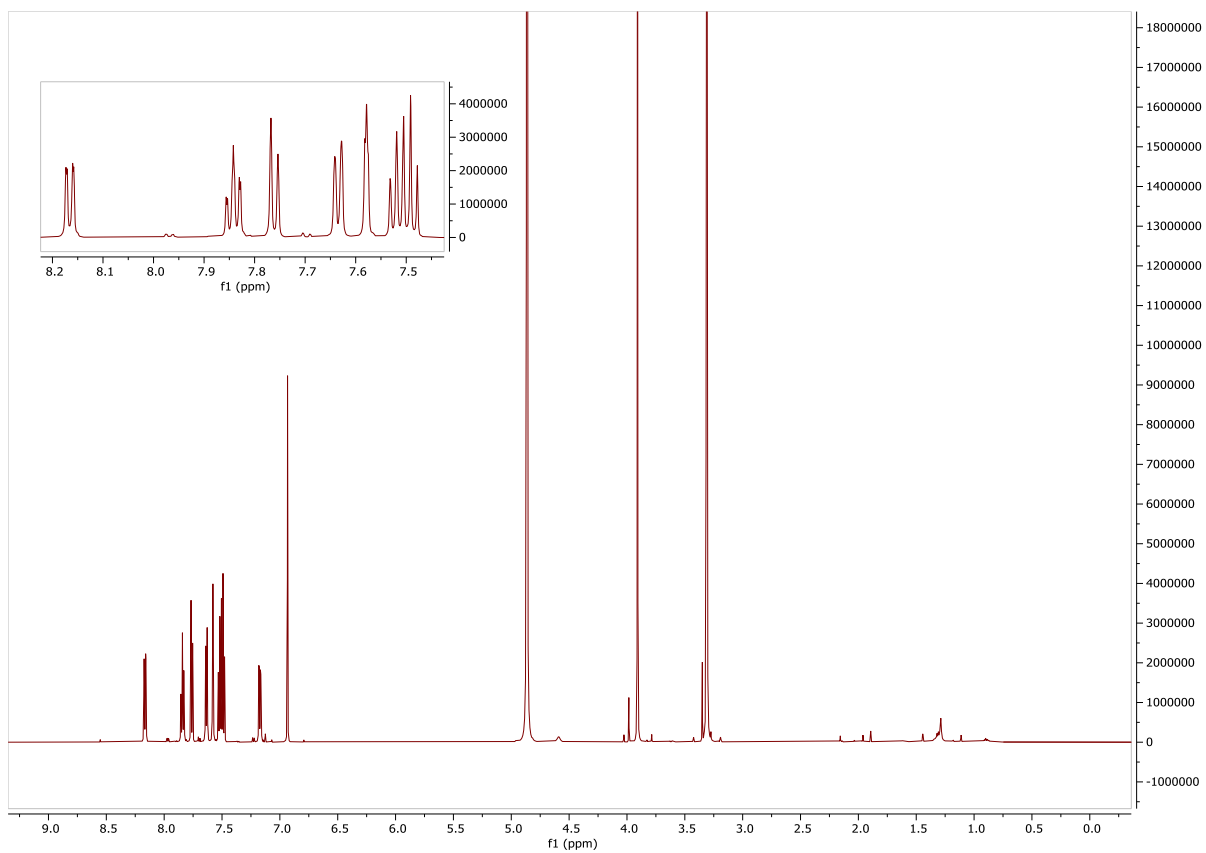



Figure S46.  $^{13}\text{C}$ -NMR (150.91 MHz,  $\text{MeOH-}d_4$ ) of compound 13.

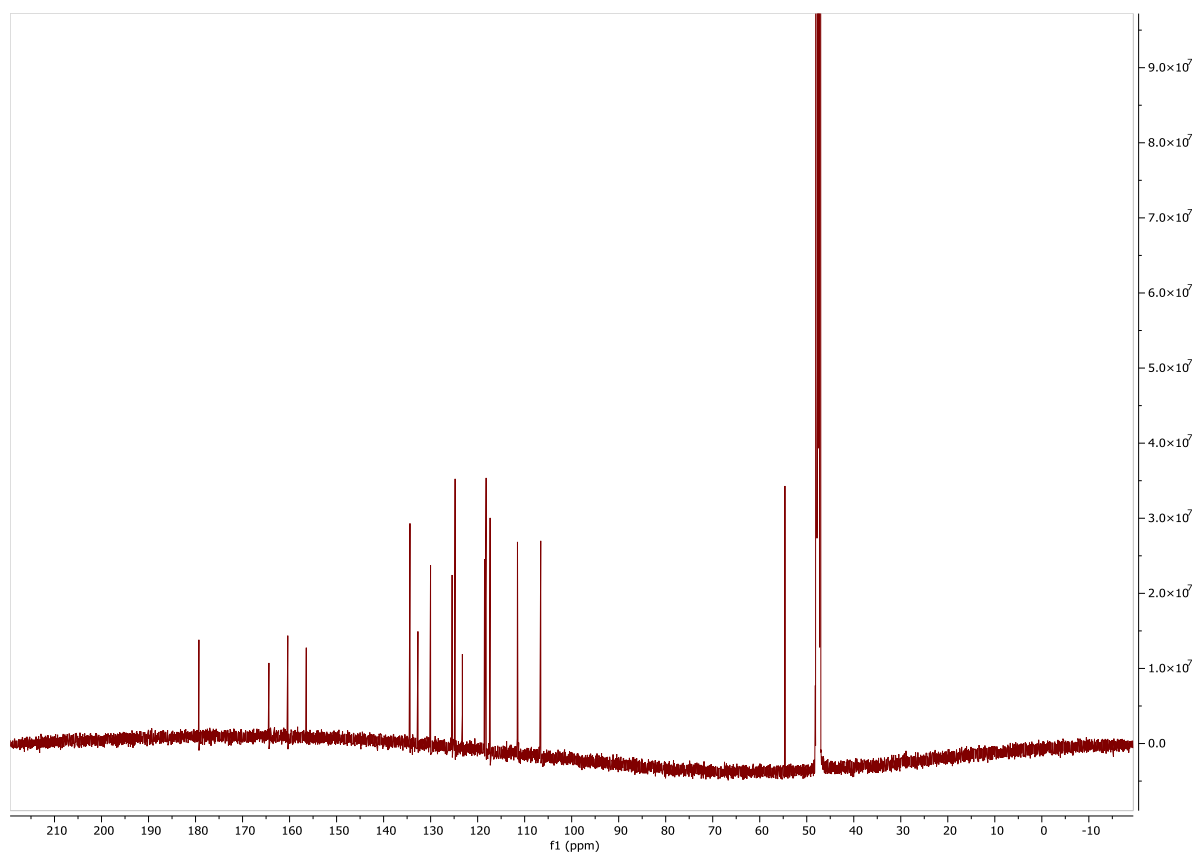

Figure S47.  $^1\text{H-NMR}$  (600.19 MHz, Acetone- $d_6$ ) of compound 14.

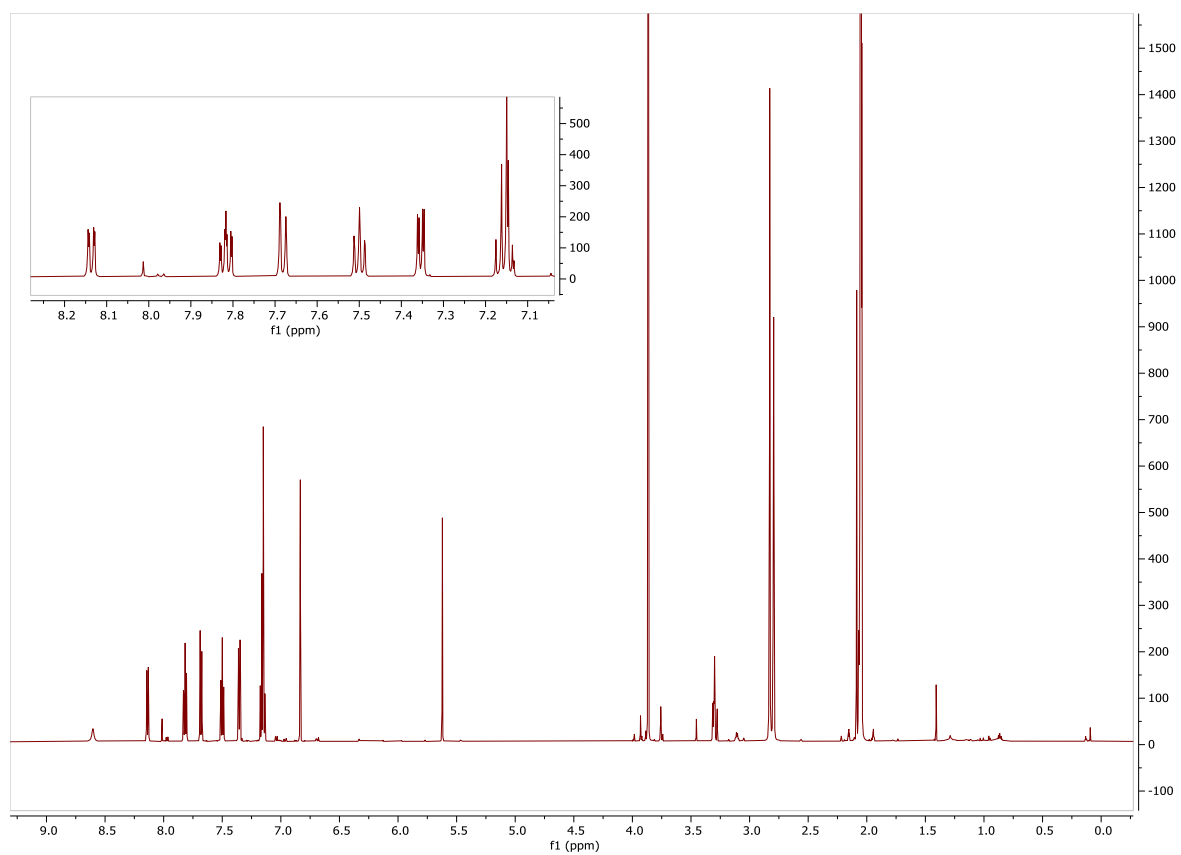

Figure S48.  $^{13}\text{C}$ -NMR (150.91 MHz, Acetone- $d_6$ ) of compound 14.

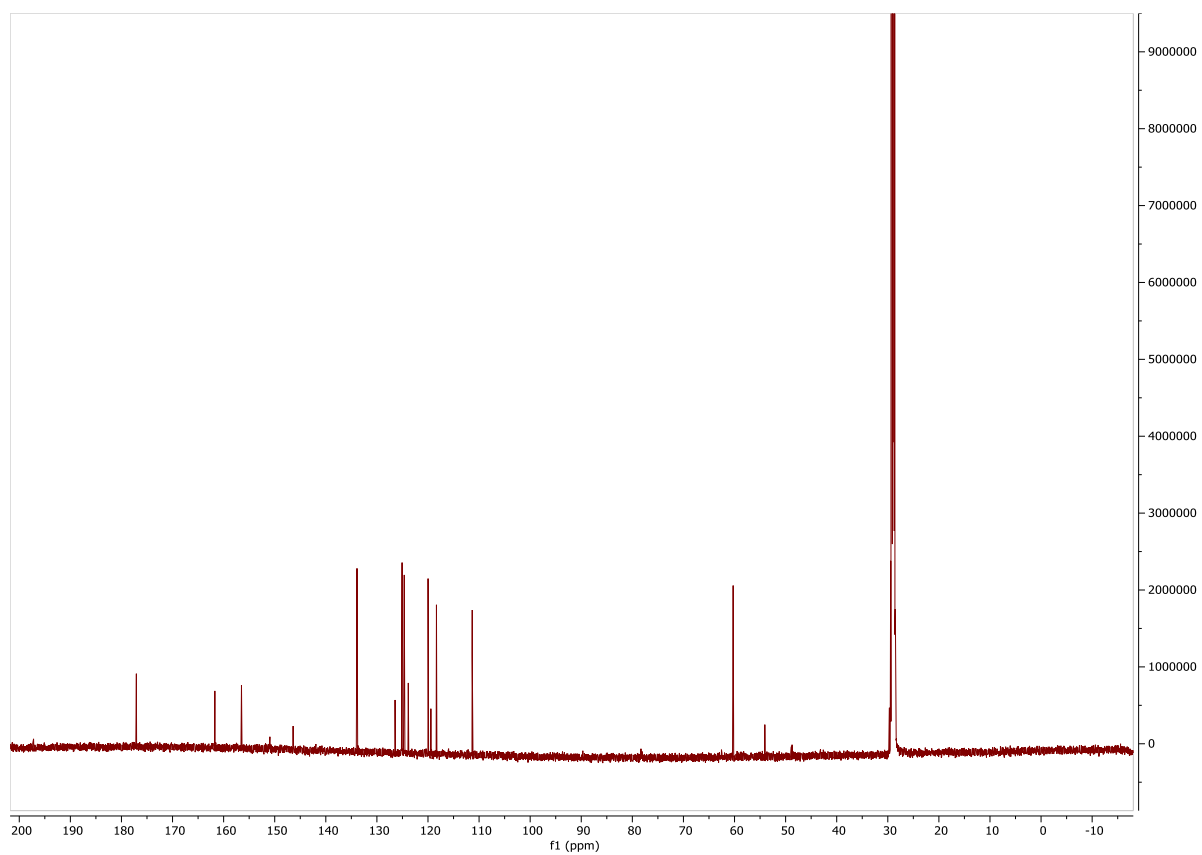

Figure S49.  $^1\text{H-NMR}$  (600.19 MHz,  $\text{DMSO-}d_6$ ) of compound 15.

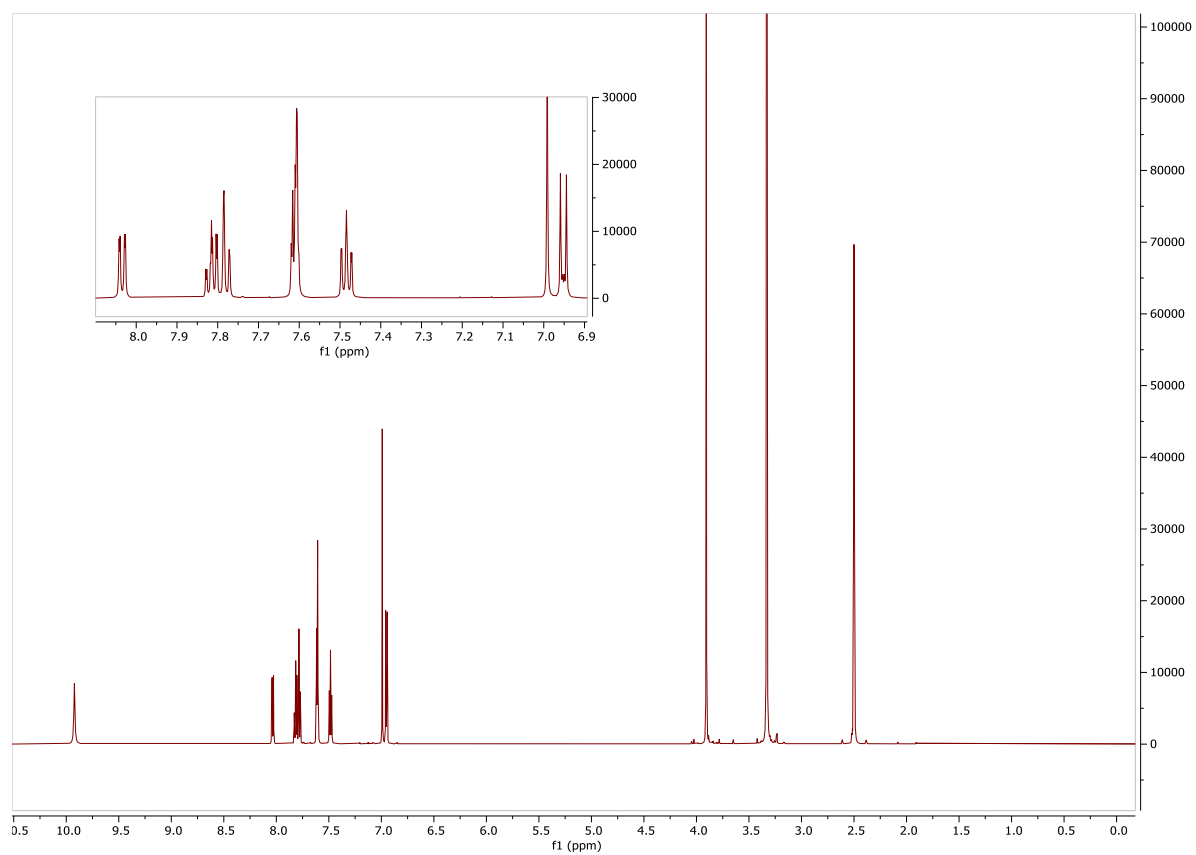

Figure S50.  $^{13}\text{C}$ -NMR (150.91 MHz,  $\text{DMSO-}d_6$ ) of compound 15.

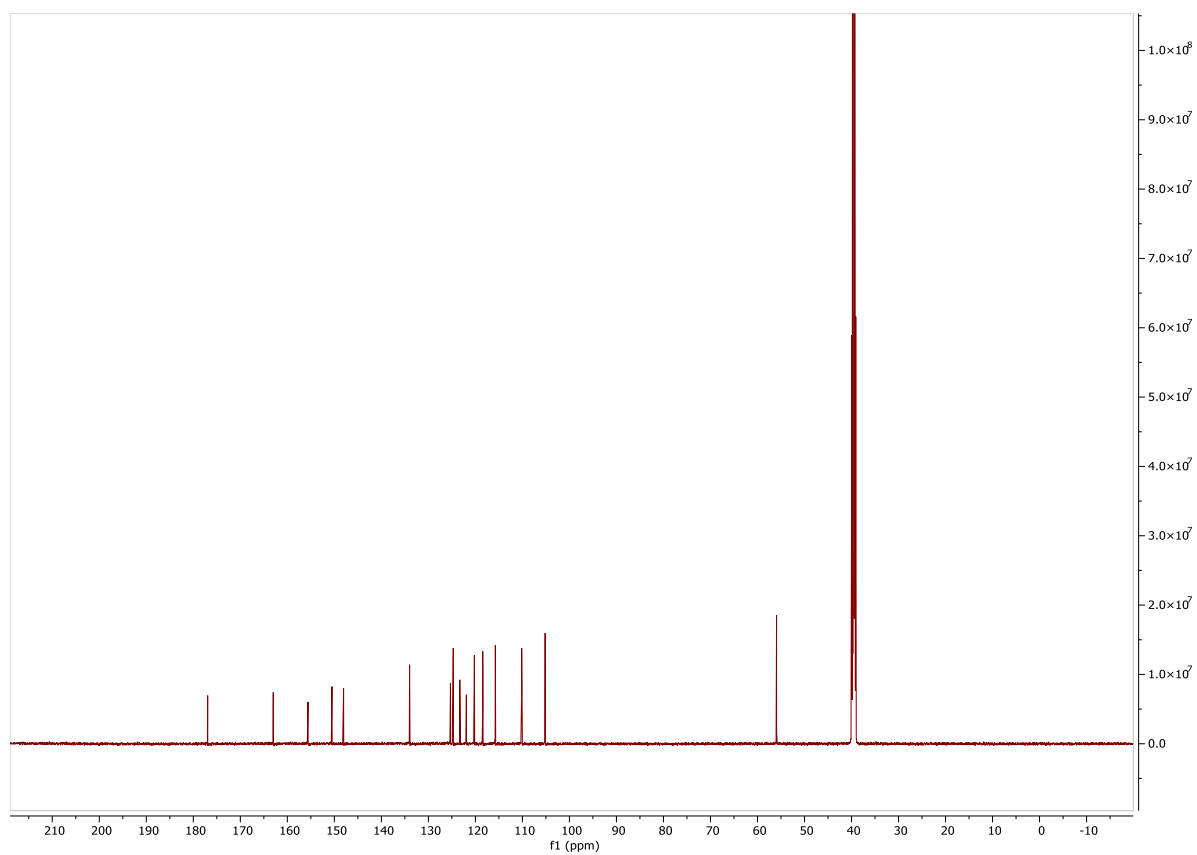

Figure S51.  $^1\text{H-NMR}$  (600.19 MHz,  $\text{DMSO-}d_6$ ) of compound 16.

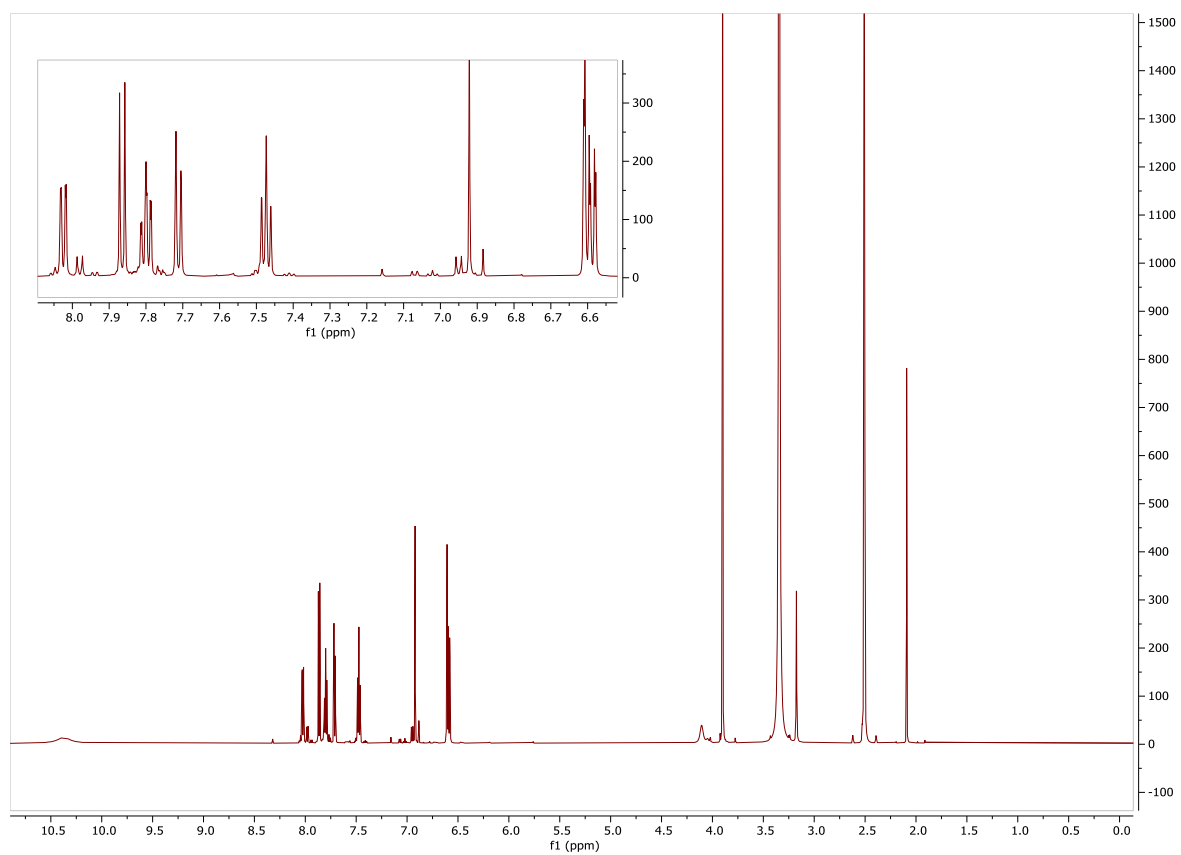

Figure S52.  $^{13}\text{C}$ -NMR (150.91 MHz,  $\text{DMSO-}d_6$ ) of compound 16.

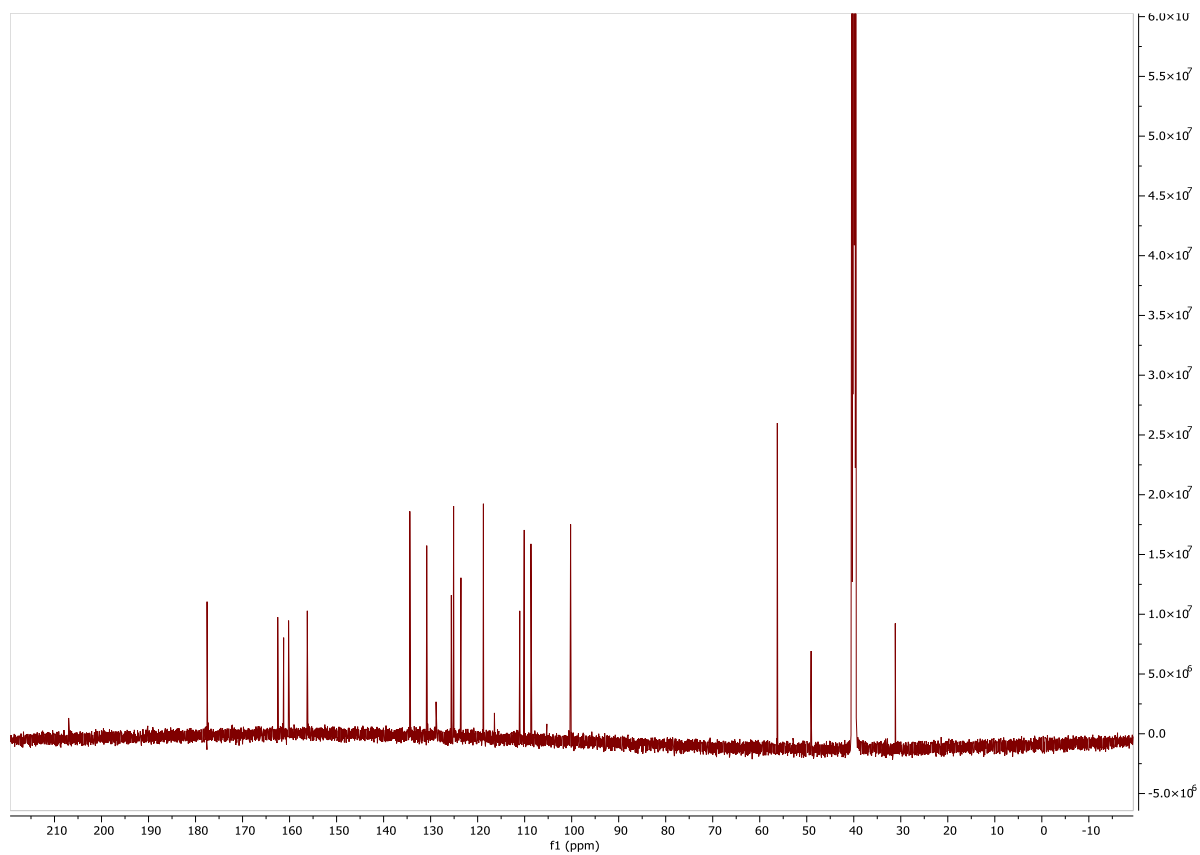

Figure S53.  $^1\text{H-NMR}$  (600.19 MHz,  $\text{CHCl}_3-d$ ) of compound 17.

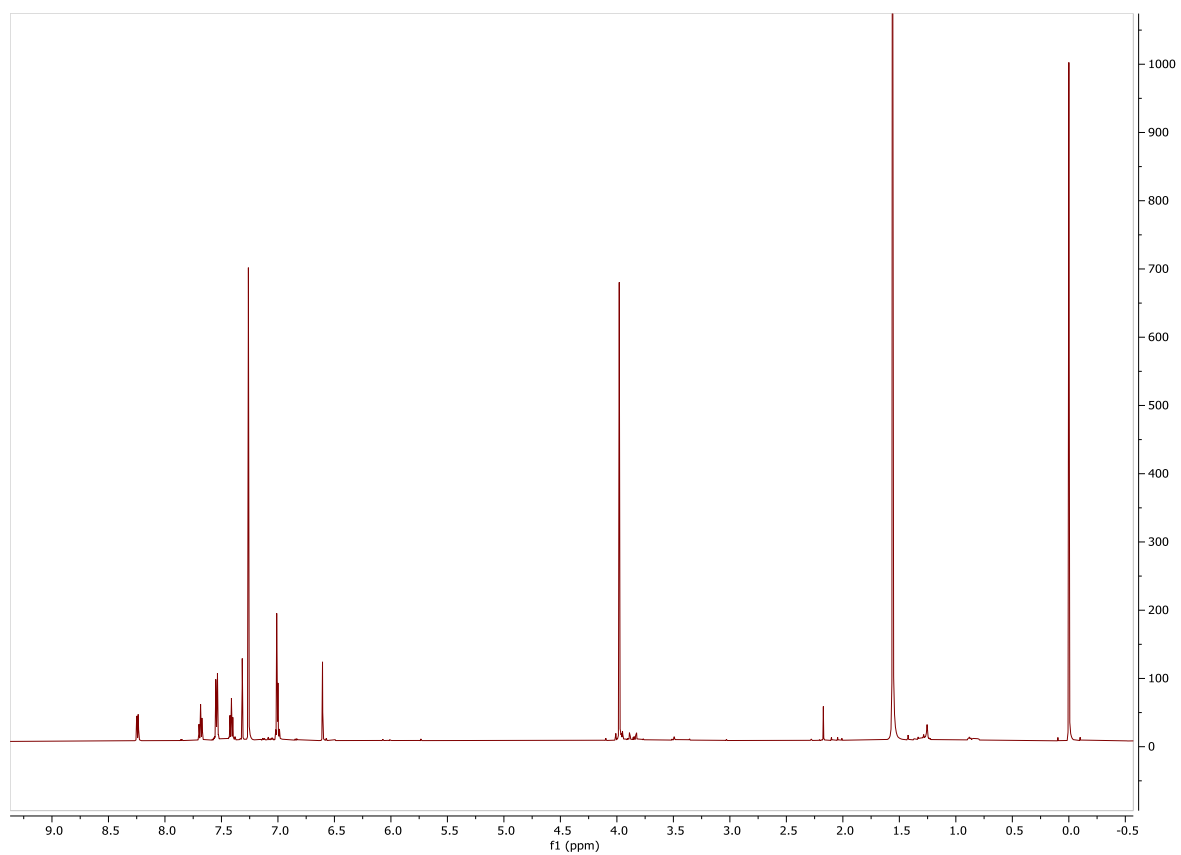



Figure S54.  $^{13}\text{C}$ -NMR (150.91 MHz,  $\text{CHCl}_3$ -*d*) of compound 17.

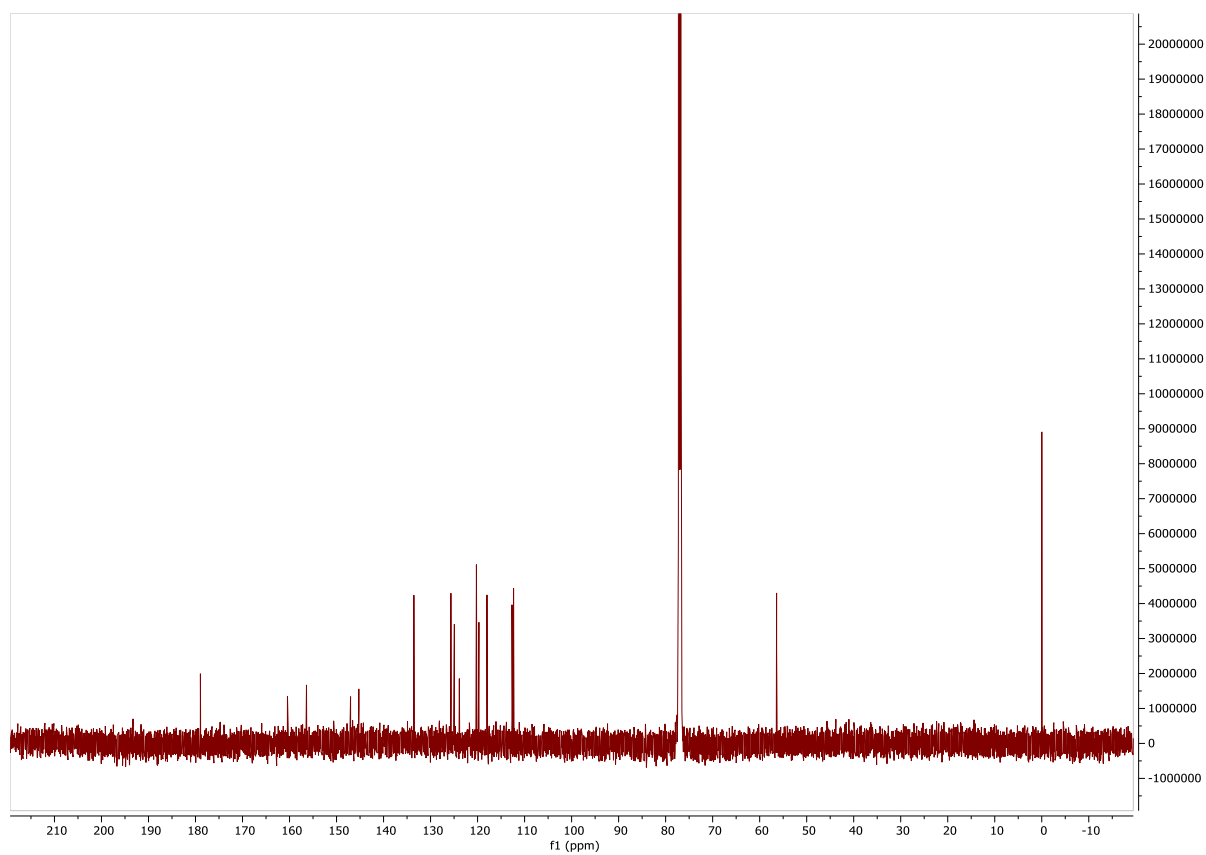

Figure S55.  $^1\text{H-NMR}$  (600.19 MHz,  $\text{CHCl}_3-d$ ) of compound 18.

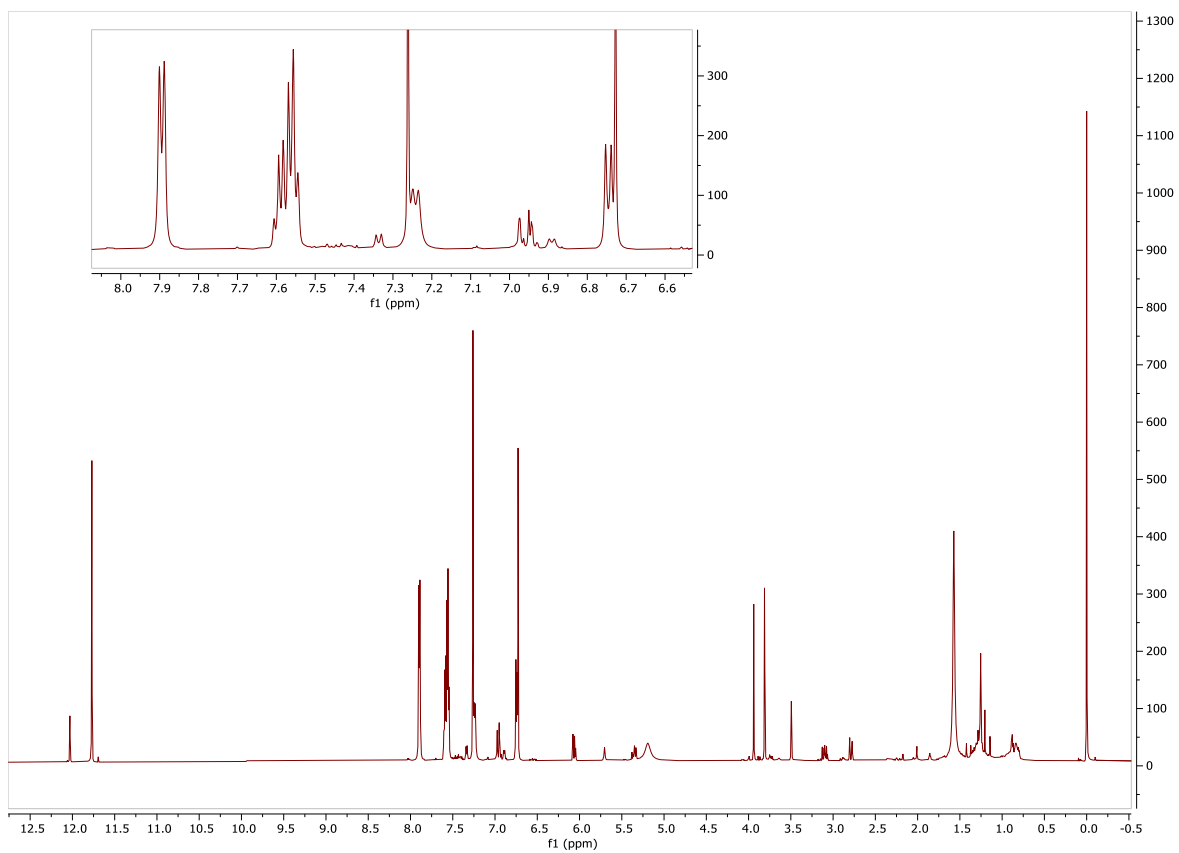

Figure S56.  $^{13}\text{C}$ -NMR (150.91 MHz,  $\text{CHCl}_3$ -*d*) of compound 18.

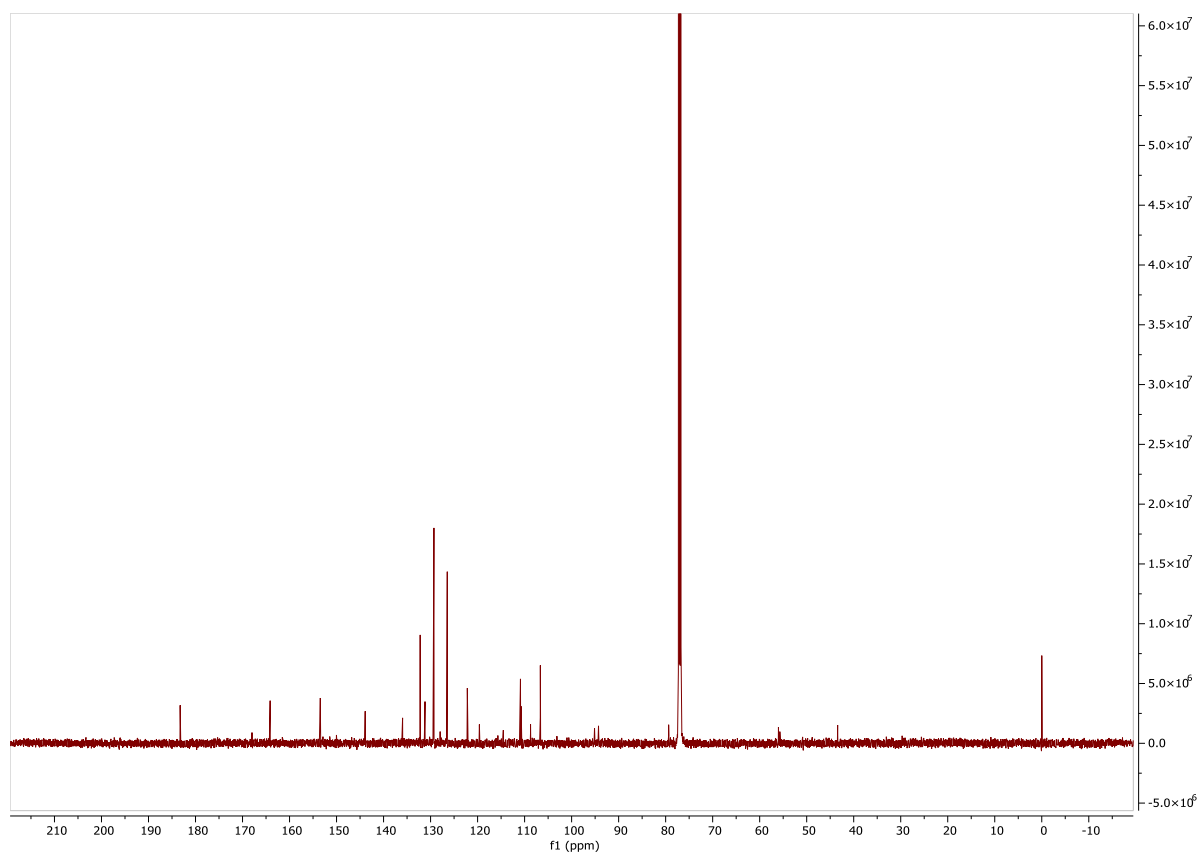

Figure S57.  $^1\text{H-NMR}$  (600.19 MHz,  $\text{DMSO-}d_6$ ) of compound 19.

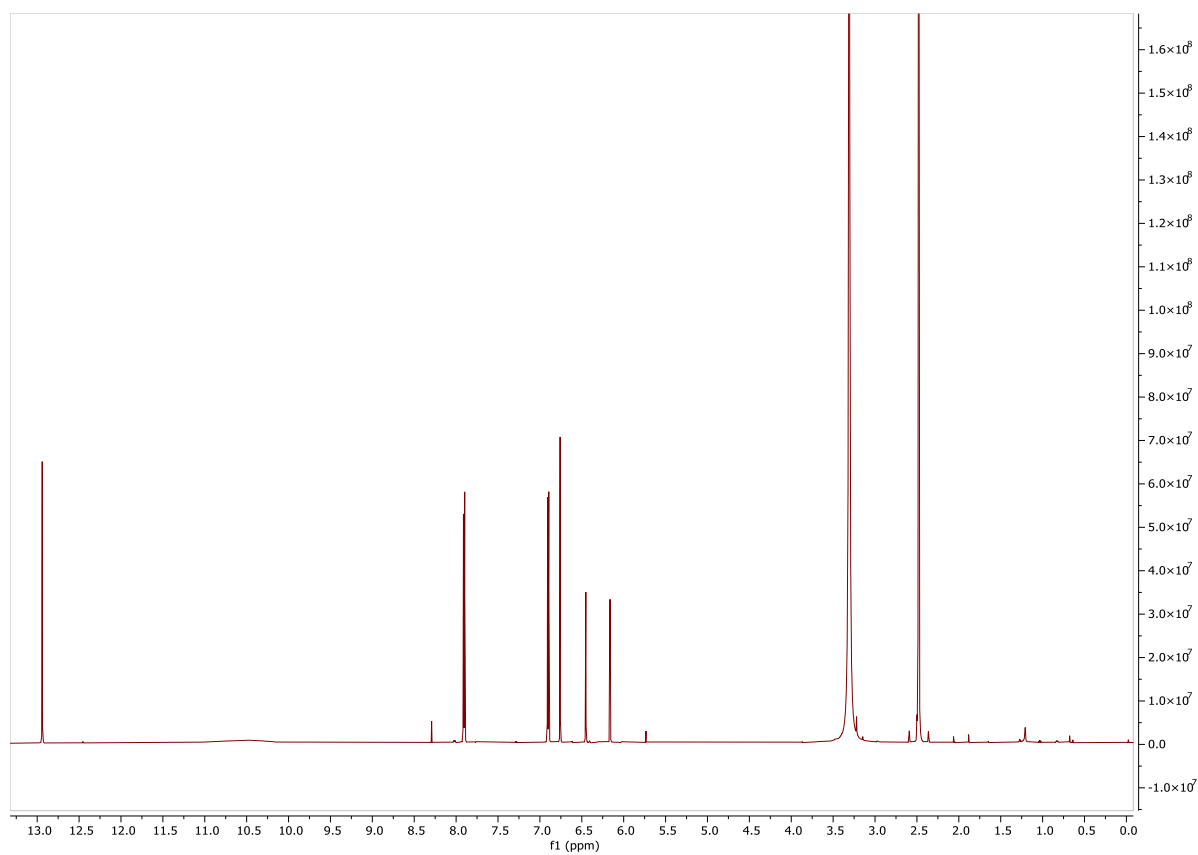

Figure S58.  $^{13}\text{C}$ -NMR (150.91 MHz,  $\text{DMSO-}d_6$ ) of compound 19.

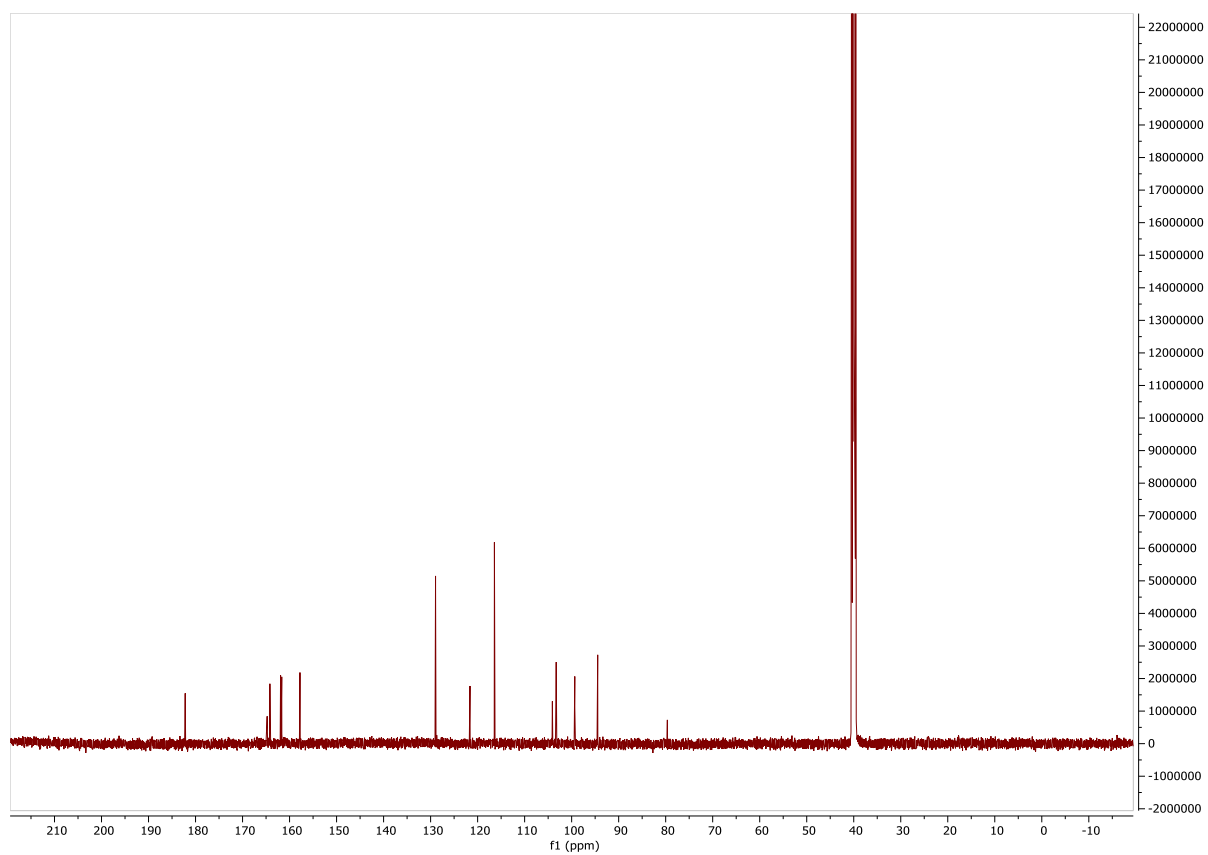

Figure S59.  $^1\text{H-NMR}$  (600.19 MHz,  $\text{DMSO-}d_6$ ) of compound 20.

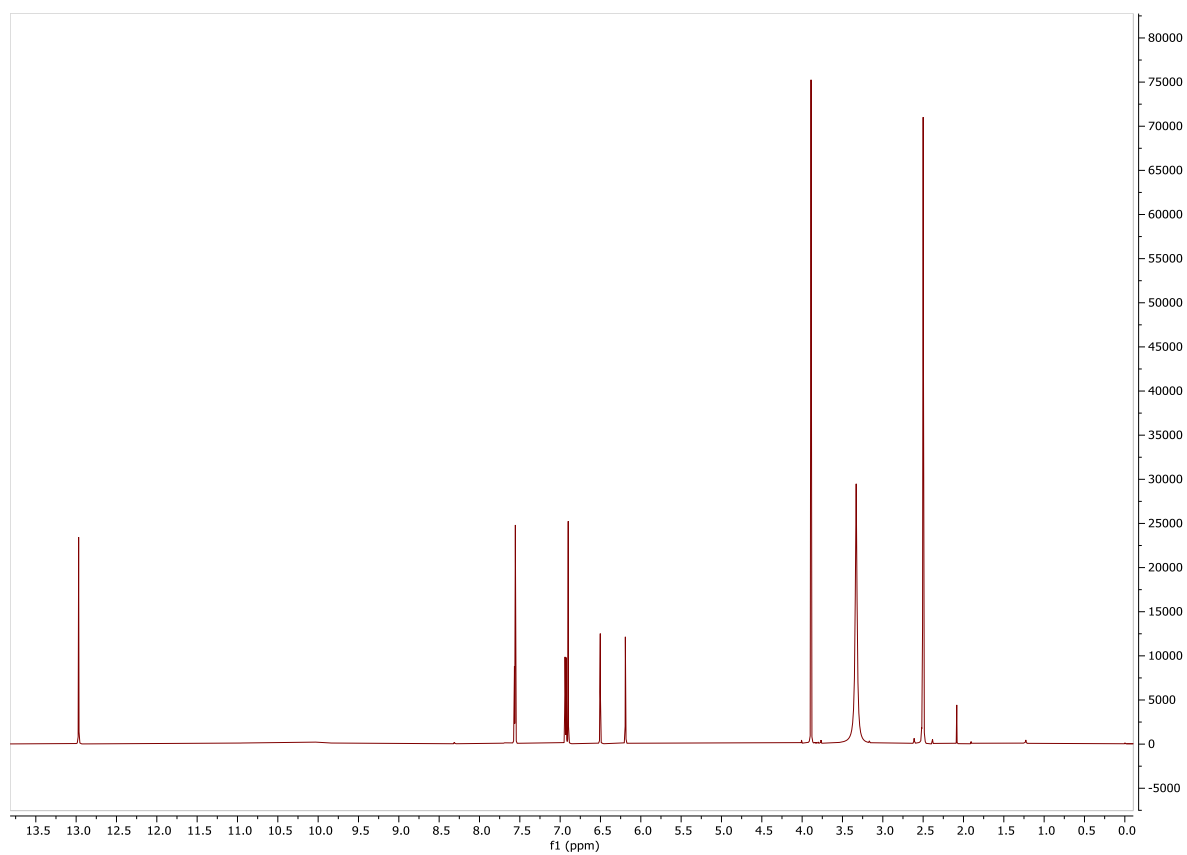

Figure S60.  $^{13}\text{C}$ -NMR (150.91 MHz,  $\text{DMSO-}d_6$ ) of compound 20.

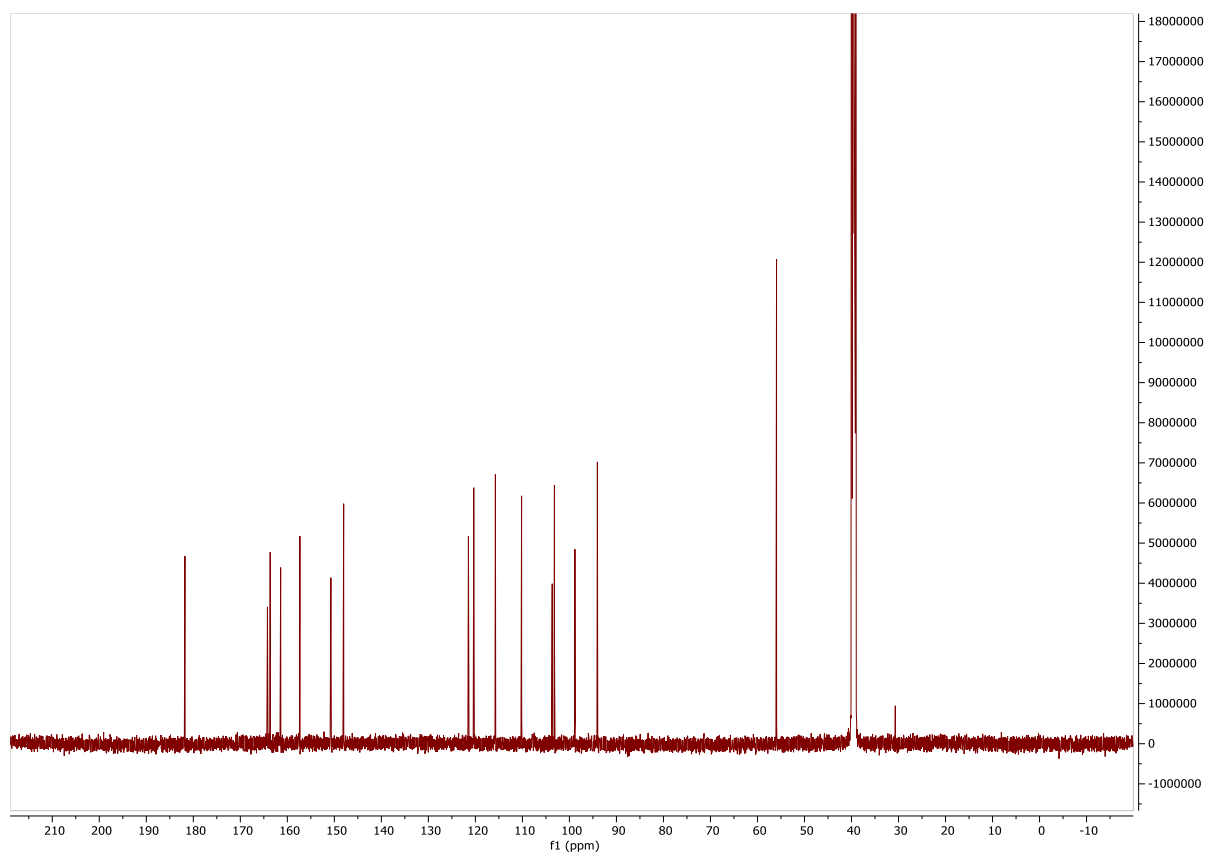

Figure S61.  $^1\text{H-NMR}$  (600.19 MHz,  $\text{MeOH-}d_4$ ) of compound 21.

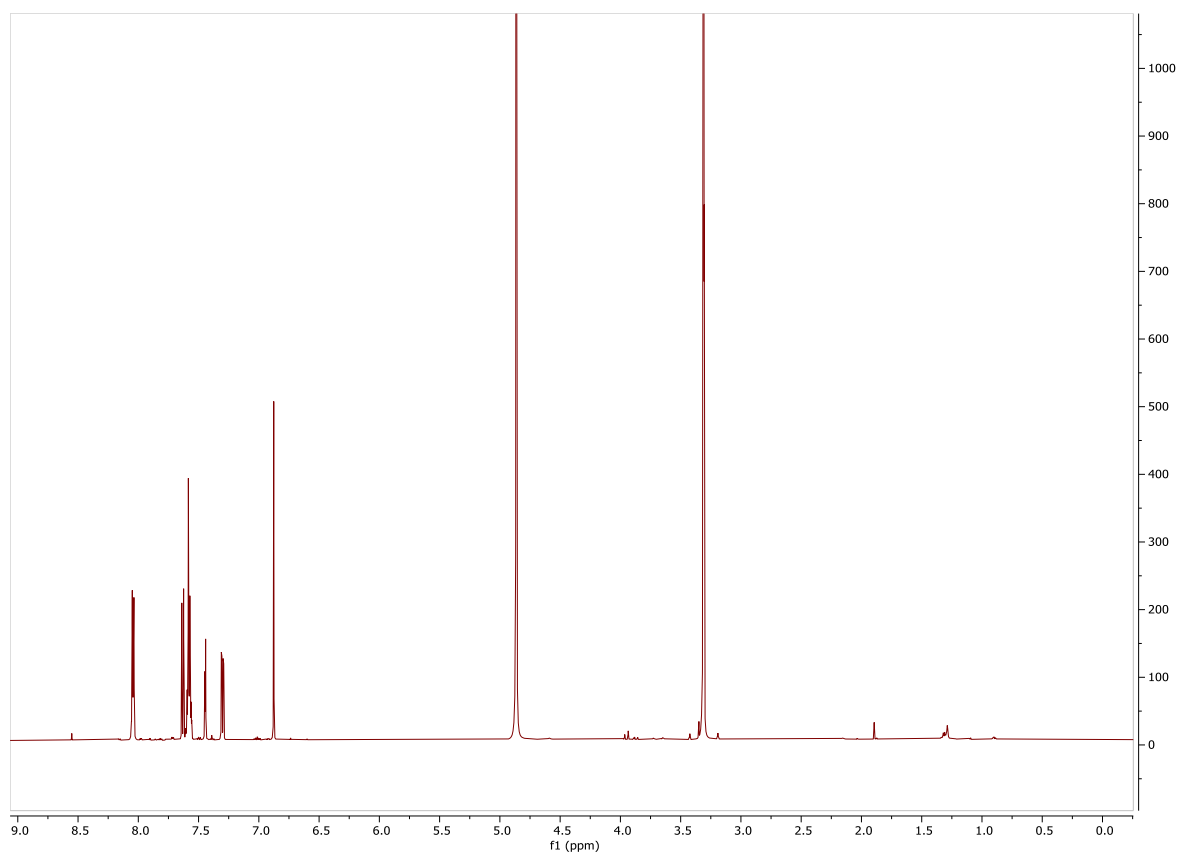



Figure S62.  $^{13}\text{C}$ -NMR (150.91 MHz,  $\text{MeOH-}d_4$ ) of compound 21.

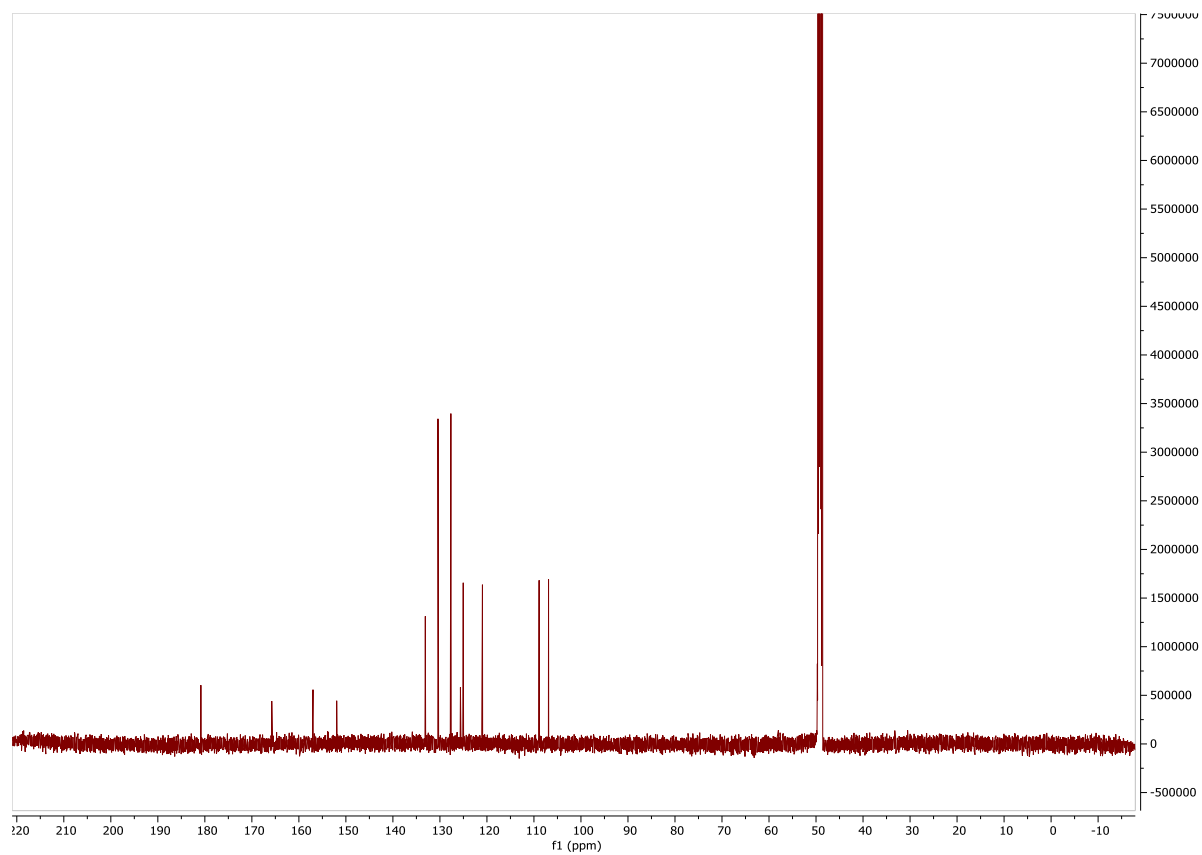

Figure S63.  $^1\text{H-NMR}$  (600.19 MHz,  $\text{CHCl}_3-d$ ) of compound 22.

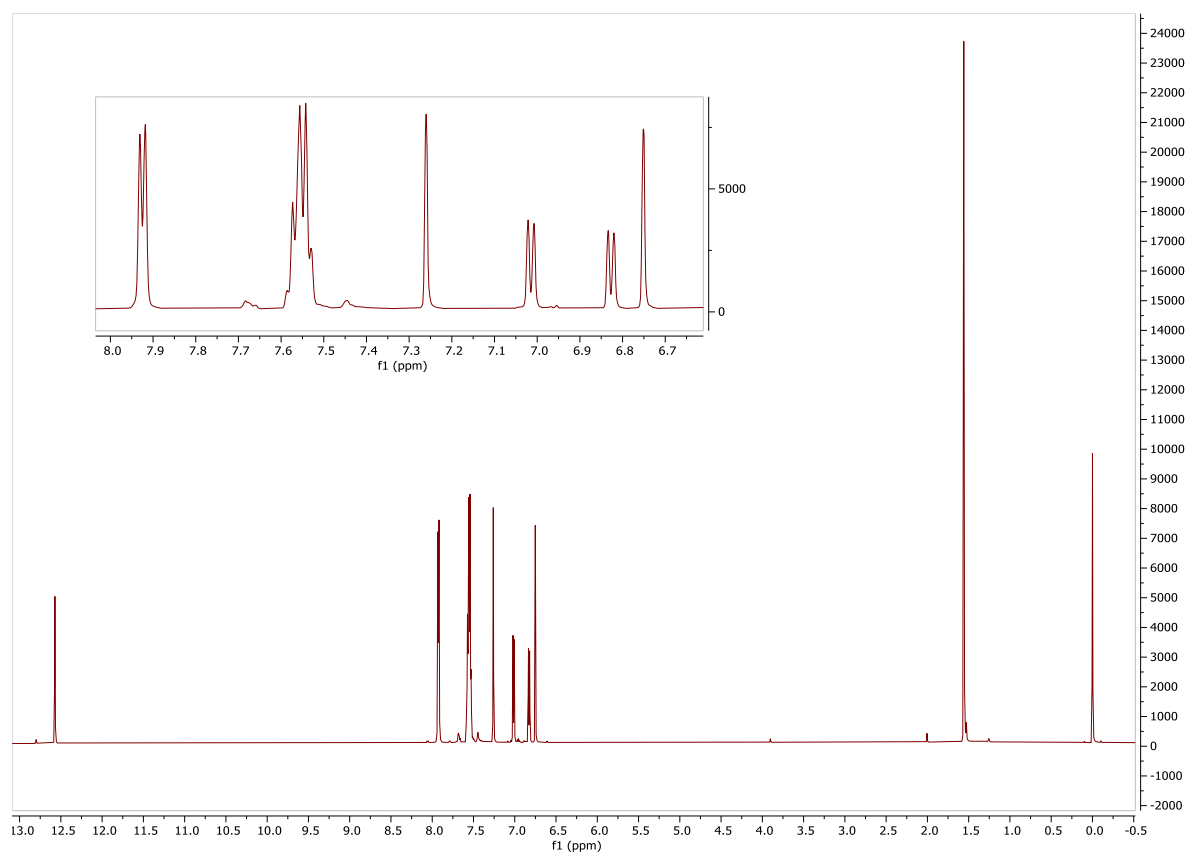

Figure S64.  $^{13}\text{C}$ -NMR (150.91 MHz,  $\text{CHCl}_3$ -*d*) of compound 22.

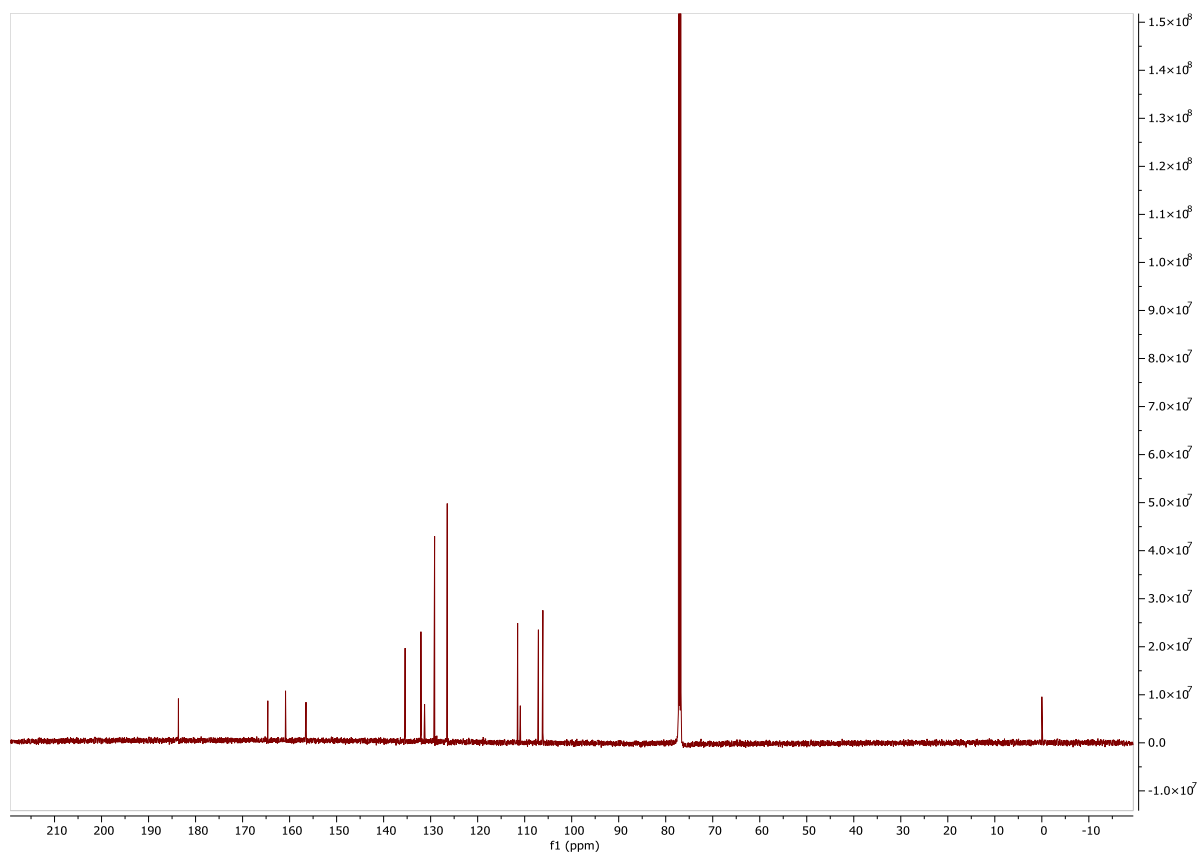

Figure S65.  $^1\text{H-NMR}$  (600.19 MHz, Acetone- $d_6$ ) of compound 23.

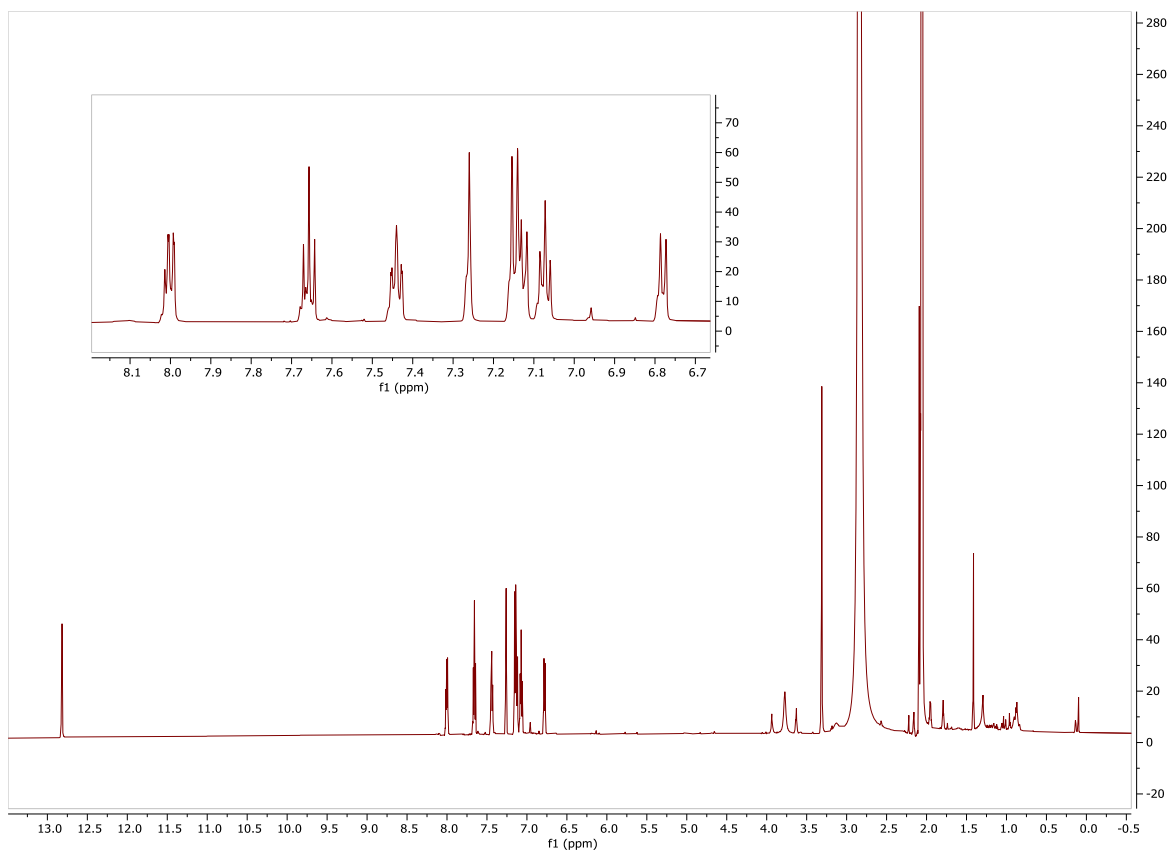

Figure S66.  $^{13}\text{C}$ -NMR (150.91 MHz, Acetone- $d_6$ ) of compound 23.

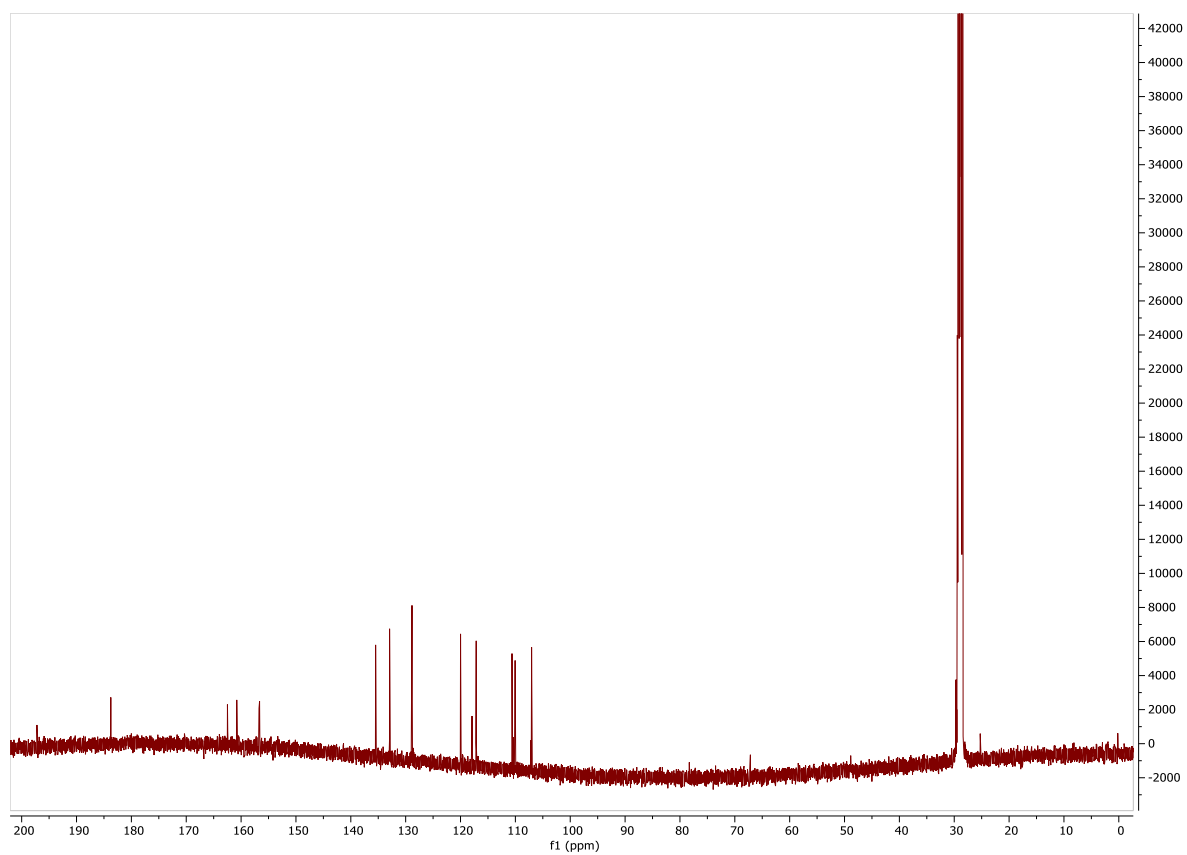

Figure S67.  $^1\text{H-NMR}$  (600.19 MHz,  $\text{MeOH-}d_4$ ) of compound 24.

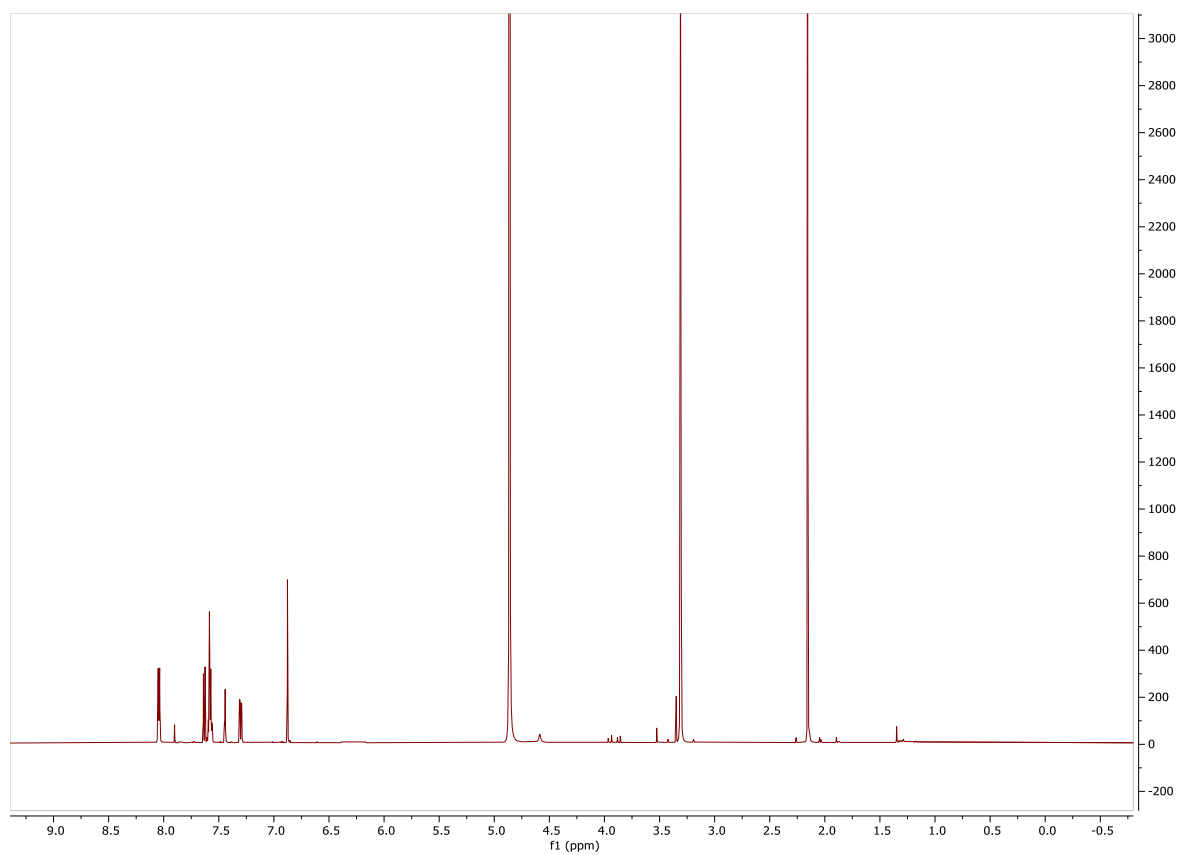

Figure S68.  $^{13}\text{C}$ -NMR (150.91 MHz,  $\text{MeOH-}d_4$ ) of compound 24.

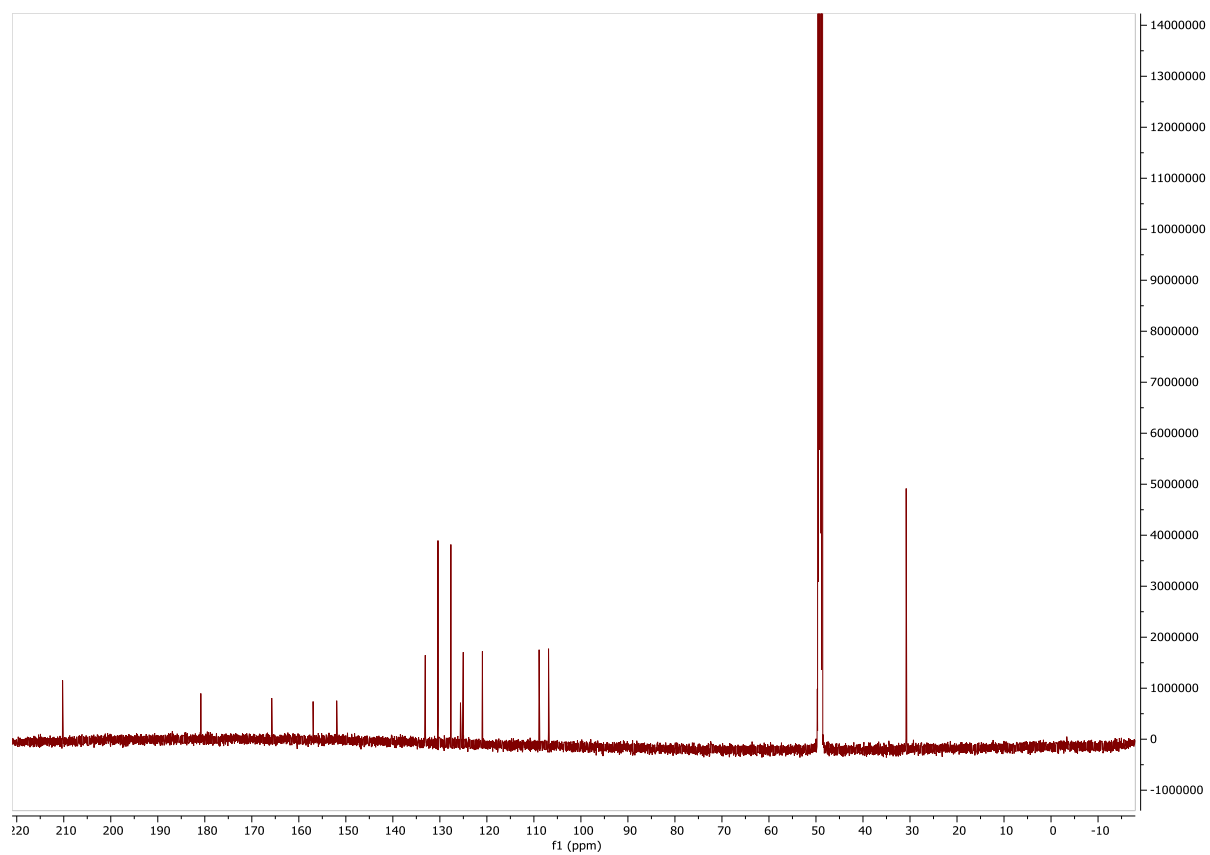

Figure S69.  $^1\text{H-NMR}$  (600.19 MHz,  $\text{DMSO-}d_6$ ) of compound 25.

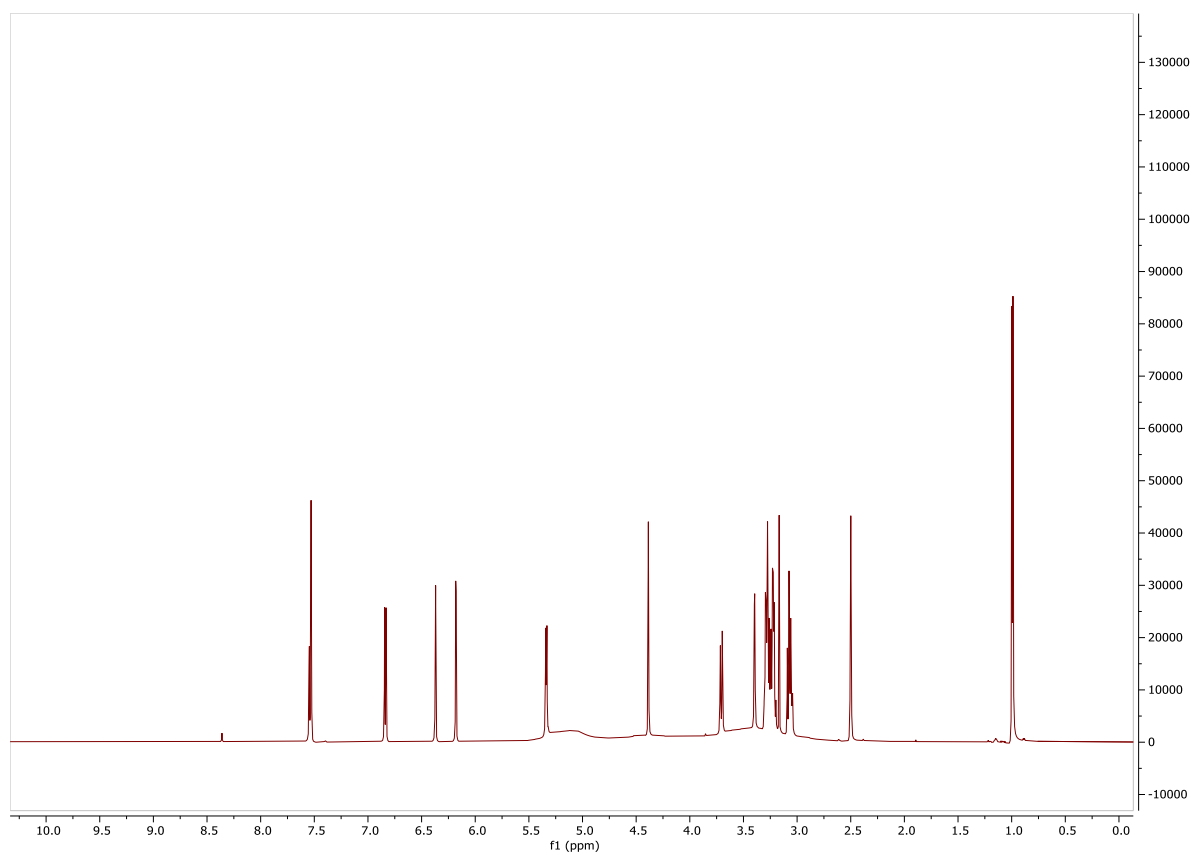



Figure S70.  $^{13}\text{C}$ -NMR (150.91 MHz,  $\text{DMSO-}d_6$ ) of compound 25.

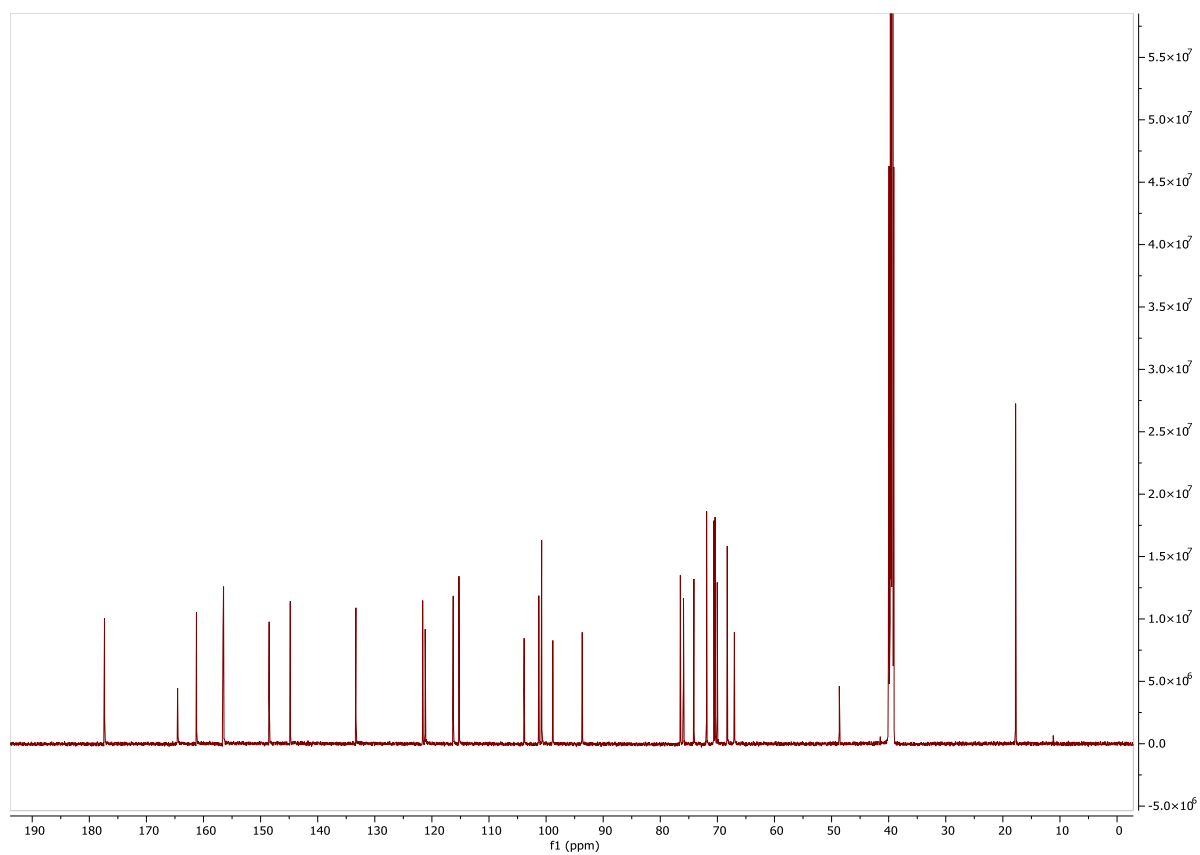

**Table S1.** Anti-proliferative activity of selected compounds isolated from diethyl ether subfraction of the methanolic extract of *D. diapensifolia* in MTT assay after 24 h shown as % cellular inhibition (MEAN±SEM) of n = 3. \*\*\*, \*\*, \* denote  $p < 0.001$ ,  $p < 0.01$ ,  $p < 0.05$  vs. control.

| Compound | 50<br>$\mu\text{g}/\text{mL}$<br>$\mu\text{M}$ | 10<br>$\mu\text{g}/\text{mL}$<br>$\mu\text{M}$ | 5<br>$\mu\text{g}/\text{mL}$<br>$\mu\text{M}$ |
|----------|------------------------------------------------|------------------------------------------------|-----------------------------------------------|
| 1        | 0.00±0.00                                      | 0.67±0.67                                      | 3.33±2.40                                     |
| 2        | 0.13±0.13                                      | 0.00±0.00                                      | 4.72±2.48                                     |
| 3        | 2.40±2.40                                      | 2.27±2.27                                      | 0.50±0.50                                     |
| 4        | 1.93±1.93                                      | 0.03±0.03                                      | 0.70±0.70                                     |
| 6        | 69.43±0.18***                                  | 0.00±0.00                                      | 0.00±0.00                                     |
| 8        | 0.36±0.36                                      | 0.66±0.66                                      | 1.40±0.91                                     |
| 9        | 12.63±0.24*                                    | 6.23±3.24                                      | 3.80±3.10                                     |
| 10       | 40.33±0.88                                     | 1.00±0.58                                      | 0.00±0.00                                     |
| 11       | 3.90±1.17                                      | 6.73±1.34                                      | 8.03±1.14                                     |

Figure S71. HPLC-DAD chromatogram of *D. diapensifolia* n-butanol subfraction and rutin standard.

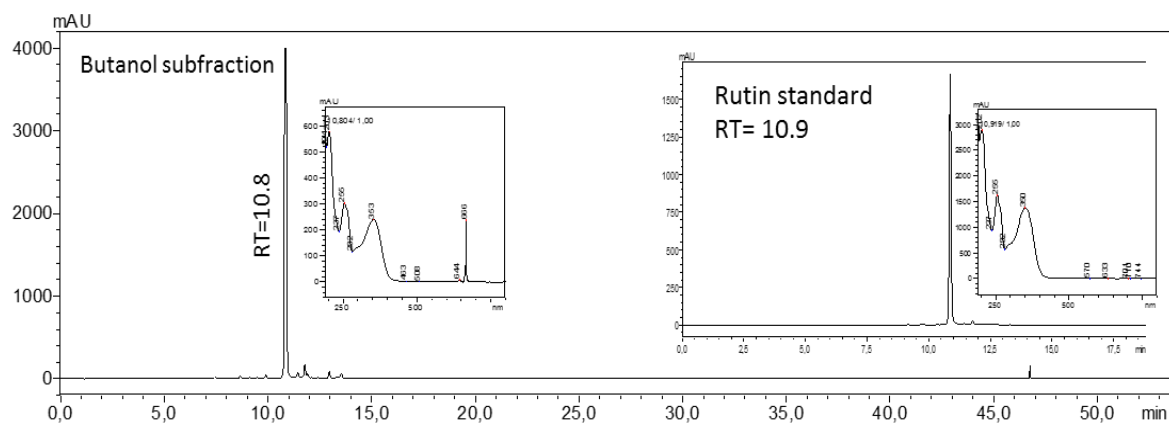

Analysis condition: stationary phase: Phenomenex Aqua C18 5 $\mu$ m, 150  $\times$  4.6 mm; mobile Phase: A = H<sub>2</sub>O + 0.02% TFA, B = acetonitrile; gradient: 0 min: B=2%; 20 min: B=50%; 40 min: B=98%, 50 min B=98%; temp.: 35°C; flow: 1 mL/min; butanol subfraction: 1 mg/mL, inj. vol. 10  $\mu$ L; rutin standard: 2 mg/mL, inj. vol. 10  $\mu$ L.

**Figure S72.** Low energy conformers of compound 1. Conformer generation was done on MacroModel 09 (Schrödinger Ltd.), using OPLS-3 as forcefield in gas phase. Conformers occurring in energy window of 5 kcal.mol<sup>-1</sup> were further optimized in DFT/6-31G(d,p) level in the gas phase using Gaussian 16 v. A3 software [1].

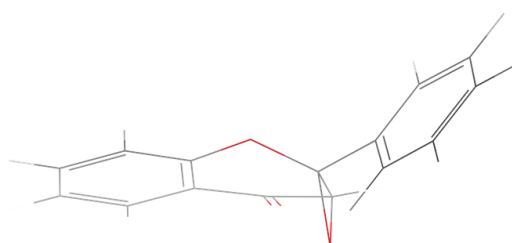

Isomer 1,  
C1: 50%

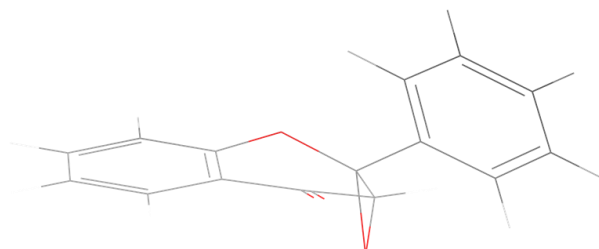

Isomer 1,  
C2: 50%

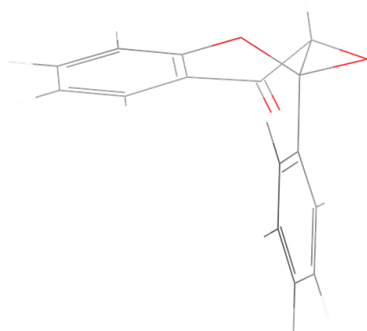

Isomer 2,  
C1: 50%

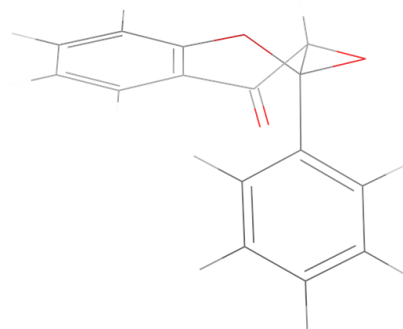

Isomer 2,  
C2: 50%

**Table S2.** Experimental chemical shifts and Boltzmann-averaged shielding tensors of two diastereomers of **1**, used for DP4+ chemical shift calculation.

| Atom | $\delta_{\text{exp}}$ (ppm) | Isomer 1 | Isomer 2 |
|------|-----------------------------|----------|----------|
| C    | 119                         | 53.423   | 52.492   |
| C    | 121.6                       | 62.683   | 54.439   |
| C    | 159                         | 23.372   | 13.689   |
| C    | 126.7                       | 63.755   | 64.914   |
| C    | 136.7                       | 44.001   | 44.863   |
| C    | 122                         | 58.970   | 58.636   |
| C    | 187.5                       | -9.164   | 0.477    |
| C    | 56.2                        | 117.895  | 114.574  |
| C    | 84.8                        | 97.934   | 89.100   |
| C    | 140.8                       | 47.319   | 51.255   |
| C    | 125.9                       | 55.482   | 52.460   |
| C    | 129.1                       | 52.892   | 53.108   |
| C    | 129.2                       | 51.508   | 50.935   |
| C    | 129.1                       | 52.892   | 53.111   |
| C    | 125.9                       | 55.481   | 52.463   |
| H    | 4.22                        | 28.148   | 23.798   |
| H    | 6.74                        | 23.319   | 24.089   |
| H    | 8.00                        | 24.147   | 23.760   |
| H    | 7.35                        | 23.703   | 24.298   |
| H    | 7.00                        | 24.193   | 27.547   |
| H    | 7.58                        | 23.723   | 23.978   |
| H    | 7.39                        | 23.883   | 24.077   |
| H    | 7.35                        | 23.875   | 24.012   |
| H    | 7.39                        | 23.883   | 24.077   |
| H    | 7.58                        | 23.723   | 23.978   |

**Figure S73.** The result sheet of DP4+ chemical shift probability calculation of two diastereomers of compound 1. Calculation of shift tensors were done using GIAO/mpw1pw91/6-311+(d,p)/CPCM in CHCl<sub>3</sub> in Gaussian 16 A.3 [Ref]. DP4+ probability calculation was done using the method originally published by Grimblat et. al [2].

| 1  | Functional       | Solvent?                                                                                  |                                                                                          | Basis Set    |          | Type of Data      |          |
|----|------------------|-------------------------------------------------------------------------------------------|------------------------------------------------------------------------------------------|--------------|----------|-------------------|----------|
| 2  | mPW1PW91         | PCM                                                                                       |                                                                                          | 6-311+G(d,p) |          | Shielding Tensors |          |
| 3  |                  |                                                                                           |                                                                                          |              |          |                   |          |
| 4  |                  | Isomer 1                                                                                  | Isomer 2                                                                                 | Isomer 3     | Isomer 4 | Isomer 5          | Isomer 6 |
| 5  | sDP4+ (H data)   |  100.00% |  0.00%  | -            | -        | -                 | -        |
| 6  | sDP4+ (C data)   |  99.99%  |  0.01%  | -            | -        | -                 | -        |
| 7  | sDP4+ (all data) |  100.00% |  0.00%  | -            | -        | -                 | -        |
| 8  | uDP4+ (H data)   |  79.58%  |  20.42% | -            | -        | -                 | -        |
| 9  | uDP4+ (C data)   |  100.00% |  0.00%  | -            | -        | -                 | -        |
| 10 | uDP4+ (all data) |  100.00% |  0.00%  | -            | -        | -                 | -        |
| 11 | DP4+ (H data)    |  100.00% |  0.00%  | -            | -        | -                 | -        |
| 12 | DP4+ (C data)    |  100.00% |  0.00%  | -            | -        | -                 | -        |
| 13 | DP4+ (all data)  |  100.00% |  0.00%  | -            | -        | -                 | -        |

## References

- (1) Frisch, M. J.; Trucks, G. W.; Schlegel, H. B.; Scuseria, G. E.; Robb, M. A.; Cheeseman, J. R.; Scalmani, G.; Barone, V.; Petersson, G. A.; Nakatsuji, H.; Li, X.; Caricato, M.; Marenich, A.; Bloino, J.; Janesko, B. G.; Gomperts, R.; Mennucci, B.; Hratchian, H. P.; Ortiz, J. V.; Izmaylov, A. F.; Sonnenberg, J. L.; Williams-Young, D.; Ding, F.; Lipparini, F.; Egidi, F.; Goings, J.; Peng, B.; Petrone, A.; Henderson, T.; Ranasinghe, D.; Zakrzewski, V. G.; Gao, J.; Rega, N.; Zheng, G.; Liang, W.; Hada, M.; Ehara, M.; Toyota, K.; Fukuda, R.; Hasegawa, J.; Ishida, M.; Nakajima, T.; Honda, Y.; Kitao, O.; Nakai, H.; Vreven, T.; Throssell, K.; Montgomery, J. A. J.; Peralta, J. E.; Ogliaro, F.; Bearpark, M.; Heyd, J. J.; Brothers, E.; Kudin, K. N.; Staroverov, V. N.; Keith, T.; Kobayashi, R.; Normand, J.; Raghavachari, K.; Rendell, A.; Burant, J. C.; Iyengar, S. S.; Tomasi, J.; Cossi, M.; Millam, J. M.; Klene, M.; Adamo, C.; Cammi, R.; Ochterski, J. W.; Martin, R. L.; Morokuma, K.; Farkas, O.; Foresman, J. B.; Fox, D. J. Gaussian 16, Revision A.03, Gaussian, Inc.: Wallingford, CT, USA 2016.
- (2) Grimblat, N.; Zanardi, M. M.; Sarotti, A. M. Beyond DP4: An Improved Probability for the Stereochemical Assignment of Isomeric Compounds Using Quantum Chemical Calculations of NMR Shifts. *J. Org. Chem.* **2015**, *80* (24), 12526–12534. <https://doi.org/10.1021/acs.joc.5b02396>.
